# Supplementary material
Source: PubMed Central journal article supplement (PMC3409588)
Supplement: NIHMS270222-supplement-4.pdf [file NIHMS270222-supplement-4.pdf]

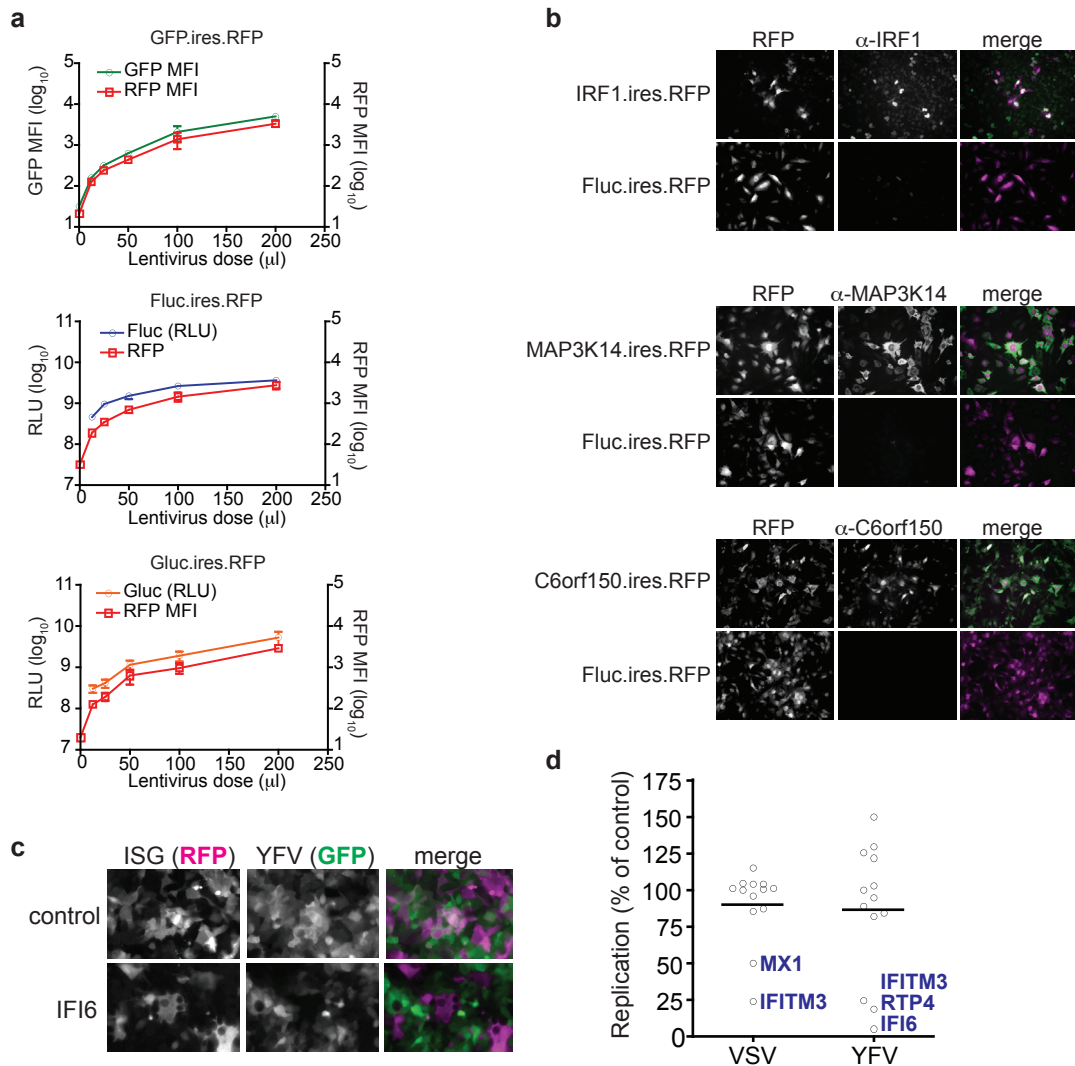

**Supplementary Figure 1.** Characterization of bicistronic lentivirus construct. **a.** Three reporter genes (GFP, Fluc, Gluc) were inserted into the bicistronic lentiviral construct shown in Fig 1a. Lentiviral stocks were generated as described in Supplementary Methods and used to transduce  $7 \times 10^4$  *STAT1*<sup>-/-</sup>Fib in 24 well plates at the indicated doses. Transduced cells were harvested 48 h later and processed for FACS analysis as described in Supplemental Methods. The mean fluorescence intensities of GFP and RFP were quantified by FACS. Fluc and Gluc were measured by commercially available kits (Promega). First cistron genes (GFP, Fluc, Gluc) are plotted on the left y-axis and the second cistron gene (RFP) is plotted on the right y-axis. The data show that, for all three constructs, both cistrons express well and levels are approximately 1:1. Results are mean  $\pm$  s.d. from a representative experiment performed with n=3 (Gluc, GFP) or n=4 (Fluc). **b.** Three ISG-expressing lentiviral preps (IRF1.ires.RFP, MAP3K14.ires.RFP, C6orf150.ires.RFP) were used to transduce *STAT1*<sup>-/-</sup>Fib as above. Cells were processed for immunofluorescence as described in Supplementary Methods. Single channel red and green images are shown in black and white. Merged images are shown in magenta and green, with overlap depicted as white. **c.** Representative microscopy images showing IFI6-mediated inhibition of YFV as compared to Fluc control in Huh-7 cells. Images were processed with Adobe Photoshop with minor adjustments to contrast. **d.** Small-scale screen testing the antiviral potential of eleven ISGs (described in text) and two controls (Fluc, Gluc) against VSV and YFV. Replication represents the percentage of GFP<sup>+</sup> cells in the RFP<sup>+</sup> population normalized to Fluc control. Black line indicates population mean.

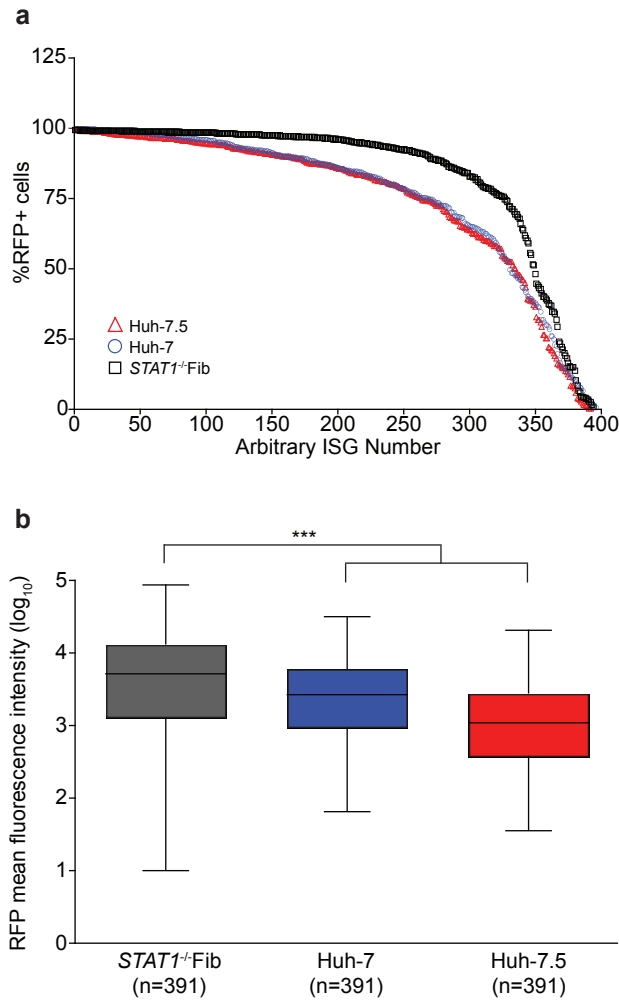

**Supplementary Figure 2.** RFP levels from TRIP.CMV.IVsb.ISG.ires.TagRFP lentiviruses. **a.** The percentage of RFP<sup>+</sup> cells in Huh-7.5, Huh-7, and *STAT1*<sup>-/-</sup>Fib during HCV and YFV large-scale screens was quantified by FACS. Data points were ranked numerically from high to low. Transduction efficiency as measured by % RFP<sup>+</sup> cells was higher in *STAT1*<sup>-/-</sup>Fib compared to Huh-7 or Huh-7.5 cells. Approximately 12% of genes exhibited poor transduction (less than 30% RFP<sup>+</sup>) and were excluded from subsequent analyses or assayed for inhibitory activity by transient transfection (see Supplementary Figure 4). **b.** The average RFP mean fluorescence intensity (a surrogate for ISG expression levels) from all samples in (a) was quantified by FACS and depicted as box and whisker plots. Data represent n=391. Statistical significance was determined by one-way ANOVA. (\*\*\*, P<0.001, \*\*, P<0.01, \*, P<0.05, ns-not significant).

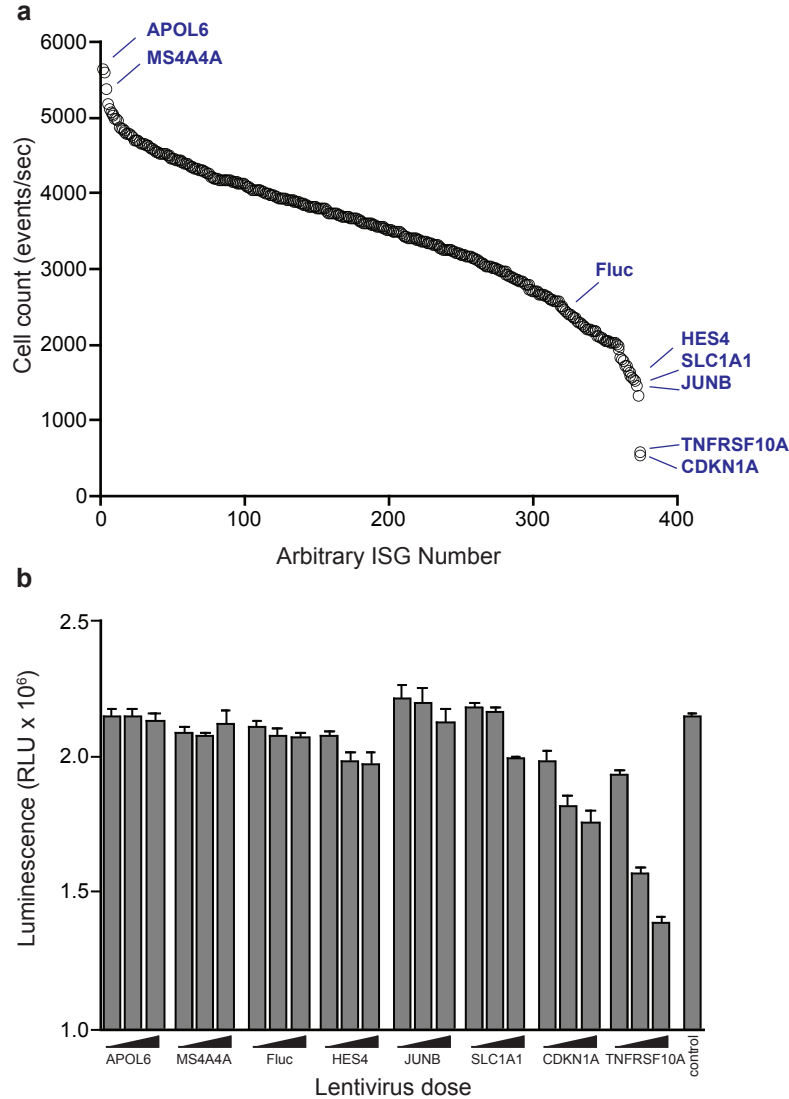

**Supplementary Figure 3.** Cell viability in ISG-transduced cells. **a.** Cell count data from the VEEV screen was obtained during flow cytometry acquisition. Two genes (*TNFRSF10A* and *CDKN1A*) were identified as potentially toxic based on low cell numbers. **b.** *STAT1*<sup>-/-</sup>Fib were plated at a density of 10<sup>4</sup> cells/well in 96 well plates and transduced with 5, 10, or 20 μl of indicated ISG-expressing lentiviral stocks. Cells were incubated for 48 h and tested for viability using Cell-titer Glo luminescence-based assay (Promega). The data show that increased doses of lentiviral preparations lead to decreased cell counts for *TNFRSF10A* and *CDKN1A*, whereas several other genes tested had little to no impact on cell viability. Results are mean ± s.d. from a representative experiment, n=8.

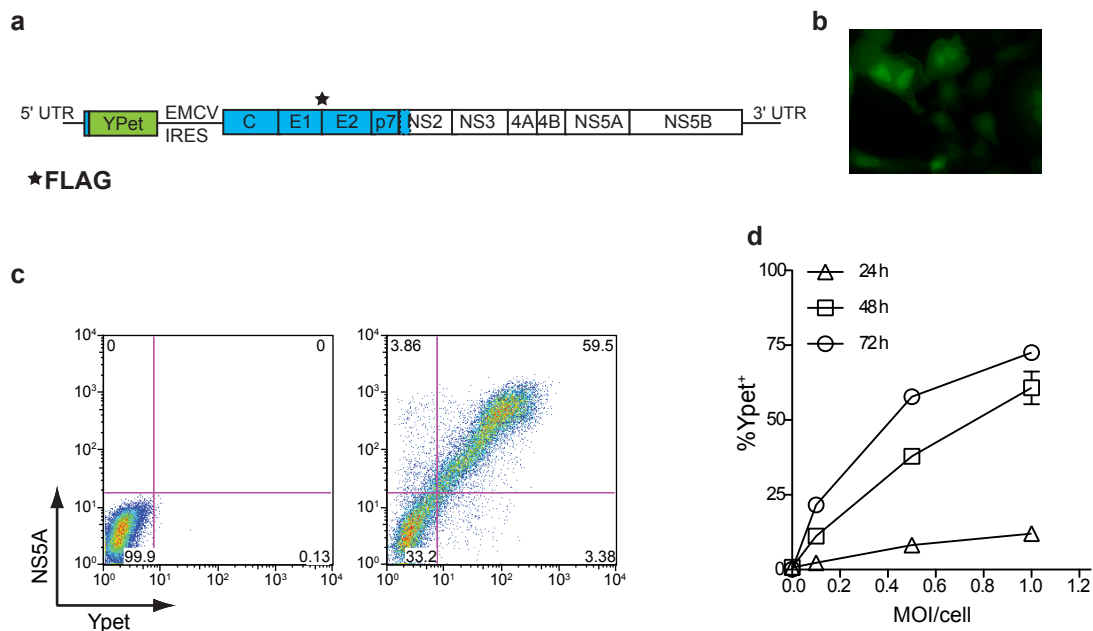

**Supplementary Figure 4.** Characterization of HCV expressing Ypet. **a.** Diagram of Bi-Ypet-Jc1FLAG2 molecular clone. The HCV IRES drives Ypet expression in the first cistron and the EMCV IRES drives expression of the Jc1 HCV polyprotein in the second cistron. **b.** Fluorescence microscopy image of Huh-7.5 at 48 h post-infection with HCV-Ypet. **c.** Co-staining of Ypet and NS5A. Huh-7.5 cells infected with HCV-Ypet were harvested in 200  $\mu$ l Accumax, washed in 1X PBS, and processed with Cytotfix/Cytoperm kit (BD Biosciences) to stain for NS5A expression using the 9E10 monoclonal antibody. **d.** Dose and time dependency of HCV-Ypet replication. Huh-7 cells were infected with varying doses of HCV-Ypet, harvested 24 h, 48 h, or 72 h post-infection, and analyzed for Ypet expression by FACS. Results are mean  $\pm$  s.d. from a representative experiment, n=3.

**a**

| Gene       | Percent Infected | Z score | Gene    | Percent Infected | Z score | Gene    | Percent Infected | Z score |
|------------|------------------|---------|---------|------------------|---------|---------|------------------|---------|
| IFIH1/MDA5 | 42.3             | -3.22   | ABCA9   | 78.7             | -0.13   | B4GALT5 | 87.2             | 0.59    |
| MOV10      | 46.4             | -2.87   | SAT1    | 79.0             | -0.10   | IFITM1  | 87.7             | 0.64    |
| DDX60      | 46.7             | -2.85   | DDX3X   | 79.8             | -0.04   | RNF24   | 87.7             | 0.64    |
| UBA7       | 62.0             | -1.55   | SLFN12  | 80.3             | 0.01    | ZNF107  | 87.7             | 0.64    |
| FLJ11286   | 66.4             | -1.17   | APOL6   | 81.1             | 0.08    | CCL2    | 88.0             | 0.66    |
| NOS2A      | 67.5             | -1.08   | TRIM56  | 81.7             | 0.13    | BUB1    | 88.0             | 0.66    |
| MS4A4A     | 68.3             | -1.01   | C9orf19 | 82.0             | 0.15    | ZNF295  | 88.0             | 0.66    |
| PABPC4     | 69.9             | -0.87   | ADAR    | 83.3             | 0.27    | DTX3L   | 88.5             | 0.71    |
| N4BP1      | 71.6             | -0.73   | PLEKHA4 | 83.9             | 0.31    | BST2    | 88.8             | 0.73    |
| APOBEC3G   | 73.2             | -0.59   | CEACAM1 | 84.4             | 0.36    | TLR7    | 88.8             | 0.73    |
| OAS3       | 73.5             | -0.57   | ANKFY1  | 84.7             | 0.38    | TFEC    | 89.1             | 0.75    |
| CNP        | 74.9             | -0.45   | RAB27A  | 85.0             | 0.41    | EIF2AK2 | 89.6             | 0.80    |
| BLZF1      | 75.4             | -0.41   | APOL3   | 86.1             | 0.50    | FLT1    | 89.6             | 0.80    |
| TLK2       | 76.0             | -0.36   | VEGFC   | 86.3             | 0.52    | RASGEF1 | 94.0             | 1.17    |
| PCTK3      | 76.0             | -0.36   | ZNF313  | 86.6             | 0.55    | ZAP     | 94.0             | 1.17    |
| CASP1      | 76.5             | -0.31   | OAS1    | 86.9             | 0.57    | RBM25   | 94.5             | 1.22    |
| MX2        | 77.6             | -0.22   | RARRES3 | 87.2             | 0.59    | Fluc    | 100.0            | 1.68    |
| FNDC3B     | 77.9             | -0.20   |         |                  |         |         |                  |         |

**b**

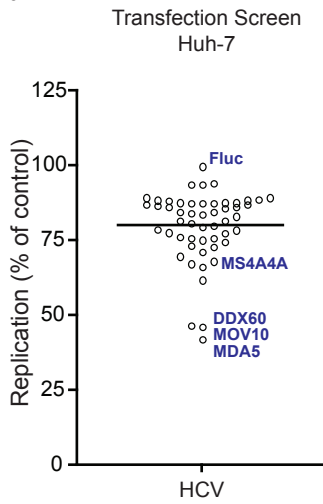

**c**

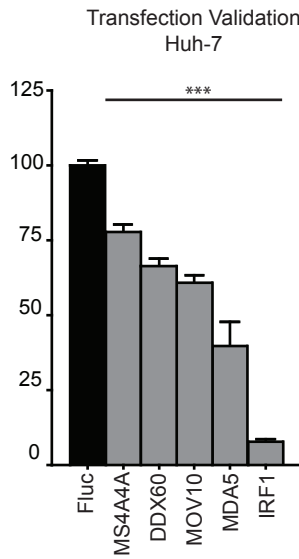

**d**

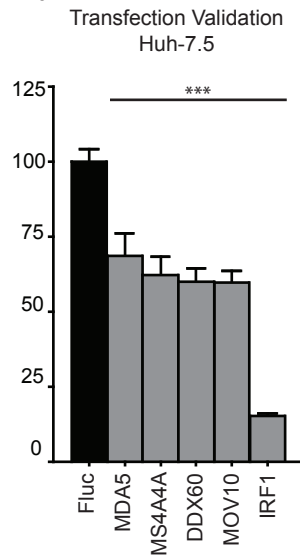

**Supplementary Figure 5.** Transient transfection-based screen of 50 ISGs against HCV. Fifty ISGs that failed to mediate high-level RFP expression in lentiviral assays were screened by transient transfection in Huh-7 cells as described in Supplementary Methods. **a.** Table showing HCV inhibition by fifty genes with infectivity and Z-scores. **b.** Dot plot of data in (a). Replication levels were normalized to Fluc control. Select ISGs are denoted in blue. Black line indicates population mean. **c, d.** Validation assays of selected genes in Huh-7 (c) and Huh-7.5 (d). Results are mean  $\pm$  s.d. from a representative experiment, n=3.

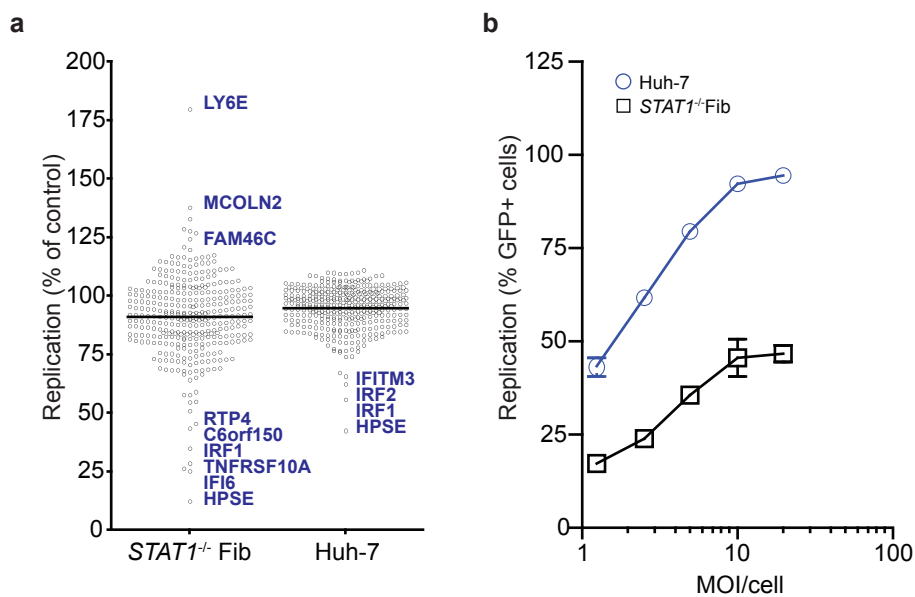

**Supplementary Figure 6.** Large-scale ISG screens against YFV in *STAT1*<sup>-/-</sup>Fib and Huh-7. **a.** Dot plots of YFV replication in *STAT1*<sup>-/-</sup>Fib or Huh-7 normalized to Fluc control. Select ISGs are denoted in blue. Black line indicates population mean. *STAT1*<sup>-/-</sup>Fib data is identical to screening data in Fig 2 and is shown here for comparison to Huh-7. **b.** Differential YFV replication levels in *STAT1*<sup>-/-</sup>Fib and Huh-7. Cells were infected with varying doses of YFV, harvested 24 h post-infection, and replication levels were quantified by FACS. Results are mean ± s.d. from a representative experiment, n=3.

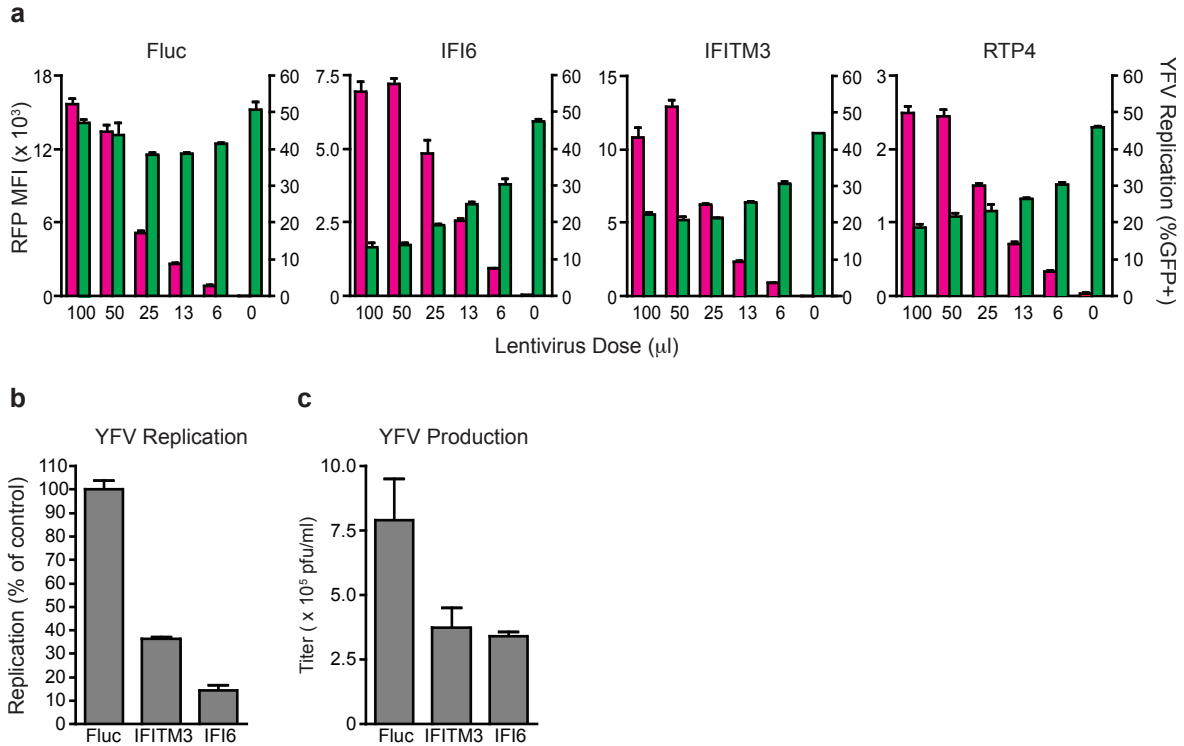

**Supplementary Figure 7.** Validation of *IFI6*, *IFITM3*, and *RTP4* as anti-YFV hits in *STAT1*<sup>-/-</sup>Fib. **a.** Lentiviruses expressing *IFI6*, *IFITM3*, or *RTP4* were tested for dose-dependent inhibition of YFV. RFP mean fluorescence (magenta bars) is plotted on the left y-axis and YFV replication (green bars) is plotted in the right y-axis. **b.** Inhibition of YFV expressing GFP by *IFITM3* and *IFI6* as measured in by FACS. **c.** Inhibition of YFV-17D (non-GFP) by *IFITM3* and *IFI6* as measured by plaque assay on BHK-J cells. For all panels, results are mean  $\pm$  s.d. from a representative experiment, n=3.

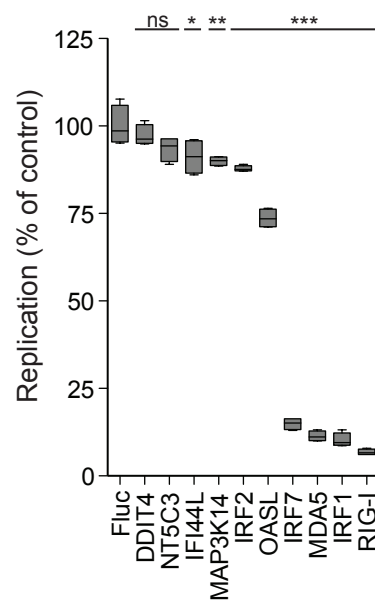

**Supplementary Figure 8.** Anti-HCV effect of ISGs post-infection. Huh-7 cells were infected with HCV-Ypet for 12 hours, followed by transduction with ISG-expressing lentiviruses as described above. 48 hours post transduction, cells were harvested and replication levels were quantified by FACS. Data are depicted as box and whisker plots. Data are from a representative experiment with n=4. Statistical significance was determined by one-way ANOVA. (\*\*\*, P<0.001, \*\*, P<0.01, \*, P<0.05, ns-not significant).



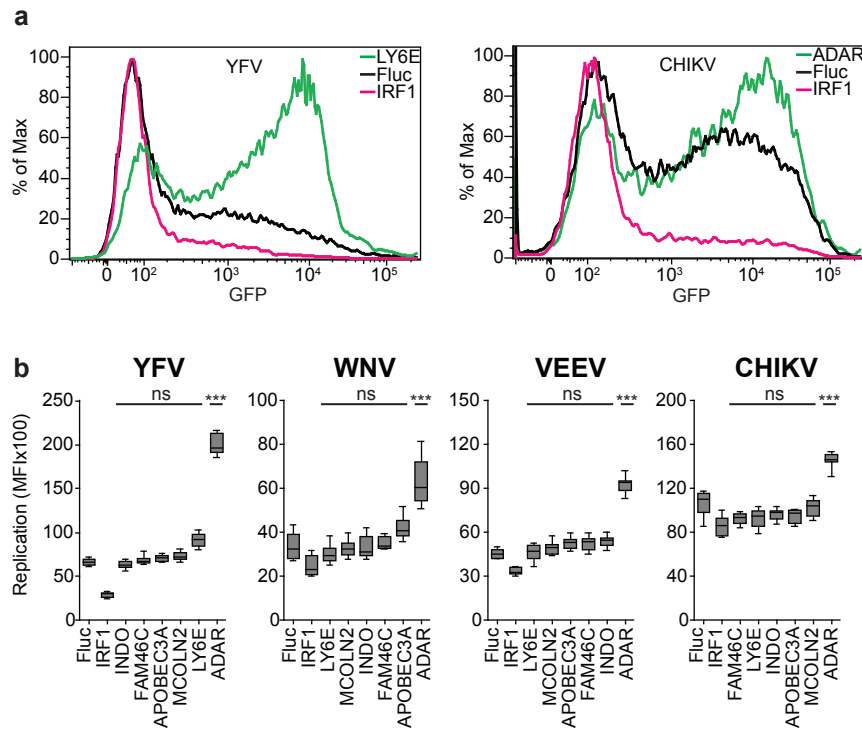

**Supplementary Figure 9.** Identification of ISGs that enhance replication of YFV, WNV, VEEV, and CHIKV. **a.** Representative FACS plots showing impact of *LY6E* on YFV (left panel) and *ADAR* on CHIKV (right panel). **b.** Validation assays of selected enhancing ISGs. Independent lentiviral preparations were generated and tested for replication enhancement. Replication levels were plotted as GFP mean fluorescence intensity in the RFP<sup>+</sup>GFP<sup>+</sup> population. Data are represented by box and whisker plots with n=9. Statistical significance was determined by one-way ANOVA. (\*\*\*, P<0.001, \*\*, P<0.01, \*, P<0.05, ns-not significant)

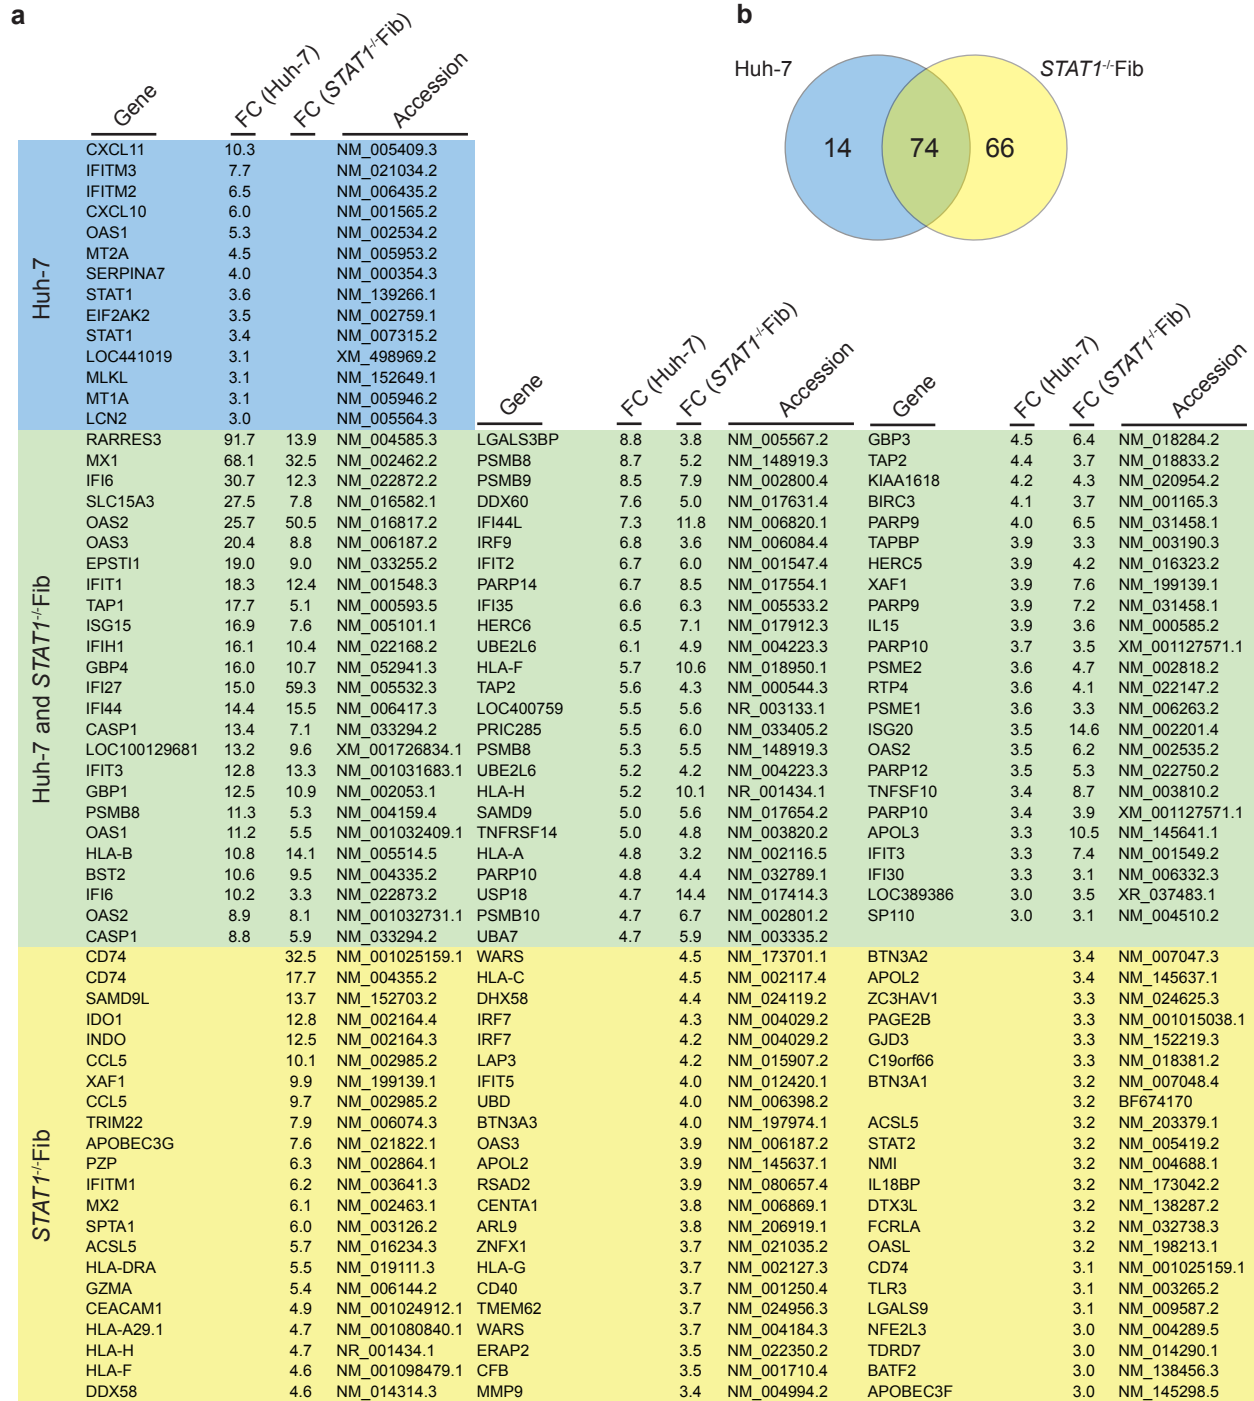

**Supplementary Figure 10.** Microarray analysis of *IRF1*-expressing cells. Huh-7 and *STAT1*<sup>-/-</sup>Fib were transduced with lentiviruses expressing *IRF1* or Fluc as a control. Total RNA was harvested at 48 h and processed for Illumina BeadArray. Data was analyzed with GeneSpring Software. Genes shown were induced at least 3-fold by *IRF1* compared to Fluc ( $p < 0.05$ ,  $n = 3$ ). Data represent one of two experiments.

### Molecular Function

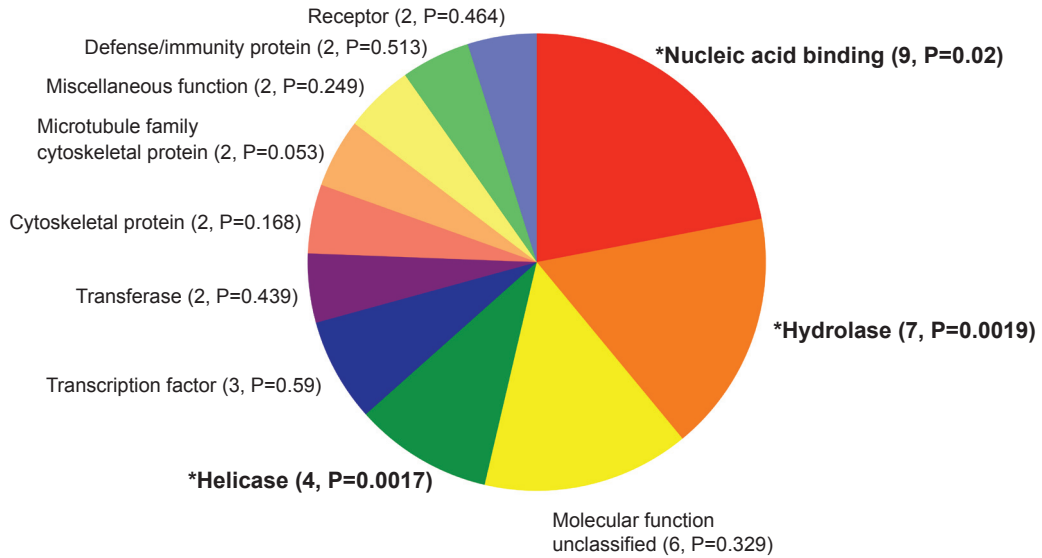

### Biological Process

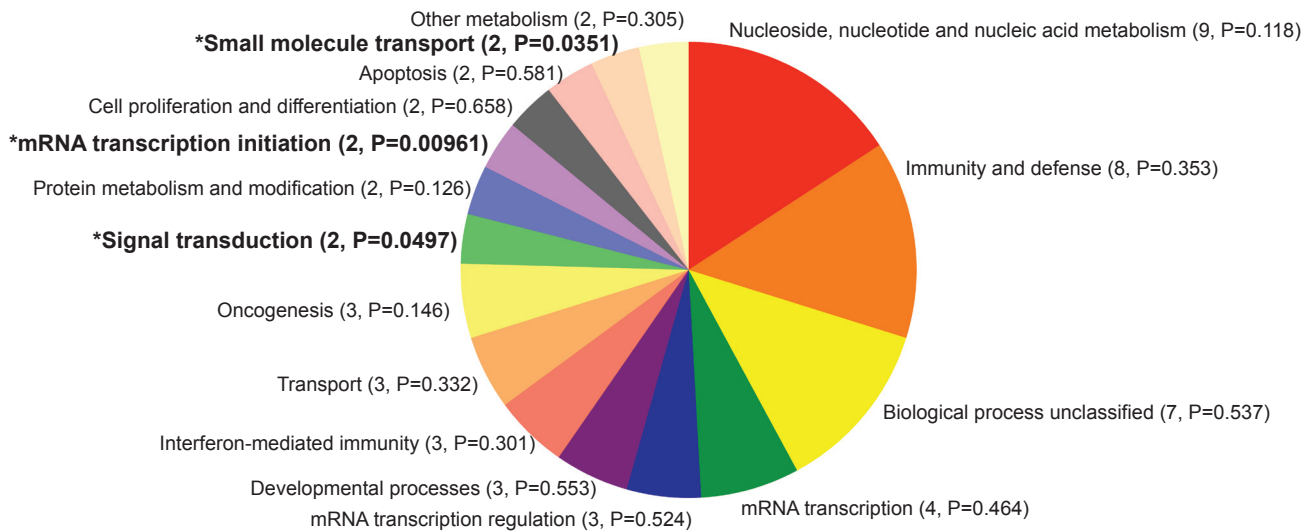

**Supplementary Figure 11.** Gene ontology analysis classifying validated hits by molecular function (top panel) and biological process (bottom panel). The 389 ISG list was used as a reference. Only categories with two or more genes were charted. \* denotes enriched categories ( $P < 0.05$ ).

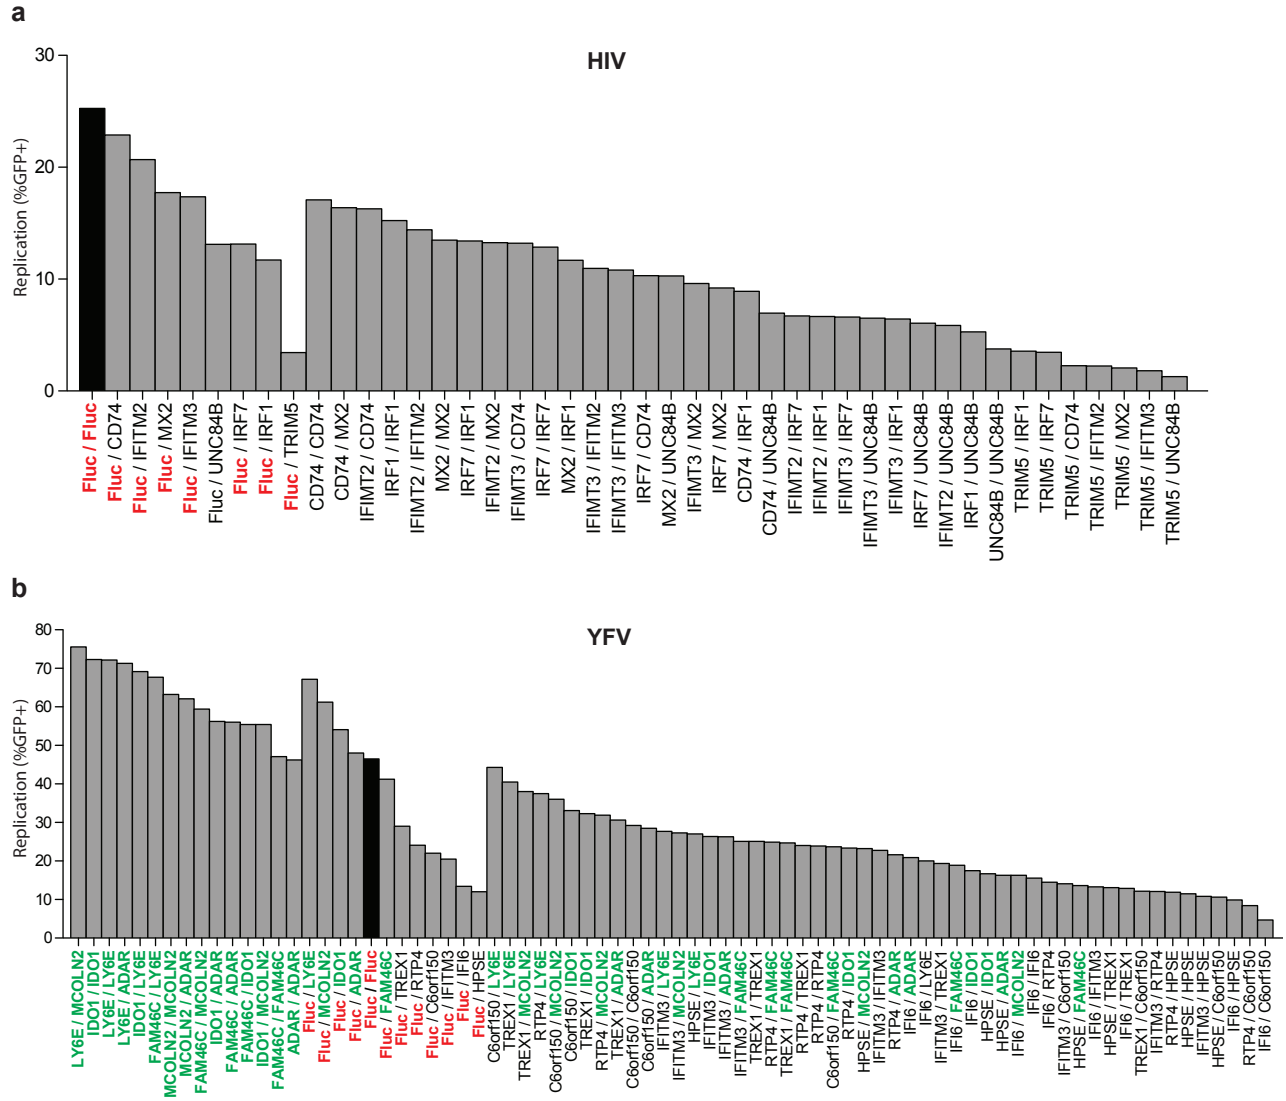

**Supplementary Figure 12.** Combinatorial action of inhibitory and enhancing ISGs. Select ISGs were tested in all 2-gene combinations for inhibition of HIV in MT-4 cells **(a)** or YFV in *STAT1*<sup>-/-</sup>Fib **(b)**. Data are represented as %GFP-expressing cells. ISGs are color-coded: control (red), inhibitory (black), enhancing (green).

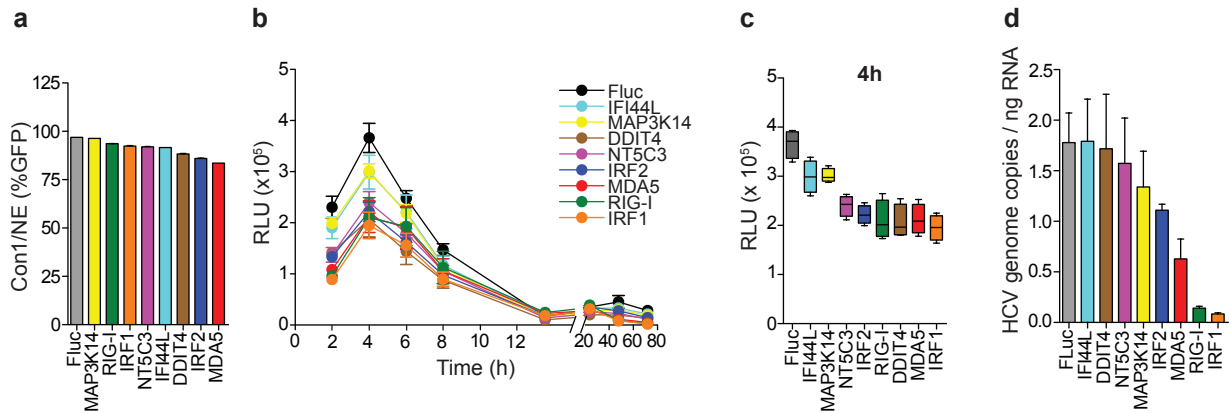

**Supplementary Figure 13.** ISG antiviral effects in the HCV life cycle. **a.** ISG-expressing Huh-7 cells were infected with genotype 1b-Con1 HCV pseudoparticles expressing GFP or Gluc. 48 h post-infection HCVpp entry was assessed by quantitation of GFP by FACS or Gluc by reporter gene assay of cell supernatants. The fold increase of HCVpp infection over a non-enveloped (NE) pseudoparticle expressing a homologous reporter is reported. Data are from one of three experiments with n=3. **b.** ISG-expressing Huh-7 cells were transfected with in vitro transcribed replication-defective HCV subgenomic replicon RNA (SG-GNN) expressing Gluc. Reporter gene activity was measured in cell supernatants at 2, 4, 6, 8, 13.5, 24, 48, and 72 h post-transfection. **c.** ISG-mediated inhibition of primary translation (from panel **b**) was inferred from Gluc levels at 4 h. Data represent one of three independent experiments with n=4. Fluc-GNN data in this figure is identical to Fluc-GNN data in Figure 3a and is shown in both graphs for comparison. **d.** ISG-expressing Huh-7 cells were transfected with in vitro transcribed HCV subgenomic replicon RNA expressing Gluc. Total RNA was harvested 72 h post-transfection and HCV genome copy number was assessed by real time RT-PCR. Data are represented as genome copies per ng input RNA.

| <b>Supplementary Table 1: ISG microarray data sets and inclusion criteria for screening</b> |                            |                                                    |                      |                                                                                                                                                    |
|---------------------------------------------------------------------------------------------|----------------------------|----------------------------------------------------|----------------------|----------------------------------------------------------------------------------------------------------------------------------------------------|
| <b>Reference</b>                                                                            | <b>IFN<sup>1</sup></b>     | <b>Tissue/cell type</b>                            | <b>Time pt.</b>      | <b>Inclusion Criteria (FC – fold change)<sup>2,3</sup></b>                                                                                         |
| Brodsky LI et al. <i>PLoS One</i> . 2007;2(7):e584.                                         | IFN $\alpha$               | PBMCs from HCV-infected patients                   | 0, 1, 2, 7, 14, 28 d | included 36 gene associated with early decrease in HCV titers                                                                                      |
| de Veer MJ et al. <i>J Leukoc Biol</i> . 2001;69(6):912-20.                                 | IFN $\alpha$ , IFN $\beta$ | HT1080, MEFs, human dendritic cells                | 1, 3, 6, 18, 24 h    | FC>2.0 (IFN $\alpha$ ), FC>1.5 (IFN $\beta$ )                                                                                                      |
| He XS et al. <i>Hepatology</i> . 2006;44(2):352-9.                                          | IFN $\alpha$               | PBMCs from HCV-infected patients (treated ex vivo) | 5 h                  | FC>2                                                                                                                                               |
| Hilkens CM, <i>J Immunol</i> . 2003;171(10):5255-63.                                        | IFN $\alpha$               | human T cells and dendritic cells                  | 6, 8 h               | FC>2 at 6h                                                                                                                                         |
| Hultcrantz M et al. <i>Virology</i> . 2007;367(1):92-101.                                   | IFN $\alpha$               | human pancreatic islet cells                       | 6 h                  | FC>2.0                                                                                                                                             |
| Indraccolo S et al. <i>J Immunol</i> . 2007;178(2):1122-35                                  | IFN $\alpha$ , IFN $\beta$ | HUVEC                                              | 5 h                  | FC>2.0                                                                                                                                             |
| Lanford RE et al. <i>Hepatology</i> . 2006;43(5):961-72.                                    | pIFN $\alpha$              | chimpanzee liver biopsies/PBMC                     | 4, 8, 24 h           | FC>2 at 4 h, FC>4 at 8 h, in liver only<br>FC>4 at 4 h in PBMC only<br>FC>2 at 4 h and 8 h in liver and PBMC<br>FC>4 at 4 h in primary hepatocytes |
| Leaman D et al. <i>J Interferon Cytokine Res</i> . 2003;23(12):745-56.                      | IFN $\alpha$ , IFN $\beta$ | human melanoma cell lines                          | 2, 8, 18 h           | FC>2.3                                                                                                                                             |
| Rani MR et al. <i>J Leukoc Biol</i> . 2007;82(5):1353-60.                                   | IFN $\beta$                | human PBMCs                                        | 2, 6, 12 h           | FC>2 at 6 h                                                                                                                                        |
| Sarasin-Filipowicz M et al. <i>PNAS</i> . 2008;105(19):7034-9.                              | pIFN $\alpha$              | human liver biopsies/PBMC                          | 4 h                  | FC>2 in liver from rapid responders                                                                                                                |

<sup>1</sup> pIFN $\alpha$  denotes pegylated IFN $\alpha$

<sup>2</sup> For liver and PBMC data sets, only genes appearing in 2 or more studies were included

<sup>3</sup> A total of 444 genes were compiled, of which 387 were available as sequence-validated Gateway-ready clones

**Supplementary Table 1.** ISG microarray data sets and inclusion criteria for screening. Ten publications with microarray data sets from various IFN-treated cell types or tissues were analyzed. Inclusion criteria: 1) only type I IFN-treated cells or tissues were included (type II IFN excluded), 2) only data from early time points (4, 6, or 8 h) were included, 3) for liver and PBMC data sets, only genes that appear in at least two or more studies were included, 4) only genes with fold changes greater than 2 or 4 were included (last column). With these inclusion criteria, a list of 444 genes were compiled, and 387 were available as sequence-validated Gateway-ready clones.

**Supplementary Tables 2-10.** Large scale ISG screens for viruses. Each table shows complete data sets from large scale screens for HCV, HIV, YFV, WNV, VEEV, and CHIKV in the indicated cell line. Data are ranked by percent infection normalized to Fluc or Gluc control starting with the strongest inhibitors in the first column. Z scores are included to show distribution. For WNV, VEEV, and CHIKV screens, the 100% normalization value was determined from the average of 3 independent preparations of Fluc.ires.TagRFP lentiviral pseudoparticles. Common ISG aliases: BST2 - tetherin, C19orf66 - FLJ11286, DDX58 - RIG-I, DDX60 - FLJ20035, DHX58 - LGP2, EIF2AK2 - PKR, IDO1 - INDO, IFI6 - G1P3 / 6-16, IFIH1 - MDA5, IFIT1 - ISG56, IFIT2 - ISG54, IFIT3 - ISG50, IFIT5 - ISG58, IFITM1 - 9-27, IFITM2 - 1-8D, IFITM3 - 1-8U, PSMB8 - LMP7, PSMB9 - LMP2, PSMB10 - MECL1, NAMPT - PBEF1, RSAD2 - viperin, ZBP1 - DAI, ZC3HAV1- ZAP.

Supplementary Table 2. Large scale ISG screen: HCV in Huh-7.5 cells at 48 h (page 1 of 2)

| Gene     | Percent  |         | Gene     | Percent  |         | Gene     | Percent  |         | Gene      | Percent  |         |
|----------|----------|---------|----------|----------|---------|----------|----------|---------|-----------|----------|---------|
|          | Infected | Z score |          | Infected | Z score |          | Infected | Z score |           | Infected | Z score |
| IFIH1    | 22.8     | -4.36   | CXCL9    | 66.9     | -0.97   | CREB3L3  | 73.5     | -0.46   | GTPBP1    | 77.7     | -0.13   |
| DDX58    | 24.2     | -4.25   | G6PC     | 66.9     | -0.97   | VAMP5    | 73.6     | -0.45   | CTCFL     | 77.9     | -0.12   |
| IRF1     | 30.9     | -3.74   | IGFBP2   | 67.0     | -0.96   | B2M      | 73.6     | -0.45   | SPTLC2    | 77.9     | -0.12   |
| IRF7     | 35.0     | -3.42   | OASL     | 67.0     | -0.96   | CD69     | 73.8     | -0.44   | IFI44L    | 78.0     | -0.11   |
| CCL2     | 51.4     | -2.16   | PDGFRL   | 67.0     | -0.96   | IRF9     | 73.9     | -0.43   | MT1X      | 78.1     | -0.10   |
| MKX      | 52.8     | -2.05   | CCL19    | 67.1     | -0.95   | SOCS1    | 73.9     | -0.43   | CCL4      | 78.2     | -0.09   |
| HSH2D    | 52.8     | -2.05   | GEM      | 67.6     | -0.91   | SOCS2    | 74.3     | -0.39   | IL28RA    | 78.3     | -0.09   |
| SLC1A1   | 54.5     | -1.92   | XAF1     | 68.0     | -0.88   | DEFB1    | 74.4     | -0.39   | CD9       | 78.3     | -0.09   |
| LRG1     | 54.6     | -1.91   | HLA-G    | 68.2     | -0.87   | CFB      | 74.5     | -0.38   | ZNF313    | 78.4     | -0.08   |
| SLFN5    | 55.6     | -1.83   | C5orf39  | 68.3     | -0.86   | IFI35    | 74.6     | -0.37   | FAM46C    | 78.5     | -0.07   |
| APOL2    | 56.1     | -1.80   | USP18    | 68.5     | -0.84   | APOL1    | 74.7     | -0.36   | RPL22     | 78.5     | -0.07   |
| FBXO6    | 56.3     | -1.78   | JUNB     | 68.6     | -0.84   | SLC25A28 | 74.9     | -0.35   | HLA-E     | 78.6     | -0.06   |
| MAB21L2  | 56.6     | -1.76   | C4orf33  | 68.6     | -0.84   | WARS     | 75.1     | -0.34   | NDC80     | 78.7     | -0.06   |
| IRF2     | 56.6     | -1.76   | SAT3     | 68.6     | -0.84   | CCL5     | 75.1     | -0.34   | RNASE4    | 78.8     | -0.05   |
| C22orf28 | 56.9     | -1.74   | TNFSF10  | 68.6     | -0.83   | C10orf10 | 75.1     | -0.33   | LINCR     | 78.9     | -0.04   |
| GZMB     | 57.4     | -1.70   | VEGFC    | 68.8     | -0.82   | IFITM2   | 75.1     | -0.33   | TRIM21    | 79.0     | -0.03   |
| TNFAIP6  | 58.3     | -1.63   | CD80     | 69.6     | -0.76   | IFIT1    | 75.1     | -0.33   | ADAMDEC1  | 79.1     | -0.02   |
| PI4K2B   | 58.4     | -1.62   | CCDC92   | 69.6     | -0.76   | FLJ39739 | 75.3     | -0.32   | HK2       | 79.2     | -0.02   |
| PBEF1    | 58.7     | -1.60   | C5orf27  | 69.7     | -0.75   | NUP50    | 75.3     | -0.32   | IFITM3    | 79.3     | -0.01   |
| CCDC109B | 59.3     | -1.56   | THBD     | 70.0     | -0.73   | MYD88    | 75.4     | -0.31   | GAK       | 79.4     | 0.00    |
| GK       | 59.5     | -1.54   | CCL8     | 70.0     | -0.73   | DYNLT1   | 75.5     | -0.30   | SP110     | 79.5     | 0.00    |
| IFIT5    | 59.6     | -1.53   | ETV7     | 70.3     | -0.70   | DTX3L    | 75.5     | -0.30   | ANKRD22   | 79.5     | 0.00    |
| ARG2     | 60.4     | -1.47   | MT1H     | 70.3     | -0.70   | NAPA     | 75.6     | -0.30   | SAA1      | 79.5     | 0.01    |
| MAFB     | 60.4     | -1.46   | NRN1     | 70.4     | -0.70   | CSDA     | 75.6     | -0.30   | CXCL10    | 79.6     | 0.01    |
| SIRPA    | 60.5     | -1.46   | C15orf48 | 70.4     | -0.69   | NOD2     | 75.6     | -0.30   | MT1G      | 79.7     | 0.02    |
| UPP2     | 60.8     | -1.44   | ADFP     | 70.5     | -0.69   | NT5C3    | 75.6     | -0.29   | C2orf31   | 79.8     | 0.03    |
| EIF2AK2  | 61.2     | -1.40   | DDIT4    | 70.8     | -0.67   | PMM2     | 75.6     | -0.29   | HESX1     | 79.9     | 0.04    |
| LAP3     | 61.5     | -1.39   | LY6E     | 70.9     | -0.66   | MT1F     | 75.7     | -0.29   | ABTB2     | 80.0     | 0.04    |
| GTPBP2   | 61.5     | -1.38   | TLR3     | 70.9     | -0.66   | S100A8   | 75.8     | -0.28   | GMPR      | 80.0     | 0.05    |
| BATF2    | 61.8     | -1.36   | P2RY6    | 71.0     | -0.65   | ISG15    | 75.8     | -0.28   | TNFRSF10A | 80.1     | 0.05    |
| GCH1     | 62.6     | -1.30   | GBP2     | 71.0     | -0.65   | CES1     | 75.9     | -0.27   | EIF3L     | 80.1     | 0.05    |
| SERPINE1 | 63.0     | -1.27   | AGPAT9   | 71.0     | -0.65   | IL17RB   | 75.9     | -0.27   | DCP1A     | 80.2     | 0.05    |
| PUS1     | 63.1     | -1.26   | NCF1     | 71.4     | -0.62   | FNDC4    | 76.0     | -0.27   | SMAD3     | 80.2     | 0.06    |
| PFKFB3   | 63.2     | -1.25   | EPSTI1   | 71.5     | -0.61   | MT1M     | 76.0     | -0.27   | BUB1      | 80.2     | 0.06    |
| MAP3K14  | 63.6     | -1.22   | AIM2     | 71.7     | -0.60   | NFIL3    | 76.1     | -0.25   | BTN3A3    | 80.3     | 0.07    |
| BCL2L14  | 63.7     | -1.21   | PNRC1    | 72.0     | -0.58   | PXK      | 76.2     | -0.25   | KIAA0040  | 80.3     | 0.07    |
| ANGPTL1  | 63.7     | -1.21   | STEAP4   | 72.1     | -0.57   | ENPP1    | 76.3     | -0.25   | PML       | 80.3     | 0.07    |
| PDK1     | 64.5     | -1.15   | LGALS9   | 72.1     | -0.57   | CASP7    | 76.4     | -0.23   | MAP3K5    | 80.5     | 0.08    |
| LGALS3   | 64.6     | -1.14   | PARP12   | 72.2     | -0.56   | HES4     | 76.4     | -0.23   | OAS2      | 80.6     | 0.09    |
| IFNGR1   | 65.1     | -1.10   | IFI44    | 72.3     | -0.55   | IFI30    | 76.4     | -0.23   | TRIM5     | 80.6     | 0.09    |
| SERPING1 | 65.3     | -1.09   | CMAH     | 72.4     | -0.54   | EPAS1    | 76.5     | -0.23   | MAFF      | 80.6     | 0.09    |
| CRP      | 65.3     | -1.09   | PRAME    | 72.4     | -0.54   | LGMN     | 76.5     | -0.23   | UBE2L6    | 81.0     | 0.12    |
| IMPA2    | 65.4     | -1.08   | CEBPD    | 72.4     | -0.54   | SSBP3    | 76.6     | -0.22   | RASSF4    | 81.0     | 0.12    |
| CYP1B1   | 65.5     | -1.08   | SECTM1   | 72.7     | -0.52   | PADI2    | 76.7     | -0.21   | TAP2      | 81.2     | 0.13    |
| ALDH1A1  | 65.5     | -1.07   | COMMD3   | 72.8     | -0.51   | PMAIP1   | 76.8     | -0.20   | CXCL11    | 81.2     | 0.13    |
| TMEM49   | 65.5     | -1.07   | TMEM51   | 73.1     | -0.49   | FLJ23556 | 76.8     | -0.20   | CDKN1A    | 81.3     | 0.14    |
| TNFSF13B | 65.6     | -1.07   | PCTK2    | 73.1     | -0.49   | EXT1     | 76.9     | -0.20   | ZBP1      | 81.3     | 0.14    |
| HPSE     | 65.7     | -1.06   | FAM125B  | 73.1     | -0.49   | KIAA1618 | 76.9     | -0.19   | CCDC75    | 81.4     | 0.15    |
| TYMP     | 66.5     | -1.00   | BLVRA    | 73.2     | -0.48   | MAX      | 77.2     | -0.17   | TREX1     | 81.5     | 0.15    |
| TRIM14   | 66.7     | -0.98   | FUT4     | 73.2     | -0.48   | SCARB2   | 77.6     | -0.14   | CCND3     | 81.5     | 0.16    |
| FAM70A   | 66.9     | -0.97   | TRIM38   | 73.3     | -0.47   | MTHFD2L  | 77.7     | -0.14   | CPT1A     | 81.5     | 0.16    |



Supplementary Table 2. Large scale ISG screen: HCV in Huh-7.5 cells at 48 h (page 2 of 2)

| Gene     | Percent  |         | Gene     | Percent  |         | Gene     | Percent  |         | Gene | Percent  |         |
|----------|----------|---------|----------|----------|---------|----------|----------|---------|------|----------|---------|
|          | Infected | Z score |          | Infected | Z score |          | Infected | Z score |      | Infected | Z score |
| CCR1     | 81.6     | 0.17    | TBX3     | 86.7     | 0.56    | SLC15A3  | 93.7     | 1.10    |      |          |         |
| CD74     | 81.7     | 0.17    | ISG20    | 86.8     | 0.56    | MX1      | 93.7     | 1.10    |      |          |         |
| DHX58    | 81.7     | 0.17    | CHMP5    | 86.9     | 0.57    | BCL3     | 94.4     | 1.16    |      |          |         |
| MSR1     | 81.7     | 0.18    | LAMP3    | 86.9     | 0.58    | EHD4     | 94.6     | 1.17    |      |          |         |
| TDRD7    | 81.8     | 0.18    | BAG1     | 87.0     | 0.58    | DUSP5    | 94.7     | 1.17    |      |          |         |
| HLA-C    | 81.9     | 0.19    | SNN      | 87.0     | 0.58    | AQP9     | 94.8     | 1.18    |      |          |         |
| THOC4    | 81.9     | 0.19    | IL6ST    | 87.3     | 0.60    | GBP4     | 94.8     | 1.19    |      |          |         |
| GLRX     | 82.1     | 0.20    | PHF11    | 87.5     | 0.62    | MCOLN2   | 95.0     | 1.20    |      |          |         |
| TLK2     | 82.1     | 0.20    | IFI6     | 87.6     | 0.63    | PPM1K    | 95.1     | 1.21    |      |          |         |
| STAP1    | 82.1     | 0.21    | UNC84B   | 87.7     | 0.63    | NCOA3    | 95.4     | 1.23    |      |          |         |
| ATP10D   | 82.3     | 0.22    | GBP5     | 87.8     | 0.64    | WHDC1    | 95.8     | 1.26    |      |          |         |
| SERPINB9 | 82.4     | 0.23    | PTMA     | 87.9     | 0.65    | BST2     | 95.9     | 1.27    |      |          |         |
| AMPH     | 82.4     | 0.23    | RARRES3  | 88.1     | 0.67    | CX3CL1   | 95.9     | 1.27    |      |          |         |
| SCO2     | 82.6     | 0.25    | MARCKS   | 88.2     | 0.67    | STARD5   | 96.2     | 1.29    |      |          |         |
| ADM      | 82.7     | 0.25    | ETV6     | 88.2     | 0.68    | TRIM34   | 96.4     | 1.30    |      |          |         |
| PHF15    | 82.8     | 0.26    | IL1RN    | 88.3     | 0.68    | TAGAP    | 96.9     | 1.35    |      |          |         |
| GPX2     | 82.9     | 0.26    | PPM1K    | 88.8     | 0.72    | ARNTL    | 97.1     | 1.36    |      |          |         |
| MX1      | 83.1     | 0.28    | FKBP5    | 89.0     | 0.74    | UNC93B1  | 97.4     | 1.38    |      |          |         |
| IFI27    | 83.2     | 0.29    | GBP1     | 89.1     | 0.74    | CLEC4D   | 97.5     | 1.39    |      |          |         |
| AXUD1    | 83.3     | 0.30    | MCL1     | 89.2     | 0.75    | C6orf150 | 97.5     | 1.39    |      |          |         |
| ANKFY1   | 83.4     | 0.30    | FFAR2    | 89.2     | 0.75    | SAMD4A   | 97.9     | 1.42    |      |          |         |
| CLEC2B   | 83.4     | 0.31    | IL1R     | 89.3     | 0.76    | SLC16A1  | 98.0     | 1.43    |      |          |         |
| IFIT3    | 83.8     | 0.33    | AKT3     | 89.4     | 0.77    | FAM134B  | 98.3     | 1.45    |      |          |         |
| IFI16    | 83.8     | 0.34    | AHNAK2   | 89.5     | 0.77    | HLA-F    | 98.7     | 1.48    |      |          |         |
| FNDC3B   | 84.0     | 0.35    | NPAS2    | 89.7     | 0.79    | FER1L3   | 98.7     | 1.48    |      |          |         |
| LMO2     | 84.1     | 0.36    | RNF19B   | 89.7     | 0.79    | IFITM3   | 98.7     | 1.48    |      |          |         |
| Gluc     | 84.1     | 0.36    | HEG1     | 89.7     | 0.79    | PRKD2    | 98.9     | 1.50    |      |          |         |
| PSCD1    | 84.2     | 0.37    | CCNA1    | 89.8     | 0.80    | PSMB9    | 98.9     | 1.50    |      |          |         |
| LIPA     | 84.3     | 0.37    | C1S      | 90.0     | 0.81    | OPTN     | 99.6     | 1.55    |      |          |         |
| PRIC285  | 84.4     | 0.38    | NMI      | 90.3     | 0.83    | ADAR     | 99.7     | 1.56    |      |          |         |
| IDO1     | 84.4     | 0.39    | DDX3X    | 90.4     | 0.84    | TNFAIP3  | 99.8     | 1.57    |      |          |         |
| TIMP1    | 84.5     | 0.39    | CLEC4E   | 90.5     | 0.85    | Fluc     | 100.0    | 1.58    |      |          |         |
| IFIT2    | 84.5     | 0.39    | ODC1     | 90.7     | 0.87    | ABLIM3   | 100.3    | 1.61    |      |          |         |
| RGS1     | 84.6     | 0.40    | JAK2     | 91.0     | 0.89    | STAT2    | 101.2    | 1.68    |      |          |         |
| ATF3     | 84.6     | 0.40    | PSMB8    | 91.1     | 0.90    | ARHGEF3  | 101.4    | 1.69    |      |          |         |
| HERC6    | 84.9     | 0.42    | ERLIN1   | 91.4     | 0.92    | MICB     | 101.7    | 1.72    |      |          |         |
| GCA      | 84.9     | 0.42    | GJA4     | 91.5     | 0.93    | RBCK1    | 102.5    | 1.78    |      |          |         |
| PIM3     | 85.0     | 0.43    | GBP3     | 91.5     | 0.93    | OGFR     | 102.6    | 1.79    |      |          |         |
| SAMHD1   | 85.1     | 0.43    | IL15     | 92.2     | 0.98    | ELF1     | 103.7    | 1.87    |      |          |         |
| PNPT1    | 85.3     | 0.45    | RIPK2    | 92.2     | 0.98    | CRY1     | 103.9    | 1.88    |      |          |         |
| SLC25A30 | 85.6     | 0.48    | ULK4     | 92.3     | 0.99    | DNAPT6   | 104.1    | 1.90    |      |          |         |
| IFI6     | 85.8     | 0.49    | IL15RA   | 92.6     | 1.02    | TRAFD1   | 104.4    | 1.92    |      |          |         |
| CD38     | 85.8     | 0.49    | CD274    | 92.7     | 1.02    | FAM46A   | 104.7    | 1.95    |      |          |         |
| SPSB1    | 85.9     | 0.50    | PLSCR1   | 92.7     | 1.02    | TRIM25   | 104.9    | 1.96    |      |          |         |
| STAT1    | 86.0     | 0.51    | MASTL    | 92.9     | 1.03    | GALNT2   | 106.1    | 2.05    |      |          |         |
| TMEM140  | 86.4     | 0.53    | C9orf91  | 93.0     | 1.04    | CD163    | 106.4    | 2.08    |      |          |         |
| ZNF385B  | 86.4     | 0.54    | TXNIP    | 93.2     | 1.06    | LEPR     | 108.2    | 2.22    |      |          |         |
| APOBEC3A | 86.5     | 0.55    | RTP4     | 93.2     | 1.06    | B4GALT5  | 109.6    | 2.32    |      |          |         |
| TCF7L2   | 86.6     | 0.55    | ACSL1    | 93.5     | 1.08    |          |          |         |      |          |         |
| TAP1     | 86.6     | 0.55    | KIAA0082 | 93.5     | 1.08    |          |          |         |      |          |         |
| FCGR1A   | 86.6     | 0.55    | C4orf32  | 93.5     | 1.08    |          |          |         |      |          |         |

Supplementary Table 3. Large scale ISG screen: HCV in Huh-7.5 cells at 72 h (page 1 of 2)

| Gene      | Percent  |         | Gene     | Percent  |         | Gene     | Percent  |         | Gene     | Percent  |         |
|-----------|----------|---------|----------|----------|---------|----------|----------|---------|----------|----------|---------|
|           | Infected | Z score |          | Infected | Z score |          | Infected | Z score |          | Infected | Z score |
| IRF1      | 27.8     | -7.08   | IFI30    | 85.5     | -0.83   | ARNTL    | 89.5     | -0.39   | MCOLN2   | 92.8     | -0.03   |
| IFIH1     | 42.1     | -5.53   | TNFAIP6  | 85.5     | -0.82   | NPAS2    | 89.6     | -0.39   | CLEC4E   | 92.8     | -0.03   |
| DDX58     | 43.1     | -5.43   | SIRPA    | 85.5     | -0.82   | PDK1     | 89.6     | -0.38   | EHD4     | 93.0     | -0.01   |
| IRF7      | 65.3     | -3.02   | SERPINE1 | 85.5     | -0.82   | THOC4    | 89.7     | -0.38   | PCTK2    | 93.0     | -0.01   |
| CCL2      | 65.8     | -2.96   | PSCD1    | 85.7     | -0.81   | MCL1     | 89.7     | -0.38   | STEAP4   | 93.1     | -0.01   |
| IRF2      | 65.9     | -2.95   | SSBP3    | 85.7     | -0.80   | SLFN5    | 89.7     | -0.37   | ACSL1    | 93.1     | 0.00    |
| MKX       | 72.1     | -2.28   | CCL19    | 85.9     | -0.78   | BAG1     | 89.7     | -0.37   | KIAA1618 | 93.1     | 0.00    |
| JUNB      | 72.2     | -2.27   | ALDH1A1  | 85.9     | -0.78   | CCNA1    | 89.7     | -0.37   | PMAIP1   | 93.2     | 0.01    |
| TNFRSF10A | 73.0     | -2.18   | IL28RA   | 86.2     | -0.75   | APOBEC3A | 89.9     | -0.35   | IFI6     | 93.3     | 0.02    |
| HSH2D     | 73.3     | -2.15   | IMPA2    | 86.3     | -0.74   | TMEM49   | 89.9     | -0.34   | IFIT1    | 93.3     | 0.02    |
| SERPINB9  | 74.3     | -2.04   | ADAMDEC1 | 86.4     | -0.73   | TCF7L2   | 90.0     | -0.34   | CLEC4D   | 93.4     | 0.03    |
| MTHFD2L   | 76.4     | -1.81   | TAP1     | 86.4     | -0.73   | AKT3     | 90.0     | -0.34   | KIAA0082 | 93.4     | 0.03    |
| NCF1      | 78.0     | -1.64   | CRP      | 86.5     | -0.72   | PPM1K    | 90.0     | -0.33   | PUS1     | 93.4     | 0.03    |
| C5orf39   | 78.0     | -1.64   | PFKFB3   | 86.7     | -0.69   | BLVRA    | 90.1     | -0.33   | HERC6    | 93.4     | 0.03    |
| MT1H      | 79.0     | -1.54   | MAP3K14  | 86.9     | -0.68   | GBP3     | 90.3     | -0.31   | HLA-G    | 93.5     | 0.04    |
| MT1F      | 79.3     | -1.50   | UNC84B   | 86.9     | -0.67   | C1S      | 90.3     | -0.30   | GLRX     | 93.8     | 0.07    |
| MT1M      | 79.6     | -1.46   | CXCL9    | 86.9     | -0.67   | FNDC3B   | 90.4     | -0.30   | G6PC     | 93.8     | 0.07    |
| C5orf27   | 79.7     | -1.45   | LGMM     | 87.0     | -0.67   | MYD88    | 90.5     | -0.28   | NDC80    | 93.8     | 0.08    |
| C22orf28  | 80.2     | -1.40   | FAM70A   | 87.0     | -0.66   | DYNLT1   | 90.6     | -0.28   | P2RY6    | 93.9     | 0.09    |
| FLJ23556  | 80.3     | -1.40   | ZBP1     | 87.1     | -0.66   | IFI35    | 90.6     | -0.27   | FUT4     | 94.1     | 0.11    |
| NT5C3     | 80.4     | -1.38   | CASP7    | 87.1     | -0.65   | GBP2     | 90.8     | -0.26   | TAGAP    | 94.2     | 0.11    |
| ARG2      | 80.4     | -1.38   | MT1G     | 87.1     | -0.65   | IGFBP2   | 90.8     | -0.25   | SOCS2    | 94.2     | 0.12    |
| SLC1A1    | 80.9     | -1.33   | SLC25A30 | 87.3     | -0.63   | AGPAT9   | 90.9     | -0.24   | IL15     | 94.2     | 0.12    |
| IRF9      | 81.0     | -1.31   | ZNF385B  | 87.4     | -0.62   | JAK2     | 91.1     | -0.22   | TMEM51   | 94.4     | 0.14    |
| TLR3      | 81.1     | -1.30   | CLEC2B   | 87.4     | -0.62   | GCH1     | 91.1     | -0.22   | TAP2     | 94.6     | 0.16    |
| UPP2      | 81.4     | -1.27   | CCL8     | 87.4     | -0.62   | HPSE     | 91.1     | -0.22   | TREX1    | 94.6     | 0.16    |
| IFIT5     | 81.5     | -1.26   | TIMP1    | 87.5     | -0.61   | PNRC1    | 91.2     | -0.21   | NAPA     | 94.6     | 0.16    |
| LGALS3    | 81.6     | -1.25   | HLA-C    | 87.5     | -0.61   | BATF2    | 91.3     | -0.20   | CD274    | 94.8     | 0.18    |
| FNDC4     | 81.7     | -1.24   | IFIT2    | 87.6     | -0.60   | AHNAK2   | 91.3     | -0.20   | TRIM34   | 94.9     | 0.19    |
| CEBPD     | 81.7     | -1.24   | RASSF4   | 88.0     | -0.56   | B2M      | 91.3     | -0.20   | CCL4     | 94.9     | 0.19    |
| CCND3     | 82.0     | -1.20   | Gluc     | 88.0     | -0.55   | CCL5     | 91.4     | -0.19   | TRIM14   | 94.9     | 0.19    |
| PBEF1     | 82.1     | -1.19   | GZMB     | 88.1     | -0.54   | SAT3     | 91.4     | -0.19   | PPM1K    | 94.9     | 0.20    |
| MAX       | 82.9     | -1.10   | C15orf48 | 88.2     | -0.54   | PDGFRL   | 91.5     | -0.17   | HK2      | 95.0     | 0.20    |
| PI4K2B    | 83.5     | -1.04   | TYMP     | 88.2     | -0.53   | USP18    | 91.6     | -0.17   | IFITM2   | 95.0     | 0.20    |
| NRN1      | 83.6     | -1.03   | ATP10D   | 88.3     | -0.52   | FBXO6    | 91.6     | -0.17   | C4orf33  | 95.0     | 0.20    |
| GK        | 83.8     | -1.01   | TNFSF10  | 88.4     | -0.52   | IFNGR1   | 91.6     | -0.17   | TNFSF13B | 95.0     | 0.20    |
| HLA-E     | 84.4     | -0.95   | SLC15A3  | 88.4     | -0.51   | DEFB1    | 91.7     | -0.15   | FLJ39739 | 95.1     | 0.21    |
| MAB21L2   | 84.4     | -0.94   | AIM2     | 88.4     | -0.51   | PTMA     | 91.7     | -0.15   | ETV6     | 95.1     | 0.22    |
| PNPT1     | 84.5     | -0.93   | STAP1    | 88.5     | -0.50   | BCL2L14  | 91.8     | -0.14   | CXCL11   | 95.2     | 0.23    |
| HES4      | 84.5     | -0.93   | CREB3L3  | 88.6     | -0.49   | GBP4     | 91.9     | -0.14   | MARCKS   | 95.2     | 0.23    |
| NMI       | 84.7     | -0.91   | IFITM3   | 88.7     | -0.48   | CCDC109B | 92.0     | -0.13   | ANGPTL1  | 95.2     | 0.23    |
| LIPA      | 84.8     | -0.91   | RARRES3  | 88.7     | -0.47   | MT1X     | 92.1     | -0.11   | IFI44    | 95.2     | 0.23    |
| GTPBP2    | 85.0     | -0.88   | IL1R     | 88.8     | -0.47   | CMAH     | 92.2     | -0.10   | ERLIN1   | 95.3     | 0.24    |
| STAT1     | 85.0     | -0.88   | GCA      | 88.8     | -0.47   | VAMP5    | 92.4     | -0.08   | PRAME    | 95.5     | 0.25    |
| LRG1      | 85.1     | -0.87   | APOL2    | 88.8     | -0.47   | C6orf150 | 92.4     | -0.08   | GTPBP1   | 95.6     | 0.27    |
| DDIT4     | 85.2     | -0.86   | IL1RN    | 89.0     | -0.44   | DUSP5    | 92.6     | -0.06   | NCOA3    | 95.7     | 0.28    |
| LAP3      | 85.2     | -0.85   | MAFB     | 89.0     | -0.44   | TBX3     | 92.6     | -0.05   | IFI44L   | 95.8     | 0.29    |
| NOD2      | 85.3     | -0.85   | CYP1B1   | 89.1     | -0.44   | FER1L3   | 92.7     | -0.04   | IFI27    | 95.8     | 0.29    |
| GAK       | 85.3     | -0.85   | ADFP     | 89.2     | -0.43   | C2orf31  | 92.8     | -0.04   | TRIM38   | 95.9     | 0.30    |
| ADM       | 85.3     | -0.85   | MX1      | 89.3     | -0.42   | C10orf10 | 92.8     | -0.04   | WHDC1    | 96.0     | 0.31    |
| SLC25A28  | 85.4     | -0.83   | IL6ST    | 89.3     | -0.41   | ATF3     | 92.8     | -0.03   | VEGFC    | 96.0     | 0.31    |

Supplementary Table 3. Large scale ISG screen: HCV in Huh-7.5 cells at 72 h (page 2 of 2)

| Gene     | Percent  |         | Gene    | Percent  |         | Gene    | Percent  |         | Gene | Percent  |         |
|----------|----------|---------|---------|----------|---------|---------|----------|---------|------|----------|---------|
|          | Infected | Z score |         | Infected | Z score |         | Infected | Z score |      | Infected | Z score |
| CRY1     | 96.0     | 0.31    | TRIM5   | 99.0     | 0.64    | CD74    | 101.6    | 0.92    |      |          |         |
| CXCL10   | 96.1     | 0.32    | ARHGEF3 | 99.2     | 0.66    | SOCS1   | 101.7    | 0.93    |      |          |         |
| AQP9     | 96.1     | 0.32    | DTX3L   | 99.2     | 0.66    | C4orf32 | 101.8    | 0.94    |      |          |         |
| EPST1    | 96.3     | 0.34    | TFEC    | 99.3     | 0.67    | NFIL3   | 101.8    | 0.94    |      |          |         |
| PADI2    | 96.4     | 0.36    | SAMD4A  | 99.4     | 0.68    | TNFAIP3 | 101.8    | 0.94    |      |          |         |
| FAM125B  | 96.5     | 0.36    | RBM25   | 99.4     | 0.68    | AMPH    | 101.8    | 0.94    |      |          |         |
| PRIC285  | 96.5     | 0.37    | OGFR    | 99.5     | 0.69    | ULK4    | 101.9    | 0.95    |      |          |         |
| CCDC92   | 96.5     | 0.37    | TRAFD1  | 99.5     | 0.69    | PHF15   | 102.1    | 0.97    |      |          |         |
| PXK      | 96.5     | 0.37    | SAA1    | 99.7     | 0.71    | MAP3K5  | 102.3    | 0.99    |      |          |         |
| GJA4     | 96.6     | 0.38    | DDX3X   | 99.7     | 0.71    | SCO2    | 102.4    | 1.01    |      |          |         |
| LINCR    | 96.6     | 0.38    | HESX1   | 99.7     | 0.72    | CD9     | 102.5    | 1.01    |      |          |         |
| SECTM1   | 96.6     | 0.38    | MAFF    | 99.8     | 0.72    | BUB1    | 102.6    | 1.03    |      |          |         |
| ISG15    | 96.7     | 0.39    | CDKN1A  | 99.8     | 0.73    | DHX58   | 102.7    | 1.04    |      |          |         |
| EIF3L    | 96.8     | 0.40    | EXT1    | 99.9     | 0.73    | LMO2    | 102.7    | 1.04    |      |          |         |
| DCP1A    | 96.8     | 0.40    | MASTL   | 100.0    | 0.74    | CD38    | 102.8    | 1.05    |      |          |         |
| UNC93B1  | 96.9     | 0.41    | GBP1    | 100.0    | 0.74    | FAM134B | 102.8    | 1.05    |      |          |         |
| IL15RA   | 96.9     | 0.41    | DNATP6  | 100.0    | 0.74    | SP110   | 102.8    | 1.05    |      |          |         |
| XAF1     | 97.0     | 0.42    | Fluc    | 100.0    | 0.75    | BCL3    | 102.9    | 1.06    |      |          |         |
| UBE2L6   | 97.0     | 0.42    | IFIT3   | 100.0    | 0.75    | ADAR    | 102.9    | 1.06    |      |          |         |
| LY6E     | 97.1     | 0.43    | GEM     | 100.1    | 0.75    | PSMB8   | 102.9    | 1.06    |      |          |         |
| HLA-F    | 97.2     | 0.44    | SLC16A1 | 100.1    | 0.75    | AXUD1   | 103.0    | 1.07    |      |          |         |
| CFB      | 97.4     | 0.47    | ETV7    | 100.1    | 0.76    | PSMB9   | 103.8    | 1.15    |      |          |         |
| ODC1     | 97.4     | 0.47    | ABLIM3  | 100.2    | 0.76    | SAMHD1  | 103.8    | 1.15    |      |          |         |
| RBCK1    | 97.5     | 0.47    | TRIM21  | 100.2    | 0.77    | ANKFY1  | 103.8    | 1.16    |      |          |         |
| ANKRD22  | 97.5     | 0.47    | PARP12  | 100.3    | 0.78    | TRIM25  | 103.8    | 1.16    |      |          |         |
| PMM2     | 97.5     | 0.48    | BTN3A3  | 100.3    | 0.78    | TMEM140 | 103.9    | 1.17    |      |          |         |
| CX3CL1   | 97.6     | 0.48    | FFAR2   | 100.3    | 0.78    | ZNF313  | 104.0    | 1.18    |      |          |         |
| KIAA0040 | 97.6     | 0.49    | CD80    | 100.4    | 0.79    | GBP5    | 104.1    | 1.19    |      |          |         |
| S100A8   | 97.7     | 0.49    | STARD5  | 100.4    | 0.79    | TLK2    | 104.2    | 1.20    |      |          |         |
| CPT1A    | 97.7     | 0.49    | SMAD3   | 100.4    | 0.79    | IFITM3  | 104.2    | 1.20    |      |          |         |
| IL17RB   | 97.8     | 0.51    | RNF19B  | 100.5    | 0.79    | LAMP3   | 104.2    | 1.20    |      |          |         |
| SERPING1 | 97.8     | 0.51    | HEG1    | 100.5    | 0.80    | B4GALT5 | 104.2    | 1.20    |      |          |         |
| GMPR     | 97.9     | 0.51    | ABTB2   | 100.5    | 0.80    | FCGR1A  | 104.3    | 1.21    |      |          |         |
| ENPP1    | 98.0     | 0.53    | NUP50   | 100.6    | 0.81    | PHF11   | 104.3    | 1.21    |      |          |         |
| MICB     | 98.0     | 0.53    | STAT2   | 100.7    | 0.82    | CCR1    | 104.4    | 1.22    |      |          |         |
| OASL     | 98.2     | 0.55    | CCDC75  | 100.7    | 0.82    | GPX2    | 104.5    | 1.24    |      |          |         |
| TDRD7    | 98.2     | 0.55    | EPAS1   | 100.7    | 0.82    | CD163   | 104.7    | 1.25    |      |          |         |
| THBD     | 98.2     | 0.55    | RIPK2   | 100.8    | 0.83    | MX1     | 104.8    | 1.27    |      |          |         |
| COMMD3   | 98.3     | 0.56    | LGALS9  | 100.8    | 0.83    | FAM46A  | 104.8    | 1.27    |      |          |         |
| CTCF     | 98.3     | 0.56    | RPL22   | 100.9    | 0.84    | CSDA    | 105.4    | 1.33    |      |          |         |
| SPSB1    | 98.3     | 0.56    | IFI6    | 100.9    | 0.84    | FAM46C  | 105.5    | 1.34    |      |          |         |
| C9orf91  | 98.3     | 0.56    | MSR1    | 100.9    | 0.85    | CHMP5   | 105.6    | 1.35    |      |          |         |
| CES1     | 98.3     | 0.56    | GALNT2  | 101.0    | 0.85    | PML     | 105.7    | 1.36    |      |          |         |
| ELF1     | 98.4     | 0.57    | CD69    | 101.0    | 0.85    | ISG20   | 105.7    | 1.36    |      |          |         |
| OPTN     | 98.4     | 0.57    | IFI16   | 101.1    | 0.86    | SPTLC2  | 105.9    | 1.39    |      |          |         |
| APOL1    | 98.6     | 0.59    | PIM3    | 101.2    | 0.87    | PLSCR1  | 106.7    | 1.48    |      |          |         |
| RGS1     | 98.6     | 0.60    | SCARB2  | 101.2    | 0.87    | RTP4    | 108.0    | 1.61    |      |          |         |
| WARS     | 98.7     | 0.61    | RNASE4  | 101.3    | 0.89    | IDO1    | 108.1    | 1.62    |      |          |         |
| LEPR     | 98.8     | 0.61    | PRKD2   | 101.4    | 0.90    | BST2    | 108.9    | 1.71    |      |          |         |
| FKBP5    | 98.9     | 0.62    | SNN     | 101.4    | 0.90    |         |          |         |      |          |         |
| OAS2     | 98.9     | 0.63    | TXNIP   | 101.4    | 0.90    |         |          |         |      |          |         |

Supplementary Table 4. Large scale ISG screen: HCV in Huh-7 cells at 48 h (page 1 of 2)

| Gene     | Percent  |         | Gene     | Percent  |         | Gene      | Percent  |         | Gene     | Percent  |         |
|----------|----------|---------|----------|----------|---------|-----------|----------|---------|----------|----------|---------|
|          | Infected | Z score |          | Infected | Z score |           | Infected | Z score |          | Infected | Z score |
| IRF1     | 36.1     | -3.24   | PADI2    | 75.2     | -0.95   | PRIC285   | 81.9     | -0.56   | MASTL    | 87.4     | -0.24   |
| IRF2     | 39.4     | -3.05   | BCL2L14  | 75.2     | -0.95   | PLEKHA4   | 81.9     | -0.56   | FAM125B  | 87.8     | -0.22   |
| SLC1A1   | 44.5     | -2.75   | SAT3     | 75.2     | -0.95   | TIMP1     | 82.3     | -0.54   | FNDC3B   | 87.8     | -0.22   |
| DDX58    | 49.2     | -2.47   | TAP2     | 75.2     | -0.95   | PNPT1     | 82.3     | -0.54   | HPSE     | 88.2     | -0.19   |
| MAP3K14  | 53.9     | -2.20   | TLR3     | 75.2     | -0.95   | TYMP      | 82.7     | -0.52   | CCL19    | 88.2     | -0.19   |
| IRF7     | 55.1     | -2.13   | UNC84B   | 75.6     | -0.93   | THOC4     | 82.7     | -0.52   | RARRES3  | 88.2     | -0.19   |
| TRIM14   | 58.3     | -1.94   | BTN3A3   | 75.6     | -0.93   | CD69      | 82.7     | -0.52   | FBXO6    | 88.2     | -0.19   |
| DDIT4    | 61.0     | -1.78   | IFNGR1   | 75.6     | -0.93   | IFI30     | 83.1     | -0.49   | SLFN5    | 88.2     | -0.19   |
| NT5C3    | 61.8     | -1.74   | CTCFL    | 76.0     | -0.91   | SERPING1  | 83.1     | -0.49   | MCL1     | 88.6     | -0.17   |
| SSBP3    | 63.8     | -1.62   | PCTK2    | 76.0     | -0.91   | PUS1      | 83.1     | -0.49   | IFI6     | 88.6     | -0.17   |
| IFIH1    | 64.6     | -1.58   | BUB1     | 76.0     | -0.91   | SAMHD1    | 83.1     | -0.49   | IRF9     | 89.0     | -0.15   |
| LG MN    | 66.1     | -1.48   | LGALS3   | 76.4     | -0.88   | EXT1      | 83.1     | -0.49   | ACSL1    | 89.0     | -0.15   |
| GBP2     | 66.5     | -1.46   | CEBP D   | 76.8     | -0.86   | CFB       | 83.1     | -0.49   | MAX      | 89.4     | -0.12   |
| ZBP1     | 67.3     | -1.41   | IFIT5    | 76.8     | -0.86   | UBE2L6    | 83.5     | -0.47   | MICB     | 89.4     | -0.12   |
| TREX1    | 67.7     | -1.39   | PBEF1    | 76.8     | -0.86   | IL28RA    | 83.5     | -0.47   | DEFB1    | 89.4     | -0.12   |
| SOCS2    | 67.7     | -1.39   | BAG1     | 77.2     | -0.84   | IFI27     | 83.5     | -0.47   | FCGR1A   | 89.4     | -0.12   |
| BLVRA    | 68.1     | -1.37   | BATF2    | 77.2     | -0.84   | IFI6      | 83.5     | -0.47   | CD274    | 89.4     | -0.12   |
| PPM1K    | 68.1     | -1.37   | MS4A4A   | 77.2     | -0.84   | ENPP1     | 83.5     | -0.47   | GEM      | 89.4     | -0.12   |
| PARP12   | 68.1     | -1.37   | MAB21L2  | 77.6     | -0.82   | DDX3X     | 83.5     | -0.47   | RIPK2    | 89.4     | -0.12   |
| IFI44L   | 68.1     | -1.37   | FLJ23556 | 77.6     | -0.82   | APOL2     | 83.9     | -0.45   | SERPINB9 | 90.2     | -0.08   |
| MT1H     | 68.9     | -1.32   | MTHFD2L  | 77.6     | -0.82   | NMI       | 83.9     | -0.45   | HSH2D    | 90.2     | -0.08   |
| FNDC4    | 68.9     | -1.32   | PDK1     | 77.6     | -0.82   | HLA-F     | 84.3     | -0.42   | ANKRD22  | 90.2     | -0.08   |
| NPAS2    | 68.9     | -1.32   | LRG1     | 78.0     | -0.79   | B2M       | 84.3     | -0.42   | CXCL10   | 90.6     | -0.05   |
| NOD2     | 69.3     | -1.30   | GTPBP2   | 78.0     | -0.79   | CPT1A     | 84.3     | -0.42   | STAT1    | 90.6     | -0.05   |
| MKX      | 69.3     | -1.30   | ARG2     | 78.0     | -0.79   | STAP1     | 84.6     | -0.40   | CCL4     | 90.6     | -0.05   |
| OASL     | 69.3     | -1.30   | AKT3     | 78.3     | -0.77   | ATF3      | 84.6     | -0.40   | CLEC2B   | 90.6     | -0.05   |
| MT1F     | 69.7     | -1.28   | GTPBP1   | 78.7     | -0.75   | CRP       | 84.6     | -0.40   | TMEM49   | 90.6     | -0.05   |
| ADM      | 70.1     | -1.25   | PPM1K    | 78.7     | -0.75   | NCF1      | 85.0     | -0.38   | RNF19B   | 90.6     | -0.05   |
| C5orf27  | 70.5     | -1.23   | GZMB     | 78.7     | -0.75   | MX1       | 85.0     | -0.38   | CASP7    | 90.6     | -0.05   |
| ZNF385B  | 70.5     | -1.23   | NAPA     | 78.7     | -0.75   | UPP2      | 85.0     | -0.38   | WHDC1    | 90.6     | -0.05   |
| PSCD1    | 70.5     | -1.23   | CCL2     | 79.1     | -0.72   | AMPH      | 85.0     | -0.38   | DNAPT P6 | 90.6     | -0.05   |
| DCP1A    | 70.5     | -1.23   | SIRPA    | 79.1     | -0.72   | TAP1      | 85.0     | -0.38   | RASSF4   | 90.9     | -0.03   |
| ALDH1A1  | 70.9     | -1.21   | CLEC4E   | 79.1     | -0.72   | IL1RN     | 85.4     | -0.35   | IFIT2    | 90.9     | -0.03   |
| LIPA     | 71.3     | -1.18   | TDRD7    | 79.1     | -0.72   | CCL8      | 85.4     | -0.35   | IFI16    | 90.9     | -0.03   |
| NDC80    | 71.3     | -1.18   | ISG15    | 79.5     | -0.70   | DTX3L     | 85.4     | -0.35   | USP18    | 91.3     | -0.01   |
| CYP1B1   | 71.7     | -1.16   | C2orf31  | 79.5     | -0.70   | LINC R    | 85.8     | -0.33   | IL17RB   | 91.3     | -0.01   |
| ADFP     | 71.7     | -1.16   | COMMD3   | 79.5     | -0.70   | TAGAP     | 85.8     | -0.33   | CX3CL1   | 91.3     | -0.01   |
| C22orf28 | 72.4     | -1.11   | OAS2     | 79.9     | -0.68   | PHF15     | 85.8     | -0.33   | ZNF313   | 91.3     | -0.01   |
| TNFSF10  | 72.4     | -1.11   | CXCL11   | 79.9     | -0.68   | TNFRSF10A | 85.8     | -0.33   | ANGPTL1  | 91.7     | 0.01    |
| S100A8   | 72.8     | -1.09   | C10orf10 | 80.3     | -0.65   | GPX2      | 86.2     | -0.31   | CD9      | 92.1     | 0.04    |
| MT1M     | 73.2     | -1.07   | C4orf33  | 80.3     | -0.65   | GCH1      | 86.2     | -0.31   | HERC6    | 92.1     | 0.04    |
| DYNLT1   | 73.2     | -1.07   | PFKFB3   | 80.7     | -0.63   | ABTB2     | 86.2     | -0.31   | IFITM3   | 92.5     | 0.06    |
| PI4K2B   | 73.2     | -1.07   | SAA1     | 80.7     | -0.63   | EPAS1     | 86.2     | -0.31   | RTP4     | 92.5     | 0.06    |
| DUSP5    | 73.2     | -1.07   | SP110    | 80.7     | -0.63   | IFITM3    | 86.6     | -0.28   | Gluc     | 92.9     | 0.08    |
| SMAD3    | 73.6     | -1.05   | PMAIP1   | 81.1     | -0.61   | G6PC      | 86.6     | -0.28   | PHF11    | 92.9     | 0.08    |
| MYD88    | 74.0     | -1.02   | CCNA1    | 81.1     | -0.61   | TNFSF13B  | 86.6     | -0.28   | MT1X     | 93.3     | 0.11    |
| GK       | 74.0     | -1.02   | LAP3     | 81.5     | -0.58   | GBP5      | 86.6     | -0.28   | SLC15A3  | 93.3     | 0.11    |
| KIAA1618 | 74.4     | -1.00   | CDKN1A   | 81.5     | -0.58   | TRIM34    | 86.6     | -0.28   | RSAD2    | 93.3     | 0.11    |
| SLC25A28 | 74.8     | -0.98   | SOCS1    | 81.5     | -0.58   | UNC93B1   | 87.4     | -0.24   | C15orf48 | 93.7     | 0.13    |
| CCDC109B | 74.8     | -0.98   | KIAA0040 | 81.5     | -0.58   | LY6E      | 87.4     | -0.24   | ULK4     | 93.7     | 0.13    |
| MT1G     | 75.2     | -0.95   | HLA-E    | 81.9     | -0.56   | HK2       | 87.4     | -0.24   | DHX58    | 94.1     | 0.15    |

Supplementary Table 4. Large scale ISG screen: HCV in Huh-7 cells at 48 h (page 2 of 2)

| Gene     | Percent  |         | Gene     | Percent  |         | Gene     | Percent  |         | Gene   | Percent  |         |
|----------|----------|---------|----------|----------|---------|----------|----------|---------|--------|----------|---------|
|          | Infected | Z score |          | Infected | Z score |          | Infected | Z score |        | Infected | Z score |
| AXUD1    | 94.1     | 0.15    | CLEC4D   | 99.2     | 0.45    | TRIM5    | 107.1    | 0.91    | FFAR2  | 135.0    | 2.55    |
| FAM46C   | 94.1     | 0.15    | STEAP4   | 99.2     | 0.45    | HEG1     | 107.5    | 0.94    | SAMD4A | 135.4    | 2.57    |
| FER1L3   | 94.1     | 0.15    | JUNB     | 99.6     | 0.48    | XAF1     | 107.5    | 0.94    | SPSB1  | 137.8    | 2.71    |
| TLR7     | 94.1     | 0.15    | IL6ST    | 99.6     | 0.48    | CMAH     | 107.9    | 0.96    |        |          |         |
| EIF3L    | 94.5     | 0.18    | Fluc     | 100.0    | 0.50    | C6orf150 | 107.9    | 0.96    |        |          |         |
| IMPA2    | 94.5     | 0.18    | PXK      | 100.4    | 0.52    | IL15RA   | 107.9    | 0.96    |        |          |         |
| KIAA0082 | 94.5     | 0.18    | ETV7     | 100.4    | 0.52    | PMM2     | 108.3    | 0.98    |        |          |         |
| CCL5     | 94.9     | 0.20    | HLA-C    | 100.8    | 0.54    | WARS     | 108.3    | 0.98    |        |          |         |
| PRAME    | 95.3     | 0.22    | ERLIN1   | 100.8    | 0.54    | P2RY6    | 108.3    | 0.98    |        |          |         |
| GBP4     | 95.3     | 0.22    | NUP50    | 100.8    | 0.54    | MSR1     | 109.8    | 1.07    |        |          |         |
| ABLIM3   | 95.3     | 0.22    | GBP1     | 100.8    | 0.54    | LMO2     | 111.0    | 1.14    |        |          |         |
| AHNAK2   | 95.3     | 0.22    | MX1      | 100.8    | 0.54    | RBCK1    | 111.0    | 1.14    |        |          |         |
| IGFBP2   | 95.7     | 0.25    | ATP10D   | 101.6    | 0.59    | FAM134B  | 111.0    | 1.14    |        |          |         |
| FUT4     | 95.7     | 0.25    | SLC16A1  | 101.6    | 0.59    | TRIM25   | 111.0    | 1.14    |        |          |         |
| IFITM2   | 95.7     | 0.25    | TRIM38   | 101.6    | 0.59    | IDO1     | 112.2    | 1.21    |        |          |         |
| THBD     | 95.7     | 0.25    | PLSCR1   | 101.6    | 0.59    | TBX3     | 112.6    | 1.24    |        |          |         |
| AGPAT9   | 95.7     | 0.25    | MAFB     | 102.0    | 0.61    | BCL3     | 113.4    | 1.28    |        |          |         |
| CCDC92   | 95.7     | 0.25    | GLRX     | 102.0    | 0.61    | GALNT2   | 113.8    | 1.31    |        |          |         |
| IL1R     | 95.7     | 0.25    | JAK2     | 102.0    | 0.61    | SPTLC2   | 113.8    | 1.31    |        |          |         |
| NFIL3    | 95.7     | 0.25    | IL15     | 102.0    | 0.61    | APOL6    | 113.8    | 1.31    |        |          |         |
| B4GALT5  | 95.7     | 0.25    | OPTN     | 102.4    | 0.64    | APOBEC3A | 114.2    | 1.33    |        |          |         |
| HES4     | 96.1     | 0.27    | ANKFY1   | 102.4    | 0.64    | FAM46A   | 115.0    | 1.37    |        |          |         |
| CRY1     | 96.1     | 0.27    | EHD4     | 102.8    | 0.66    | FKBP5    | 115.7    | 1.42    |        |          |         |
| TNFAIP6  | 96.1     | 0.27    | HLA-G    | 102.8    | 0.66    | CCDC75   | 116.9    | 1.49    |        |          |         |
| VEGFC    | 96.5     | 0.29    | LEPR     | 102.8    | 0.66    | GBP3     | 117.3    | 1.51    |        |          |         |
| ADAMDEC1 | 96.5     | 0.29    | CD74     | 103.1    | 0.68    | MAFF     | 117.3    | 1.51    |        |          |         |
| ARNTL    | 96.5     | 0.29    | CREB3L3  | 103.1    | 0.68    | GCA      | 117.7    | 1.54    |        |          |         |
| GJA4     | 96.5     | 0.29    | C1S      | 103.1    | 0.68    | C4orf32  | 117.7    | 1.54    |        |          |         |
| CES1     | 96.9     | 0.31    | C9orf91  | 103.1    | 0.68    | RAB27A   | 117.7    | 1.54    |        |          |         |
| LAMP3    | 97.2     | 0.34    | PSMB8    | 103.1    | 0.68    | PSMB9    | 118.5    | 1.58    |        |          |         |
| CXCL9    | 97.6     | 0.36    | SCO2     | 103.5    | 0.71    | STARD5   | 118.9    | 1.60    |        |          |         |
| GAK      | 97.6     | 0.36    | SCARB2   | 103.5    | 0.71    | CSDA     | 119.3    | 1.63    |        |          |         |
| AQP9     | 97.6     | 0.36    | AIM2     | 103.5    | 0.71    | CD163    | 120.5    | 1.70    |        |          |         |
| PTMA     | 97.6     | 0.36    | EPST11   | 103.5    | 0.71    | RNF24    | 120.5    | 1.70    |        |          |         |
| SNN      | 97.6     | 0.36    | IFI44    | 103.5    | 0.71    | TMEM140  | 120.9    | 1.72    |        |          |         |
| MAP3K5   | 97.6     | 0.36    | CHMP5    | 103.5    | 0.71    | TNFAIP3  | 121.3    | 1.74    |        |          |         |
| SERPINE1 | 98.0     | 0.38    | NRN1     | 103.9    | 0.73    | GMPR     | 121.7    | 1.77    |        |          |         |
| VAMP5    | 98.0     | 0.38    | OGFR     | 104.3    | 0.75    | ISG20    | 122.8    | 1.84    |        |          |         |
| TMEM51   | 98.0     | 0.38    | LGALS9   | 104.7    | 0.78    | CCR1     | 123.6    | 1.88    |        |          |         |
| ARHGEF3  | 98.0     | 0.38    | IFIT3    | 104.7    | 0.78    | IFITM1   | 124.8    | 1.95    |        |          |         |
| PML      | 98.0     | 0.38    | RGS1     | 105.1    | 0.80    | NCOA3    | 125.2    | 1.97    |        |          |         |
| MX2      | 98.0     | 0.38    | CD80     | 105.1    | 0.80    | TXNIP    | 127.6    | 2.11    |        |          |         |
| ODC1     | 98.0     | 0.38    | FLJ39739 | 105.5    | 0.82    | TRIM21   | 127.6    | 2.11    |        |          |         |
| TCF7L2   | 98.0     | 0.38    | APOL1    | 105.5    | 0.82    | ADAR     | 128.7    | 2.18    |        |          |         |
| IFIT1    | 98.4     | 0.41    | TRAFD1   | 105.5    | 0.82    | RPL22    | 129.5    | 2.23    |        |          |         |
| MCOLN2   | 98.4     | 0.41    | PDGFRL   | 106.3    | 0.87    | ETV6     | 129.9    | 2.25    |        |          |         |
| RNASE4   | 98.4     | 0.41    | STAT2    | 106.3    | 0.87    | TFEC     | 129.9    | 2.25    |        |          |         |
| FAM70A   | 98.4     | 0.41    | PNRC1    | 106.7    | 0.89    | MARCKS   | 130.3    | 2.27    |        |          |         |
| IFI35    | 98.4     | 0.41    | PRKD2    | 106.7    | 0.89    | CD38     | 131.5    | 2.34    |        |          |         |
| SLC25A30 | 98.8     | 0.43    | HESX1    | 106.7    | 0.89    | PIM3     | 131.9    | 2.37    |        |          |         |
| SECTM1   | 99.2     | 0.45    | CCND3    | 107.1    | 0.91    | C9orf19  | 132.3    | 2.39    |        |          |         |

Supplementary Table 5. Large scale ISG screen: YFV in STAT1<sup>-/-</sup> fibroblasts at 24 h (page 1 of 2)

| Gene      | Percent  |         | Gene     | Percent  |         | Gene     | Percent  |         | Gene     | Percent  |         |
|-----------|----------|---------|----------|----------|---------|----------|----------|---------|----------|----------|---------|
|           | Infected | Z score |          | Infected | Z score |          | Infected | Z score |          | Infected | Z score |
| HPSE      | 12.3     | -4.56   | C4orf33  | 76.2     | -0.87   | GBP3     | 83.9     | -0.42   | PRKD2    | 89.9     | -0.08   |
| IFI6      | 25.2     | -3.81   | CCDC92   | 76.4     | -0.85   | PLSCR1   | 83.9     | -0.42   | IFIT2    | 89.9     | -0.08   |
| TNFRSF10A | 26.4     | -3.74   | GZMB     | 76.7     | -0.84   | MX1      | 83.9     | -0.42   | FKBP5    | 89.9     | -0.08   |
| IFI6      | 28.5     | -3.62   | MT1M     | 77.7     | -0.78   | CCL8     | 84.2     | -0.41   | BAG1     | 90.2     | -0.06   |
| IRF1      | 35.0     | -3.25   | IFITM2   | 78.0     | -0.76   | DYNLT1   | 84.2     | -0.41   | PBEF1    | 90.4     | -0.05   |
| C6orf150  | 43.5     | -2.75   | PSMB9    | 78.0     | -0.76   | LMO2     | 84.2     | -0.41   | FAM125B  | 90.4     | -0.05   |
| RTP4      | 45.6     | -2.63   | LRG1     | 79.3     | -0.69   | UBE2L6   | 84.5     | -0.39   | TMEM140  | 90.4     | -0.05   |
| IFITM3    | 51.0     | -2.32   | TNFSF10  | 79.3     | -0.69   | C4orf32  | 84.5     | -0.39   | DDX58    | 90.4     | -0.05   |
| IRF2      | 54.7     | -2.11   | UPP2     | 79.5     | -0.68   | NRN1     | 84.7     | -0.38   | B2M      | 90.7     | -0.03   |
| IFITM3    | 54.9     | -2.10   | ETV7     | 79.5     | -0.68   | TNFSF13B | 84.7     | -0.38   | IMPA2    | 90.7     | -0.03   |
| IRF7      | 57.8     | -1.93   | CD9      | 79.5     | -0.68   | RASSF4   | 84.7     | -0.38   | RGS1     | 90.9     | -0.02   |
| TREX1     | 57.8     | -1.93   | TXNIP    | 79.5     | -0.68   | FAM134B  | 84.7     | -0.38   | CHMP5    | 90.9     | -0.02   |
| ZBP1      | 59.1     | -1.86   | ANKRD22  | 79.5     | -0.68   | GBP1     | 84.7     | -0.38   | HLA-G    | 91.2     | 0.00    |
| TRIM25    | 64.2     | -1.56   | PPM1K    | 79.8     | -0.66   | CRP      | 85.0     | -0.36   | FNDC4    | 91.5     | 0.01    |
| GCH1      | 65.3     | -1.50   | HLA-E    | 80.1     | -0.65   | APOBEC3A | 85.2     | -0.35   | TMEM49   | 91.5     | 0.01    |
| CCL5      | 66.6     | -1.42   | CCDC109B | 80.1     | -0.65   | CCL19    | 85.5     | -0.33   | MICB     | 91.5     | 0.01    |
| IL28RA    | 66.6     | -1.42   | CREB3L3  | 80.1     | -0.65   | IFI30    | 85.5     | -0.33   | AIM2     | 91.5     | 0.01    |
| CYP1B1    | 67.6     | -1.36   | CLEC2B   | 80.1     | -0.65   | GTPBP1   | 85.8     | -0.32   | STARD5   | 91.5     | 0.01    |
| CCL2      | 68.1     | -1.33   | MKX      | 80.1     | -0.65   | MS4A4A   | 86.0     | -0.30   | MTHFD2L  | 91.7     | 0.03    |
| SOCS2     | 68.1     | -1.33   | CLEC4D   | 80.6     | -0.62   | CEBPD    | 86.3     | -0.29   | PRIC285  | 91.7     | 0.03    |
| HSH2D     | 68.4     | -1.32   | STAT1    | 80.6     | -0.62   | FBXO6    | 86.3     | -0.29   | PDK1     | 92.0     | 0.04    |
| C5orf39   | 68.4     | -1.32   | COMMD3   | 80.6     | -0.62   | GTPBP2   | 86.8     | -0.26   | HLA-F    | 92.2     | 0.06    |
| GALNT2    | 68.4     | -1.32   | TAGAP    | 80.8     | -0.60   | CD74     | 86.8     | -0.26   | TMEM51   | 92.2     | 0.06    |
| THOC4     | 68.7     | -1.30   | SERPINB9 | 81.1     | -0.59   | SLC25A30 | 86.8     | -0.26   | IGFBP2   | 92.5     | 0.07    |
| SLC25A28  | 68.7     | -1.30   | C1S      | 81.3     | -0.57   | IFI27    | 87.3     | -0.23   | FLJ39739 | 92.5     | 0.07    |
| ARG2      | 68.9     | -1.29   | GK       | 81.6     | -0.56   | TNFAIP6  | 87.3     | -0.23   | MAFF     | 92.5     | 0.07    |
| PMAIP1    | 69.2     | -1.27   | BCL2L14  | 81.6     | -0.56   | NMI      | 87.3     | -0.23   | ATP10D   | 92.5     | 0.07    |
| CXCL9     | 69.2     | -1.27   | OPTN     | 81.6     | -0.56   | PHF11    | 87.3     | -0.23   | CD80     | 92.5     | 0.07    |
| IL1RN     | 70.7     | -1.18   | ADFP     | 81.9     | -0.54   | MT1H     | 87.6     | -0.21   | PADI2    | 92.7     | 0.09    |
| ISG20     | 71.5     | -1.14   | STAP1    | 81.9     | -0.54   | ISG15    | 87.6     | -0.21   | TRIM38   | 92.7     | 0.09    |
| P2RY6     | 71.8     | -1.12   | MT1F     | 82.1     | -0.53   | GCA      | 87.8     | -0.20   | ARHGEF3  | 92.7     | 0.09    |
| TBX3      | 72.0     | -1.11   | G6PC     | 82.1     | -0.53   | WARS     | 87.8     | -0.20   | PI4K2B   | 93.0     | 0.10    |
| SAMD4A    | 72.3     | -1.09   | ZNF313   | 82.4     | -0.51   | CD69     | 87.8     | -0.20   | ABLIM3   | 93.0     | 0.10    |
| CXCL10    | 72.5     | -1.08   | MT1G     | 82.6     | -0.50   | FAM70A   | 88.1     | -0.18   | JAK2     | 93.0     | 0.10    |
| FLJ23556  | 72.8     | -1.06   | BATF2    | 82.6     | -0.50   | TAP1     | 88.1     | -0.18   | LIPA     | 93.3     | 0.12    |
| MAB21L2   | 72.8     | -1.06   | GPX2     | 82.6     | -0.50   | PFKFB3   | 88.3     | -0.17   | LAP3     | 93.3     | 0.12    |
| C10orf10  | 72.8     | -1.06   | CCNA1    | 82.6     | -0.50   | HK2      | 88.3     | -0.17   | GJA4     | 93.3     | 0.12    |
| EPST11    | 72.8     | -1.06   | PSMB8    | 82.6     | -0.50   | SPTLC2   | 88.3     | -0.17   | MAX      | 93.5     | 0.13    |
| MYD88     | 73.1     | -1.05   | AKT3     | 82.6     | -0.50   | SSBP3    | 88.6     | -0.15   | ALDH1A1  | 93.5     | 0.13    |
| TIMP1     | 73.3     | -1.03   | LINCR    | 82.9     | -0.48   | DUSP5    | 88.6     | -0.15   | TRIM5    | 93.5     | 0.13    |
| C2orf31   | 73.3     | -1.03   | LGMN     | 82.9     | -0.48   | APOL2    | 88.9     | -0.14   | CCND3    | 93.8     | 0.15    |
| ADM       | 73.6     | -1.02   | BLVRA    | 83.2     | -0.47   | CDKN1A   | 89.1     | -0.12   | ULK4     | 93.8     | 0.15    |
| MARCKS    | 73.6     | -1.02   | GLRX     | 83.2     | -0.47   | CES1     | 89.4     | -0.11   | OGFR     | 94.0     | 0.16    |
| LGALS3    | 74.4     | -0.97   | ZNF385B  | 83.4     | -0.45   | IFIT1    | 89.4     | -0.11   | IL6ST    | 94.3     | 0.18    |
| EHD4      | 74.6     | -0.96   | NCF1     | 83.4     | -0.45   | IL1R     | 89.4     | -0.11   | TNFAIP3  | 94.6     | 0.19    |
| HES4      | 74.9     | -0.94   | MT1X     | 83.4     | -0.45   | C15orf48 | 89.6     | -0.09   | TLR3     | 94.6     | 0.19    |
| C5orf27   | 75.4     | -0.91   | MAFB     | 83.4     | -0.45   | PTMA     | 89.6     | -0.09   | S100A8   | 94.8     | 0.21    |
| PPM1K     | 75.4     | -0.91   | CCL4     | 83.7     | -0.44   | NT5C3    | 89.6     | -0.09   | CCDC75   | 94.8     | 0.21    |
| BCL3      | 75.4     | -0.91   | FUT4     | 83.7     | -0.44   | EIF3L    | 89.6     | -0.09   | CSDA     | 94.8     | 0.21    |
| SLFN5     | 75.6     | -0.90   | CXCL11   | 83.7     | -0.44   | GEM      | 89.6     | -0.09   | APOL6    | 95.1     | 0.22    |
| DEFB1     | 75.9     | -0.88   | PIM3     | 83.9     | -0.42   | UNC84B   | 89.9     | -0.08   | LGALS9   | 95.6     | 0.25    |

Supplementary Table 5. Large scale ISG screen: YFV in *STAT1*<sup>-/-</sup> fibroblasts at 24 h (page 2 of 2)

| Gene     | Percent  |         | Gene     | Percent  |         | Gene     | Percent  |         | Gene | Percent  |         |
|----------|----------|---------|----------|----------|---------|----------|----------|---------|------|----------|---------|
|          | Infected | Z score |          | Infected | Z score |          | Infected | Z score |      | Infected | Z score |
| CMAH     | 95.6     | 0.25    | ENPP1    | 101.8    | 0.61    | RAB27A   | 110.6    | 1.12    |      |          |         |
| NPAS2    | 95.6     | 0.25    | HERC6    | 101.8    | 0.61    | STEAP4   | 110.9    | 1.13    |      |          |         |
| AGPAT9   | 95.9     | 0.27    | AHNAK2   | 101.8    | 0.61    | ATF3     | 110.9    | 1.13    |      |          |         |
| TRAFD1   | 95.9     | 0.27    | C9orf19  | 101.8    | 0.61    | SLC16A1  | 110.9    | 1.13    |      |          |         |
| HLA-C    | 96.1     | 0.28    | SAT3     | 102.1    | 0.63    | CD163    | 111.4    | 1.16    |      |          |         |
| SERPING1 | 96.1     | 0.28    | ANGPTL1  | 102.1    | 0.63    | SOCS1    | 111.7    | 1.18    |      |          |         |
| CX3CL1   | 96.1     | 0.28    | KIAA0040 | 102.1    | 0.63    | KIAA0082 | 111.7    | 1.18    |      |          |         |
| SAA1     | 96.4     | 0.30    | IRF9     | 102.6    | 0.66    | RIPK2    | 111.9    | 1.19    |      |          |         |
| RBCK1    | 96.4     | 0.30    | KIAA1618 | 102.6    | 0.66    | IFI44L   | 111.9    | 1.19    |      |          |         |
| NCOA3    | 96.4     | 0.30    | IFNGR1   | 102.6    | 0.66    | TCF7L2   | 112.7    | 1.24    |      |          |         |
| VEGFC    | 96.6     | 0.31    | TRIM34   | 102.6    | 0.66    | SIRPA    | 113.0    | 1.25    |      |          |         |
| HEG1     | 96.6     | 0.31    | PMM2     | 103.4    | 0.70    | OAS2     | 113.5    | 1.28    |      |          |         |
| ACSL1    | 96.6     | 0.31    | MCL1     | 103.4    | 0.70    | CTCFL    | 114.0    | 1.31    |      |          |         |
| PSCD1    | 97.2     | 0.34    | PLEKHA4  | 103.6    | 0.72    | NUP50    | 114.2    | 1.33    |      |          |         |
| OASL     | 97.4     | 0.36    | NOD2     | 103.6    | 0.72    | PNPT1    | 114.2    | 1.33    |      |          |         |
| TRIM21   | 97.4     | 0.36    | IFI44    | 103.6    | 0.72    | TDRD7    | 114.2    | 1.33    |      |          |         |
| JUNB     | 97.7     | 0.37    | IFIT3    | 103.6    | 0.72    | DTX3L    | 114.8    | 1.36    |      |          |         |
| RARRES3  | 97.7     | 0.37    | RPL22    | 103.6    | 0.72    | CRY1     | 115.0    | 1.37    |      |          |         |
| USP18    | 97.9     | 0.39    | SCARB2   | 103.9    | 0.73    | MX2      | 115.0    | 1.37    |      |          |         |
| STAT2    | 97.9     | 0.39    | LEPR     | 103.9    | 0.73    | AXUD1    | 115.5    | 1.40    |      |          |         |
| SECTM1   | 98.2     | 0.40    | DDIT4    | 104.1    | 0.75    | TAP2     | 116.1    | 1.43    |      |          |         |
| CLEC4E   | 98.2     | 0.40    | FAM46A   | 104.1    | 0.75    | AQP9     | 116.6    | 1.46    |      |          |         |
| IL15     | 98.2     | 0.40    | TRIM14   | 104.7    | 0.78    | CFB      | 116.6    | 1.46    |      |          |         |
| CPT1A    | 98.4     | 0.42    | CD274    | 104.7    | 0.78    | BUB1     | 116.6    | 1.46    |      |          |         |
| GBP5     | 98.4     | 0.42    | HESX1    | 104.9    | 0.79    | IFI16    | 116.8    | 1.48    |      |          |         |
| XAF1     | 98.4     | 0.42    | DNATP6   | 104.9    | 0.79    | FAM46C   | 117.1    | 1.49    |      |          |         |
| EPAS1    | 98.4     | 0.42    | ODC1     | 104.9    | 0.79    | ARNTL    | 117.6    | 1.52    |      |          |         |
| MAP3K14  | 98.4     | 0.42    | PML      | 105.2    | 0.81    | PARP12   | 119.9    | 1.66    |      |          |         |
| C9orf91  | 98.7     | 0.43    | UNC93B1  | 105.7    | 0.84    | APOL1    | 121.0    | 1.72    |      |          |         |
| PCTK2    | 99.0     | 0.45    | MX1      | 106.0    | 0.85    | MAP3K5   | 124.4    | 1.91    |      |          |         |
| IL15RA   | 99.0     | 0.45    | MASTL    | 106.0    | 0.85    | SP110    | 126.9    | 2.06    |      |          |         |
| NAPA     | 99.2     | 0.46    | SERPINE1 | 106.2    | 0.87    | DDX3X    | 127.7    | 2.11    |      |          |         |
| IFITM1   | 99.2     | 0.46    | DHX58    | 106.2    | 0.87    | RNF19B   | 128.8    | 2.17    |      |          |         |
| PUS1     | 99.5     | 0.48    | ADAMDEC1 | 106.2    | 0.87    | FNDC3B   | 132.9    | 2.41    |      |          |         |
| ERLIN1   | 99.5     | 0.48    | EXT1     | 106.5    | 0.88    | MCOLN2   | 137.8    | 2.69    |      |          |         |
| SLC15A3  | 99.7     | 0.49    | SCO2     | 106.7    | 0.90    | LY6E     | 179.8    | 5.11    |      |          |         |
| Gluc     | 100.0    | 0.51    | SNN      | 107.0    | 0.91    |          |          |         |      |          |         |
| CCR1     | 100.0    | 0.51    | IDO1     | 107.0    | 0.91    |          |          |         |      |          |         |
| NDC80    | 100.3    | 0.52    | PNRC1    | 107.5    | 0.94    |          |          |         |      |          |         |
| WHDC1    | 100.3    | 0.52    | PDGFRL   | 107.5    | 0.94    |          |          |         |      |          |         |
| RNASE4   | 100.5    | 0.54    | ABTB2    | 107.5    | 0.94    |          |          |         |      |          |         |
| SPSB1    | 100.8    | 0.55    | DCP1A    | 108.0    | 0.97    |          |          |         |      |          |         |
| BTN3A3   | 100.8    | 0.55    | FCGR1A   | 108.3    | 0.99    |          |          |         |      |          |         |
| MSR1     | 101.0    | 0.57    | CASP7    | 108.8    | 1.01    |          |          |         |      |          |         |
| GMPR     | 101.3    | 0.58    | CD38     | 109.1    | 1.03    |          |          |         |      |          |         |
| GBP4     | 101.3    | 0.58    | IFI35    | 109.3    | 1.04    |          |          |         |      |          |         |
| VAMP5    | 101.6    | 0.60    | AMPH     | 109.8    | 1.07    |          |          |         |      |          |         |
| B4GALT5  | 101.6    | 0.60    | SAMHD1   | 110.1    | 1.09    |          |          |         |      |          |         |
| FFAR2    | 101.6    | 0.60    | IL17RB   | 110.4    | 1.10    |          |          |         |      |          |         |
| GBP2     | 101.8    | 0.61    | ANKFY1   | 110.4    | 1.10    |          |          |         |      |          |         |
| PHF15    | 101.8    | 0.61    | GAK      | 110.6    | 1.12    |          |          |         |      |          |         |

Supplementary Table 6. Large scale ISG screen: YFV in Huh-7 cells at 24 h (page 1 of 2)

| Gene     | Percent  |         |
|----------|----------|---------|----------|----------|---------|----------|----------|---------|----------|----------|---------|
|          | Infected | Z score |
| HPSE     | 42.5     | -5.08   | FNDC4    | 85.1     | 0.30    | CCL8     | 90.7     | 1.01    | GBP4     | 94.6     | 1.50    |
| IRF1     | 55.7     | -3.41   | CCND3    | 85.3     | 0.33    | STAP1    | 90.8     | 1.03    | RNASE4   | 94.7     | 1.52    |
| IRF2     | 62.3     | -2.57   | TIMP1    | 85.3     | 0.33    | FAM70A   | 90.9     | 1.04    | CRP      | 94.8     | 1.53    |
| IFITM3   | 65.7     | -2.15   | FCGR1A   | 85.4     | 0.34    | NUP50    | 90.9     | 1.04    | GALNT2   | 94.9     | 1.55    |
| ETV6     | 67.3     | -1.95   | ZNF385B  | 85.4     | 0.34    | C4orf33  | 91.0     | 1.05    | CRY1     | 95.1     | 1.56    |
| TRIM14   | 74.2     | -1.08   | MAP3K14  | 85.6     | 0.37    | EHD4     | 91.2     | 1.07    | NRN1     | 95.3     | 1.59    |
| IRF7     | 74.3     | -1.06   | PRIC285  | 85.8     | 0.39    | AKT3     | 91.2     | 1.07    | RTP4     | 95.4     | 1.61    |
| IFITM3   | 76.1     | -0.83   | PFKFB3   | 85.8     | 0.39    | GPX2     | 91.7     | 1.14    | UNC84B   | 95.5     | 1.62    |
| NT5C3    | 76.3     | -0.80   | IL17RB   | 86.0     | 0.42    | ISG15    | 91.8     | 1.16    | HLA-C    | 95.5     | 1.62    |
| IFI6     | 76.7     | -0.76   | ANGPTL1  | 86.0     | 0.42    | MCL1     | 91.8     | 1.16    | HLA-F    | 95.5     | 1.62    |
| PI4K2B   | 76.8     | -0.74   | CCL2     | 86.2     | 0.45    | ERLIN1   | 92.0     | 1.17    | PNPT1    | 95.5     | 1.62    |
| PBEF1    | 76.8     | -0.74   | PCTK2    | 86.5     | 0.47    | RASSF4   | 92.0     | 1.17    | LINCR    | 95.6     | 1.63    |
| C2orf31  | 77.2     | -0.70   | SIRPA    | 86.6     | 0.49    | GZMB     | 92.0     | 1.17    | SLC15A3  | 95.6     | 1.63    |
| C5orf39  | 77.5     | -0.66   | THOC4    | 86.6     | 0.49    | MAX      | 92.0     | 1.17    | GCA      | 95.6     | 1.63    |
| MYD88    | 78.2     | -0.57   | BATF2    | 86.9     | 0.53    | IFI6     | 92.0     | 1.17    | CD69     | 95.8     | 1.65    |
| ADFP     | 79.0     | -0.47   | LGMM     | 86.9     | 0.53    | PADI2    | 92.1     | 1.18    | GEM      | 95.8     | 1.65    |
| SSBP3    | 79.0     | -0.47   | FAM46C   | 86.9     | 0.53    | BCL2L14  | 92.1     | 1.18    | FBXO6    | 95.9     | 1.66    |
| C22orf28 | 80.1     | -0.32   | JUNB     | 87.0     | 0.55    | CXCL11   | 92.2     | 1.20    | PHF15    | 95.9     | 1.66    |
| LAP3     | 80.1     | -0.32   | TREX1    | 87.1     | 0.56    | HSH2D    | 92.2     | 1.20    | TAP1     | 96.0     | 1.68    |
| ZBP1     | 80.4     | -0.29   | PSCD1    | 87.7     | 0.63    | PPM1K    | 92.2     | 1.20    | RARRES3  | 96.1     | 1.69    |
| GK       | 80.5     | -0.28   | NCF1     | 87.8     | 0.65    | PMAIP1   | 92.3     | 1.21    | RNF19B   | 96.1     | 1.69    |
| MT1F     | 80.9     | -0.22   | SERPING1 | 87.9     | 0.66    | OASL     | 92.4     | 1.23    | TMEM51   | 96.1     | 1.69    |
| CCNA1    | 81.2     | -0.19   | LGALS3   | 87.9     | 0.66    | UPP2     | 92.5     | 1.24    | SPTLC2   | 96.1     | 1.69    |
| CYP1B1   | 81.6     | -0.14   | NDC80    | 88.1     | 0.68    | CLEC2B   | 92.7     | 1.26    | COMMD3   | 96.1     | 1.69    |
| ADM      | 81.6     | -0.14   | LAMP3    | 88.2     | 0.69    | CES1     | 92.7     | 1.26    | PTMA     | 96.3     | 1.72    |
| GTPBP2   | 81.6     | -0.14   | SERPINB9 | 88.2     | 0.69    | GTPBP1   | 92.7     | 1.26    | CCL5     | 96.3     | 1.72    |
| ALDH1A1  | 82.0     | -0.09   | GBP2     | 88.3     | 0.71    | CXCL10   | 92.9     | 1.29    | CCDC92   | 96.3     | 1.72    |
| FLJ23556 | 82.5     | -0.02   | PPM1K    | 88.3     | 0.71    | OAS2     | 92.9     | 1.29    | IFIT2    | 96.4     | 1.74    |
| PUS1     | 82.7     | 0.00    | DEFB1    | 88.4     | 0.72    | LIPA     | 92.9     | 1.29    | TNFAIP6  | 96.4     | 1.74    |
| FUT4     | 82.8     | 0.01    | G6PC     | 88.6     | 0.75    | CCL19    | 93.0     | 1.30    | IL15     | 96.4     | 1.74    |
| C5orf27  | 82.9     | 0.02    | PXK      | 88.7     | 0.76    | SCARB2   | 93.1     | 1.32    | APOBEC3A | 96.4     | 1.74    |
| PDK1     | 82.9     | 0.02    | IL28RA   | 89.0     | 0.79    | BTN3A3   | 93.2     | 1.33    | SLFN5    | 96.6     | 1.75    |
| IFITM2   | 83.1     | 0.05    | MT1G     | 89.0     | 0.79    | UBE2L6   | 93.3     | 1.34    | SECTM1   | 96.7     | 1.77    |
| IFNGR1   | 83.4     | 0.08    | IFI30    | 89.4     | 0.85    | SLC25A30 | 93.3     | 1.34    | ADAMDEC1 | 96.7     | 1.77    |
| IFIT5    | 83.4     | 0.08    | HLA-E    | 89.4     | 0.85    | B2M      | 93.3     | 1.34    | OPTN     | 96.7     | 1.77    |
| LRG1     | 83.4     | 0.08    | ETV7     | 89.6     | 0.87    | C10orf10 | 93.3     | 1.34    | PRKD2    | 96.8     | 1.78    |
| MTHFD2L  | 83.5     | 0.10    | NFIL3    | 89.6     | 0.87    | CLEC4E   | 93.7     | 1.39    | CD274    | 96.9     | 1.79    |
| DDX58    | 83.7     | 0.13    | APOL2    | 89.6     | 0.87    | SAA1     | 93.7     | 1.39    | Fluc     | 97.0     | 1.81    |
| CEBPD    | 83.8     | 0.14    | EIF3L    | 89.6     | 0.87    | GCH1     | 93.7     | 1.39    | RIPK2    | 97.0     | 1.81    |
| SLC1A1   | 83.9     | 0.16    | TNFSF10  | 89.6     | 0.87    | SOCS2    | 93.7     | 1.39    | IFI27    | 97.2     | 1.84    |
| TYMP     | 84.0     | 0.17    | NAPA     | 89.9     | 0.91    | CASP7    | 93.7     | 1.39    | CCL4     | 97.4     | 1.85    |
| CCDC109B | 84.2     | 0.18    | DDIT4    | 89.9     | 0.91    | KIAA1618 | 93.9     | 1.42    | CXCL9    | 97.5     | 1.87    |
| MT1M     | 84.5     | 0.23    | STAT1    | 89.9     | 0.91    | C1S      | 93.9     | 1.42    | CPT1A    | 97.6     | 1.88    |
| SMAD3    | 84.6     | 0.24    | NOD2     | 89.9     | 0.91    | BAG1     | 94.0     | 1.43    | NPAS2    | 97.6     | 1.88    |
| IDO1     | 84.7     | 0.26    | HK2      | 89.9     | 0.91    | DCP1A    | 94.0     | 1.43    | DUSP5    | 97.7     | 1.90    |
| IL1RN    | 84.7     | 0.26    | PRAME    | 90.0     | 0.92    | VAMP5    | 94.1     | 1.45    | AMPH     | 97.8     | 1.91    |
| ARG2     | 84.7     | 0.26    | S100A8   | 90.0     | 0.92    | TAP2     | 94.3     | 1.46    | CD9      | 97.8     | 1.91    |
| MT1H     | 84.8     | 0.27    | IFI44L   | 90.1     | 0.94    | IRF9     | 94.5     | 1.49    | C4orf32  | 97.8     | 1.91    |
| MAB21L2  | 85.0     | 0.29    | NMI      | 90.2     | 0.95    | TNFSF13B | 94.5     | 1.49    | DDX3X    | 97.8     | 1.91    |
| SLC25A28 | 85.0     | 0.29    | DYNLT1   | 90.4     | 0.97    | SNN      | 94.5     | 1.49    | MASTL    | 97.9     | 1.92    |
| BLVRA    | 85.1     | 0.30    | MKX      | 90.7     | 1.01    | STAT2    | 94.6     | 1.50    | FAM134B  | 98.0     | 1.94    |



Supplementary Table 6. Large scale ISG screen: YFV in Huh-7 cells at 24 h (page 2 of 2)

| Gene     | Percent  |         | Gene     | Percent  |         | Gene    | Percent  |         | Gene   | Percent  |         |
|----------|----------|---------|----------|----------|---------|---------|----------|---------|--------|----------|---------|
|          | Infected | Z score |          | Infected | Z score |         | Infected | Z score |        | Infected | Z score |
| FAM125B  | 98.2     | 1.95    | LMO2     | 100.7    | 2.27    | HLA-G   | 103.8    | 2.66    | TXNIP  | 110.1    | 3.46    |
| ABTB2    | 98.2     | 1.95    | GLRX     | 100.7    | 2.27    | IL15RA  | 103.8    | 2.66    | STARD5 | 110.2    | 3.48    |
| SAT3     | 98.3     | 1.97    | EPAS1    | 100.8    | 2.29    | PARP12  | 103.8    | 2.66    | TRIM21 | 111.1    | 3.59    |
| GBP5     | 98.3     | 1.97    | TCF7L2   | 100.8    | 2.29    | MX2     | 103.8    | 2.66    |        |          |         |
| ULK4     | 98.4     | 1.98    | C6orf150 | 100.9    | 2.30    | ANKFY1  | 103.9    | 2.68    |        |          |         |
| GAK      | 98.5     | 2.00    | CMAH     | 100.9    | 2.30    | CDKN1A  | 104.0    | 2.69    |        |          |         |
| VEGFC    | 98.5     | 2.00    | MAFB     | 101.0    | 2.32    | ATF3    | 104.1    | 2.71    |        |          |         |
| EPSTI1   | 98.5     | 2.00    | ODC1     | 101.0    | 2.32    | ELF1    | 104.1    | 2.71    |        |          |         |
| TRAFD1   | 98.5     | 2.00    | DHX58    | 101.1    | 2.33    | IGFBP2  | 104.2    | 2.72    |        |          |         |
| CLEC4D   | 98.6     | 2.01    | CREB3L3  | 101.1    | 2.33    | TFEC    | 104.4    | 2.74    |        |          |         |
| C15orf48 | 98.6     | 2.01    | MS4A4A   | 101.1    | 2.33    | PML     | 104.5    | 2.75    |        |          |         |
| WHDC1    | 98.6     | 2.01    | PHF11    | 101.4    | 2.36    | FAM46A  | 104.6    | 2.77    |        |          |         |
| GBP1     | 98.6     | 2.01    | ZNF313   | 101.4    | 2.36    | NCOA3   | 104.6    | 2.77    |        |          |         |
| DTX3L    | 98.6     | 2.01    | MCOLN2   | 101.6    | 2.39    | IFIT1   | 104.7    | 2.78    |        |          |         |
| FER1L3   | 98.6     | 2.01    | IL1R     | 101.7    | 2.40    | BUB1    | 104.7    | 2.78    |        |          |         |
| SAMHD1   | 98.7     | 2.03    | KIAA0082 | 101.7    | 2.40    | TLR3    | 104.8    | 2.80    |        |          |         |
| SOCS1    | 98.7     | 2.03    | PSMB9    | 101.8    | 2.42    | CX3CL1  | 104.9    | 2.81    |        |          |         |
| MT1X     | 98.9     | 2.04    | CCR1     | 101.8    | 2.42    | RPL22   | 104.9    | 2.81    |        |          |         |
| CTCFL    | 98.9     | 2.04    | MAP3K5   | 101.8    | 2.42    | MARCKS  | 105.1    | 2.82    |        |          |         |
| KIAA0040 | 98.9     | 2.04    | PLSCR1   | 101.8    | 2.42    | TLR7    | 105.1    | 2.82    |        |          |         |
| IL6ST    | 98.9     | 2.04    | FNDC3B   | 101.8    | 2.42    | BCL3    | 105.2    | 2.84    |        |          |         |
| CFB      | 98.9     | 2.04    | RBCK1    | 102.0    | 2.43    | ABLIM3  | 105.2    | 2.84    |        |          |         |
| TAGAP    | 98.9     | 2.04    | TMEM49   | 102.1    | 2.45    | C9orf19 | 105.2    | 2.84    |        |          |         |
| AIM2     | 99.0     | 2.06    | ENPP1    | 102.1    | 2.45    | PNRC1   | 105.4    | 2.87    |        |          |         |
| HES4     | 99.1     | 2.07    | CD80     | 102.1    | 2.45    | IFIT3   | 105.5    | 2.88    |        |          |         |
| THBD     | 99.1     | 2.07    | MAFF     | 102.2    | 2.46    | IMPA2   | 105.9    | 2.93    |        |          |         |
| RGS1     | 99.1     | 2.07    | SP110    | 102.3    | 2.48    | ISG20   | 106.0    | 2.94    |        |          |         |
| ANKRD22  | 99.1     | 2.07    | AXUD1    | 102.3    | 2.48    | LY6E    | 106.1    | 2.95    |        |          |         |
| PMM2     | 99.2     | 2.08    | LGALS9   | 102.4    | 2.49    | IFI35   | 106.2    | 2.97    |        |          |         |
| PLEKHA4  | 99.2     | 2.08    | SERPINE1 | 102.5    | 2.51    | TNFAIP3 | 106.2    | 2.97    |        |          |         |
| CSDA     | 99.3     | 2.10    | USP18    | 102.5    | 2.51    | IFITM1  | 106.2    | 2.97    |        |          |         |
| HEG1     | 99.3     | 2.10    | SAMD4A   | 102.6    | 2.52    | TRIM38  | 106.3    | 2.98    |        |          |         |
| PSMB8    | 99.4     | 2.11    | AGPAT9   | 102.6    | 2.52    | STEAP4  | 106.4    | 3.00    |        |          |         |
| MX1      | 99.5     | 2.13    | WARS     | 102.8    | 2.53    | TRIM5   | 106.5    | 3.01    |        |          |         |
| ARHGEF3  | 99.7     | 2.14    | C9orf91  | 102.8    | 2.53    | XAF1    | 106.7    | 3.03    |        |          |         |
| APOL6    | 99.7     | 2.14    | AHNAK2   | 102.8    | 2.53    | ADAR    | 106.7    | 3.03    |        |          |         |
| AQP9     | 99.8     | 2.16    | CD163    | 102.8    | 2.53    | CD38    | 106.8    | 3.04    |        |          |         |
| ARNTL    | 99.8     | 2.16    | EXT1     | 102.9    | 2.55    | TBX3    | 107.0    | 3.07    |        |          |         |
| FLJ39739 | 99.9     | 2.17    | TRIM34   | 102.9    | 2.55    | MICB    | 107.1    | 3.09    |        |          |         |
| SCO2     | 99.9     | 2.17    | RSAD2    | 103.1    | 2.58    | FKBP5   | 107.2    | 3.10    |        |          |         |
| Gluc     | 100.0    | 2.19    | SLC16A1  | 103.1    | 2.58    | GMPR    | 107.5    | 3.13    |        |          |         |
| IFI16    | 100.0    | 2.19    | LEPR     | 103.1    | 2.58    | PIM3    | 107.6    | 3.14    |        |          |         |
| HERC6    | 100.1    | 2.20    | MX1      | 103.1    | 2.58    | APOL1   | 107.8    | 3.17    |        |          |         |
| JAK2     | 100.1    | 2.20    | GBP3     | 103.2    | 2.59    | SPSB1   | 108.6    | 3.27    |        |          |         |
| GJA4     | 100.2    | 2.21    | RNF24    | 103.2    | 2.59    | DNAPTP6 | 108.7    | 3.29    |        |          |         |
| TDRD7    | 100.2    | 2.21    | DDX60    | 103.2    | 2.59    | B4GALT5 | 108.8    | 3.30    |        |          |         |
| ACSL1    | 100.3    | 2.23    | TRIM25   | 103.3    | 2.61    | FFAR2   | 108.8    | 3.30    |        |          |         |
| HESX1    | 100.5    | 2.24    | CCDC75   | 103.4    | 2.62    | PDGFRL  | 109.5    | 3.39    |        |          |         |
| TMEM140  | 100.6    | 2.26    | CHMP5    | 103.4    | 2.62    | P2RY6   | 109.5    | 3.39    |        |          |         |
| CD74     | 100.7    | 2.27    | UNC93B1  | 103.6    | 2.64    | RAB27A  | 109.9    | 3.43    |        |          |         |
| ATP10D   | 100.7    | 2.27    | OGFR     | 103.7    | 2.65    | IFI44   | 110.0    | 3.45    |        |          |         |

Supplementary Table 7. Large scale ISG screen: HIV in T cells at 48 h (page 1 of 2)

| Gene      | Percent  |         | Gene     | Percent  |         | Gene     | Percent  |         | Gene     | Percent  |         |
|-----------|----------|---------|----------|----------|---------|----------|----------|---------|----------|----------|---------|
|           | Infected | Z score |          | Infected | Z score |          | Infected | Z score |          | Infected | Z score |
| TNFRSF10A | 20.5     | -5.01   | PMAIP1   | 91.8     | -0.64   | MKX      | 96.7     | -0.34   | GBP1     | 101.2    | -0.07   |
| IFITM3    | 21.5     | -4.94   | IFI27    | 92.0     | -0.63   | GCA      | 96.9     | -0.33   | PLEKHA4  | 101.4    | -0.05   |
| IRF1      | 45.3     | -3.49   | STEAP4   | 92.0     | -0.63   | GBP2     | 97.2     | -0.31   | PPM1K    | 101.4    | -0.05   |
| CD74      | 46.5     | -3.41   | CCDC75   | 92.3     | -0.61   | MT1F     | 97.2     | -0.31   | LMO2     | 101.4    | -0.05   |
| IFITM2    | 49.5     | -3.23   | THBD     | 92.3     | -0.61   | MT1M     | 97.4     | -0.30   | AMPH     | 101.6    | -0.04   |
| BCL3      | 49.8     | -3.21   | GTPBP1   | 92.3     | -0.61   | HLA-F    | 97.4     | -0.30   | AIM2     | 101.6    | -0.04   |
| MX2       | 64.3     | -2.32   | C9orf91  | 92.3     | -0.61   | EPSTI1   | 97.4     | -0.30   | CCDC92   | 101.6    | -0.04   |
| UNC84B    | 66.7     | -2.18   | HESX1    | 92.3     | -0.61   | PSMB8    | 97.7     | -0.28   | C22orf28 | 101.9    | -0.02   |
| MICB      | 68.3     | -2.08   | VEGFC    | 92.5     | -0.60   | FLJ23556 | 97.7     | -0.28   | HEG1     | 101.9    | -0.02   |
| ATF3      | 69.0     | -2.04   | CXCL9    | 93.0     | -0.57   | FAM70A   | 97.7     | -0.28   | IMPA2    | 101.9    | -0.02   |
| IRF7      | 70.4     | -1.95   | C4orf33  | 93.0     | -0.57   | SPSB1    | 97.9     | -0.27   | ULK4     | 101.9    | -0.02   |
| NFIL3     | 75.6     | -1.63   | PI4K2B   | 93.2     | -0.56   | TRIM21   | 97.9     | -0.27   | TFEC     | 102.1    | -0.01   |
| STARD5    | 77.5     | -1.52   | BTN3A3   | 93.2     | -0.56   | STAT1    | 97.9     | -0.27   | TAGAP    | 102.3    | 0.00    |
| IRF2      | 78.6     | -1.45   | UNC93B1  | 93.2     | -0.56   | PFKFB3   | 98.1     | -0.25   | ANKRD22  | 102.3    | 0.00    |
| SNN       | 79.3     | -1.40   | CDKN1A   | 93.4     | -0.54   | TMEM49   | 98.1     | -0.25   | MS4A4A   | 102.3    | 0.00    |
| TREX1     | 81.5     | -1.27   | NRN1     | 93.7     | -0.53   | NMI      | 98.1     | -0.25   | ARHGEF3  | 102.6    | 0.02    |
| MCOLN2    | 82.4     | -1.22   | PRAME    | 93.9     | -0.51   | PSCD1    | 98.1     | -0.25   | IRF9     | 102.6    | 0.02    |
| CREB3L3   | 82.9     | -1.19   | HSH2D    | 93.9     | -0.51   | GBP4     | 98.4     | -0.24   | SLC16A1  | 102.6    | 0.02    |
| TRIM14    | 83.1     | -1.17   | MAFF     | 94.1     | -0.50   | OASL     | 98.6     | -0.23   | CLEC4D   | 102.6    | 0.02    |
| CD274     | 84.0     | -1.12   | MT1H     | 94.4     | -0.48   | RNF19B   | 98.6     | -0.23   | TNFAIP6  | 102.6    | 0.02    |
| TRIM5     | 84.3     | -1.10   | JUNB     | 94.6     | -0.47   | LRG1     | 98.6     | -0.23   | SERPINE1 | 102.8    | 0.03    |
| CLEC4E    | 84.3     | -1.10   | SLC15A3  | 94.8     | -0.46   | PDK1     | 98.8     | -0.21   | GJA4     | 102.8    | 0.03    |
| SECTM1    | 84.5     | -1.09   | SLC1A1   | 95.1     | -0.44   | IGFBP2   | 98.8     | -0.21   | MAB21L2  | 102.8    | 0.03    |
| IDO1      | 84.7     | -1.07   | DHX58    | 95.1     | -0.44   | TAP2     | 98.8     | -0.21   | NT5C3    | 103.1    | 0.05    |
| SQLE      | 85.2     | -1.04   | CMAH     | 95.1     | -0.44   | MT1G     | 98.8     | -0.21   | NCF1     | 103.1    | 0.05    |
| SOCS2     | 85.7     | -1.02   | FLJ39739 | 95.1     | -0.44   | PTMA     | 98.8     | -0.21   | IL28RA   | 103.1    | 0.05    |
| SCARB2    | 87.3     | -0.91   | PNRC1    | 95.1     | -0.44   | ISG20    | 99.1     | -0.20   | STAT3    | 103.3    | 0.06    |
| CD69      | 87.8     | -0.89   | IFIT3    | 95.3     | -0.43   | SERPINB9 | 99.1     | -0.20   | XAF1     | 103.3    | 0.06    |
| TMEM51    | 87.8     | -0.89   | RASSF4   | 95.3     | -0.43   | FNDC4    | 99.1     | -0.20   | MX1      | 103.3    | 0.06    |
| GEM       | 88.3     | -0.86   | C5orf27  | 95.3     | -0.43   | RASGEF1B | 99.3     | -0.18   | PRIC285  | 103.3    | 0.06    |
| AKT3      | 88.5     | -0.84   | PBEF1    | 95.5     | -0.41   | PML      | 99.8     | -0.15   | IFI30    | 103.8    | 0.09    |
| AQP9      | 88.7     | -0.83   | C15orf48 | 95.5     | -0.41   | TAP1     | 99.8     | -0.15   | RBCK1    | 103.8    | 0.09    |
| TYMP      | 89.0     | -0.81   | GMPR     | 95.5     | -0.41   | NOD2     | 99.8     | -0.15   | DYNLT1   | 104.0    | 0.11    |
| HK2       | 89.0     | -0.81   | CCND3    | 95.5     | -0.41   | PLSCR1   | 99.8     | -0.15   | CCL5     | 104.0    | 0.11    |
| GAK       | 89.2     | -0.80   | BATF2    | 95.5     | -0.41   | IFNGR1   | 100.0    | -0.14   | TRIM38   | 104.0    | 0.11    |
| FAM125B   | 89.4     | -0.79   | TNFSF13B | 95.5     | -0.41   | PCTK2    | 100.0    | -0.14   | CRY1     | 104.0    | 0.11    |
| CD9       | 89.7     | -0.77   | DEFB1    | 95.8     | -0.40   | PXK      | 100.0    | -0.14   | TIMP1    | 104.0    | 0.11    |
| PMM2      | 89.9     | -0.76   | SERPING1 | 96.0     | -0.38   | Fluc     | 100.0    | -0.14   | CFB      | 104.2    | 0.12    |
| SSBP3     | 89.9     | -0.76   | RPL22    | 96.0     | -0.38   | IFI35    | 100.0    | -0.14   | LIPA     | 104.2    | 0.12    |
| SAMD4A    | 89.9     | -0.76   | IFIT2    | 96.0     | -0.38   | KIAA1618 | 100.0    | -0.14   | STAT2    | 104.2    | 0.12    |
| WHDC1     | 90.1     | -0.74   | GZMB     | 96.0     | -0.38   | SMAD3    | 100.2    | -0.12   | ABTB2    | 104.5    | 0.13    |
| NUP50     | 90.4     | -0.73   | GK       | 96.2     | -0.37   | UBE2L6   | 100.5    | -0.11   | IFIT1    | 104.5    | 0.13    |
| IFI44     | 90.4     | -0.73   | EIF3L    | 96.2     | -0.37   | USP18    | 100.5    | -0.11   | EXT1     | 104.7    | 0.15    |
| RGS1      | 90.6     | -0.71   | GTPBP2   | 96.5     | -0.35   | THOC4    | 100.5    | -0.11   | KIAA0040 | 104.7    | 0.15    |
| RAB27A    | 91.1     | -0.68   | MTHFD2L  | 96.5     | -0.35   | MCL1     | 100.7    | -0.10   | C10orf10 | 104.7    | 0.15    |
| GCH1      | 91.1     | -0.68   | IFIT5    | 96.7     | -0.34   | COMMD3   | 100.7    | -0.10   | APOL2    | 104.7    | 0.15    |
| ADFP      | 91.3     | -0.67   | ARNTL    | 96.7     | -0.34   | PNPT1    | 100.9    | -0.08   | P2RY6    | 104.9    | 0.16    |
| CASP7     | 91.3     | -0.67   | HES4     | 96.7     | -0.34   | BLVRA    | 100.9    | -0.08   | TNFAIP3  | 104.9    | 0.16    |
| ALDH1A1   | 91.5     | -0.66   | ZNF313   | 96.7     | -0.34   | CEBPD    | 100.9    | -0.08   | CCL4     | 105.2    | 0.18    |
| LGALS9    | 91.5     | -0.66   | UPP2     | 96.7     | -0.34   | FBXO6    | 100.9    | -0.08   | AGPAT9   | 105.2    | 0.18    |
| NAPA      | 91.5     | -0.66   | BCL2L14  | 96.7     | -0.34   | ADM      | 101.2    | -0.07   | TBX3     | 105.2    | 0.18    |

Supplementary Table 7. Large scale ISG screen: HIV in T cells at 48 h (page 2 of 2)

| Gene     | Percent  |         | Gene     | Percent  |         | Gene    | Percent  |         | Gene | Percent  |         |
|----------|----------|---------|----------|----------|---------|---------|----------|---------|------|----------|---------|
|          | Infected | Z score |          | Infected | Z score |         | Infected | Z score |      | Infected | Z score |
| CHMP5    | 105.4    | 0.19    | S100A8   | 111.3    | 0.55    | DDX3X   | 122.5    | 1.24    |      |          |         |
| DUSP5    | 105.4    | 0.19    | PPM1K    | 111.3    | 0.55    | SLFN5   | 122.8    | 1.25    |      |          |         |
| ABLIM3   | 105.4    | 0.19    | ANGPTL1  | 111.5    | 0.56    | WARS    | 123.0    | 1.27    |      |          |         |
| PUS1     | 105.6    | 0.21    | TRIM34   | 111.5    | 0.56    | AHNAK2  | 123.7    | 1.31    |      |          |         |
| FCGR1A   | 105.6    | 0.21    | SAA1     | 111.7    | 0.58    | EPAS1   | 124.2    | 1.34    |      |          |         |
| HPSE     | 105.9    | 0.22    | LAP3     | 112.0    | 0.59    | PABPC4  | 126.1    | 1.46    |      |          |         |
| GBP5     | 105.9    | 0.22    | RSAD2    | 112.0    | 0.59    | CCR1    | 126.3    | 1.47    |      |          |         |
| MYD88    | 105.9    | 0.22    | TRAFD1   | 112.4    | 0.62    | TRIM25  | 127.2    | 1.53    |      |          |         |
| ZNF385B  | 105.9    | 0.22    | G6PC     | 112.4    | 0.62    | CSDA    | 128.2    | 1.58    |      |          |         |
| HLA-C    | 105.9    | 0.22    | ARG2     | 112.7    | 0.64    | IL1R    | 131.0    | 1.76    |      |          |         |
| CRP      | 105.9    | 0.22    | MAP3K5   | 112.9    | 0.65    | IL6ST   | 132.4    | 1.84    |      |          |         |
| IL17RB   | 106.1    | 0.23    | OPTN     | 112.9    | 0.65    | ETV6    | 132.6    | 1.86    |      |          |         |
| PIM3     | 106.1    | 0.23    | SLC25A30 | 113.1    | 0.67    | ATP10D  | 132.6    | 1.86    |      |          |         |
| STAP1    | 106.1    | 0.23    | BST2     | 113.1    | 0.67    | GALNT2  | 132.9    | 1.87    |      |          |         |
| ADAMDEC1 | 106.1    | 0.23    | APOL1    | 113.4    | 0.68    | TMEM140 | 133.1    | 1.89    |      |          |         |
| AXUD1    | 106.3    | 0.25    | ZBP1     | 113.6    | 0.69    | ELF1    | 133.6    | 1.92    |      |          |         |
| DDIT4    | 106.6    | 0.26    | RNASE4   | 113.6    | 0.69    | MAFB    | 133.8    | 1.93    |      |          |         |
| ENPP1    | 106.8    | 0.28    | SAMHD1   | 113.8    | 0.71    | MASTL   | 135.4    | 2.03    |      |          |         |
| HLA-G    | 106.8    | 0.28    | LAMP3    | 114.1    | 0.72    | MSR1    | 135.7    | 2.04    |      |          |         |
| RARRES3  | 106.8    | 0.28    | OAS1     | 114.3    | 0.74    | IFI16   | 137.3    | 2.15    |      |          |         |
| MARCKS   | 106.8    | 0.28    | FUT4     | 114.3    | 0.74    | DNAPT6  | 139.2    | 2.26    |      |          |         |
| TNFSF10  | 106.8    | 0.28    | CYP1B1   | 115.0    | 0.78    | TLR3    | 144.6    | 2.59    |      |          |         |
| MAX      | 107.0    | 0.29    | KIAA0082 | 115.0    | 0.78    | CD163   | 148.6    | 2.83    |      |          |         |
| BAG1     | 107.3    | 0.31    | SOCS1    | 115.3    | 0.79    | LEPR    | 156.3    | 3.31    |      |          |         |
| C4orf32  | 107.5    | 0.32    | NDC80    | 115.5    | 0.81    | ADAR    | 162.9    | 3.71    |      |          |         |
| C9orf19  | 107.5    | 0.32    | DTX3L    | 115.5    | 0.81    |         |          |         |      |          |         |
| CCDC109B | 107.5    | 0.32    | FAM134B  | 115.5    | 0.81    |         |          |         |      |          |         |
| PDGFRL   | 107.7    | 0.34    | C1S      | 115.5    | 0.81    |         |          |         |      |          |         |
| IFI6     | 108.5    | 0.38    | GBP3     | 115.5    | 0.81    |         |          |         |      |          |         |
| ERLIN1   | 108.7    | 0.39    | B4GALT5  | 115.7    | 0.82    |         |          |         |      |          |         |
| SIRPA    | 108.9    | 0.41    | C2orf31  | 116.0    | 0.84    |         |          |         |      |          |         |
| MT1X     | 109.2    | 0.42    | IL15RA   | 116.0    | 0.84    |         |          |         |      |          |         |
| RNF24    | 109.2    | 0.42    | PADI2    | 116.2    | 0.85    |         |          |         |      |          |         |
| CD38     | 109.4    | 0.44    | HLA-E    | 116.4    | 0.87    |         |          |         |      |          |         |
| FKBP5    | 109.4    | 0.44    | SP110    | 117.1    | 0.91    |         |          |         |      |          |         |
| IL15     | 109.4    | 0.44    | GPX2     | 117.4    | 0.92    |         |          |         |      |          |         |
| LGALS3   | 109.4    | 0.44    | EHD4     | 117.6    | 0.94    |         |          |         |      |          |         |
| IL1RN    | 109.6    | 0.45    | PHF15    | 117.8    | 0.95    |         |          |         |      |          |         |
| CCNA1    | 109.6    | 0.45    | HERC6    | 118.1    | 0.97    |         |          |         |      |          |         |
| CX3CL1   | 109.6    | 0.45    | NPAS2    | 118.5    | 1.00    |         |          |         |      |          |         |
| OGFR     | 109.6    | 0.45    | PSMB9    | 119.0    | 1.02    |         |          |         |      |          |         |
| CD80     | 109.6    | 0.45    | CPT1A    | 119.0    | 1.02    |         |          |         |      |          |         |
| LINCRC   | 109.9    | 0.46    | ISG15    | 119.2    | 1.04    |         |          |         |      |          |         |
| SLC25A28 | 109.9    | 0.46    | ETV7     | 119.2    | 1.04    |         |          |         |      |          |         |
| PHF11    | 109.9    | 0.46    | LY6E     | 119.7    | 1.07    |         |          |         |      |          |         |
| C6orf150 | 110.1    | 0.48    | TXNIP    | 120.7    | 1.13    |         |          |         |      |          |         |
| CTCF     | 110.3    | 0.49    | OAS2     | 120.9    | 1.14    |         |          |         |      |          |         |
| RTP4     | 110.3    | 0.49    | PARP12   | 121.6    | 1.18    |         |          |         |      |          |         |
| LGMN     | 110.6    | 0.51    | ANKFY1   | 121.6    | 1.18    |         |          |         |      |          |         |
| PRKD2    | 110.6    | 0.51    | FAM46A   | 121.8    | 1.20    |         |          |         |      |          |         |
| CLEC2B   | 110.8    | 0.52    | RIPK2    | 122.1    | 1.21    |         |          |         |      |          |         |

Supplementary Table 8. Large scale ISG screen: WNV in STAT1<sup>-/-</sup> fibroblasts at 6 h (page 1 of 2)

| Gene      | Percent  |         | Gene     | Percent  |         | Gene     | Percent  |         | Gene     | Percent  |         |
|-----------|----------|---------|----------|----------|---------|----------|----------|---------|----------|----------|---------|
|           | Infected | Z score |          | Infected | Z score |          | Infected | Z score |          | Infected | Z score |
| IRF1      | 15.1     | -4.60   | FBXO6    | 80.2     | -0.95   | IL17RB   | 88.5     | -0.49   | TRIM25   | 93.9     | -0.19   |
| HPSE      | 20.3     | -4.31   | ATF3     | 80.2     | -0.95   | STEAP4   | 88.5     | -0.49   | TREX1    | 94.3     | -0.17   |
| UNC93B1   | 30.0     | -3.76   | IFNGR1   | 80.2     | -0.95   | CCL19    | 88.8     | -0.48   | TRIM38   | 94.3     | -0.17   |
| C6orf150  | 30.4     | -3.74   | IFI27    | 80.9     | -0.92   | MICB     | 88.8     | -0.48   | ACSL1    | 94.3     | -0.17   |
| DDX58     | 41.1     | -3.14   | TRIM14   | 80.9     | -0.92   | B2M      | 89.1     | -0.46   | CXCL9    | 94.6     | -0.15   |
| IFIH1     | 49.0     | -2.70   | IFITM2   | 81.6     | -0.88   | FAM70A   | 89.1     | -0.46   | GTPBP1   | 94.6     | -0.15   |
| IRF7      | 53.5     | -2.45   | CCDC75   | 81.6     | -0.88   | RPL22    | 89.1     | -0.46   | GCA      | 94.6     | -0.15   |
| PBEF1     | 58.3     | -2.18   | LRG1     | 81.9     | -0.86   | GBP4     | 89.1     | -0.46   | GBP5     | 94.6     | -0.15   |
| BCL2L14   | 59.0     | -2.14   | TNFAIP6  | 81.9     | -0.86   | RNF24    | 89.1     | -0.46   | IFI6     | 95.0     | -0.13   |
| PHF15     | 60.7     | -2.05   | THBD     | 81.9     | -0.86   | HK2      | 89.5     | -0.44   | FCGR1A   | 95.0     | -0.13   |
| SAA1      | 61.7     | -1.99   | IMPA2    | 82.3     | -0.84   | DCP1A    | 89.5     | -0.44   | TCF7L2   | 95.0     | -0.13   |
| GJA4      | 63.8     | -1.88   | TRAFD1   | 82.3     | -0.84   | MKX      | 89.8     | -0.42   | GZMB     | 95.3     | -0.11   |
| C5orf39   | 64.1     | -1.86   | IFI44    | 82.6     | -0.82   | MCOLN2   | 90.2     | -0.40   | ANGPTL1  | 95.3     | -0.11   |
| TNFSF13B  | 65.8     | -1.76   | CHMP5    | 82.6     | -0.82   | PCTK2    | 90.2     | -0.40   | CXCL10   | 95.7     | -0.09   |
| CCL8      | 67.2     | -1.68   | TFEC     | 82.6     | -0.82   | XAF1     | 90.2     | -0.40   | WARS     | 95.7     | -0.09   |
| PLSCR1    | 67.2     | -1.68   | USP18    | 83.0     | -0.80   | CCL5     | 90.5     | -0.38   | PNPT1    | 95.7     | -0.09   |
| CXCL11    | 67.9     | -1.65   | NUP50    | 83.0     | -0.80   | TNFSF10  | 90.5     | -0.38   | SPTLC2   | 96.0     | -0.07   |
| P2RY6     | 68.2     | -1.63   | CD274    | 83.3     | -0.78   | ELF1     | 90.5     | -0.38   | OPTN     | 96.0     | -0.07   |
| IFI16     | 68.2     | -1.63   | NAPA     | 83.7     | -0.76   | NRN1     | 90.9     | -0.36   | SERPINE1 | 96.7     | -0.03   |
| C15orf48  | 69.3     | -1.57   | EPST11   | 83.7     | -0.76   | UPP2     | 90.9     | -0.36   | COMMD3   | 96.7     | -0.03   |
| CD9       | 70.3     | -1.51   | PML      | 84.3     | -0.72   | IFI44L   | 90.9     | -0.36   | IFIT2    | 96.7     | -0.03   |
| MCL1      | 70.6     | -1.49   | EPAS1    | 84.3     | -0.72   | DDX3X    | 90.9     | -0.36   | Fluc     | 97.0     | -0.01   |
| PMAIP1    | 71.0     | -1.47   | LGALS9   | 84.7     | -0.71   | PUS1     | 91.2     | -0.34   | ARNTL    | 97.0     | -0.01   |
| EHD4      | 71.0     | -1.47   | CPT1A    | 84.7     | -0.71   | FAM125B  | 91.2     | -0.34   | IFI35    | 97.4     | 0.00    |
| ABTB2     | 72.0     | -1.41   | PDGFRL   | 84.7     | -0.71   | FUT4     | 91.5     | -0.32   | MTHFD2L  | 97.4     | 0.00    |
| IFITM3    | 72.3     | -1.40   | GEM      | 85.0     | -0.69   | DEFB1    | 91.5     | -0.32   | MX1      | 97.4     | 0.00    |
| SAMD4A    | 73.0     | -1.36   | KIAA0082 | 85.0     | -0.69   | CCDC109B | 91.5     | -0.32   | FFAR2    | 97.4     | 0.00    |
| MAP3K14   | 73.4     | -1.34   | GPX2     | 85.4     | -0.67   | PNRC1    | 91.5     | -0.32   | MS4A4A   | 97.7     | 0.02    |
| IFIT3     | 73.7     | -1.32   | CCL4     | 85.7     | -0.65   | ALDH1A1  | 91.5     | -0.32   | C10orf10 | 98.4     | 0.06    |
| SLC15A3   | 74.1     | -1.30   | SIRPA    | 85.7     | -0.65   | CSDA     | 91.5     | -0.32   | ADFP     | 98.4     | 0.06    |
| STARD5    | 74.1     | -1.30   | SLFN5    | 85.7     | -0.65   | ISG20    | 91.5     | -0.32   | CLEC2B   | 98.4     | 0.06    |
| RARRES3   | 74.7     | -1.26   | DTX3L    | 85.7     | -0.65   | BUB1     | 91.5     | -0.32   | BTN3A3   | 98.4     | 0.06    |
| IFITM3    | 75.4     | -1.22   | CRP      | 86.1     | -0.63   | PSMB8    | 91.9     | -0.30   | Fluc     | 98.4     | 0.06    |
| TNFRSF10A | 75.8     | -1.20   | THOC4    | 86.1     | -0.63   | TBX3     | 91.9     | -0.30   | PFKFB3   | 98.7     | 0.08    |
| SCARB2    | 76.1     | -1.18   | EXT1     | 86.1     | -0.63   | TLR3     | 91.9     | -0.30   | NOD2     | 98.7     | 0.08    |
| NDC80     | 76.8     | -1.15   | LAMP3    | 86.1     | -0.63   | AQP9     | 92.2     | -0.28   | GBP3     | 98.7     | 0.08    |
| BLVRA     | 77.1     | -1.13   | PSCD1    | 86.1     | -0.63   | GBP1     | 92.2     | -0.28   | MARCKS   | 98.7     | 0.08    |
| OASL      | 77.5     | -1.11   | GALNT2   | 86.4     | -0.61   | NFIL3    | 92.2     | -0.28   | TMEM51   | 99.1     | 0.10    |
| BCL3      | 77.8     | -1.09   | RSAD2    | 86.7     | -0.59   | JUNB     | 92.9     | -0.24   | CES1     | 99.1     | 0.10    |
| TMEM49    | 77.8     | -1.09   | SLC25A28 | 86.7     | -0.59   | SECTM1   | 92.9     | -0.24   | IFIT5    | 99.4     | 0.12    |
| KIAA1618  | 77.8     | -1.09   | TDRD7    | 86.7     | -0.59   | SERPING1 | 92.9     | -0.24   | ZBP1     | 99.4     | 0.12    |
| TAP1      | 78.2     | -1.07   | CTCFL    | 87.1     | -0.57   | MT1X     | 93.3     | -0.23   | ANKRD22  | 99.4     | 0.12    |
| AMPH      | 78.2     | -1.07   | MSR1     | 87.1     | -0.57   | BATF2    | 93.3     | -0.23   | TRIM5    | 99.4     | 0.12    |
| ETV7      | 78.5     | -1.05   | PSMB9    | 87.4     | -0.55   | PRIC285  | 93.6     | -0.21   | STAT2    | 99.4     | 0.12    |
| AGPAT9    | 78.5     | -1.05   | AIM2     | 87.4     | -0.55   | DYNLT1   | 93.6     | -0.21   | MX2      | 99.4     | 0.12    |
| CLEC4E    | 78.9     | -1.03   | RNASE4   | 87.8     | -0.53   | DHX58    | 93.6     | -0.21   | LIPA     | 99.8     | 0.14    |
| CMAH      | 79.2     | -1.01   | MYD88    | 88.1     | -0.51   | TNFAIP3  | 93.6     | -0.21   | PI4K2B   | 99.8     | 0.14    |
| MAFB      | 79.2     | -1.01   | RTP4     | 88.1     | -0.51   | PHF11    | 93.6     | -0.21   | PTMA     | 99.8     | 0.14    |
| IFIT1     | 79.2     | -1.01   | SOCS2    | 88.5     | -0.49   | ARHGEF3  | 93.6     | -0.21   | C4orf33  | 100.1    | 0.16    |
| LGALS3    | 79.5     | -0.99   | HLA-G    | 88.5     | -0.49   | ARG2     | 93.9     | -0.19   | HSH2D    | 100.1    | 0.16    |
| APOL1     | 79.5     | -0.99   | SSBP3    | 88.5     | -0.49   | OGFR     | 93.9     | -0.19   | APOL2    | 100.1    | 0.16    |

Supplementary Table 8. Large scale ISG screen: WNV in STAT1<sup>hi</sup> fibroblasts at 6 h (page 2 of 2)

| Gene     | Percent Infected | Z score | Gene     | Percent Infected | Z score | Gene    | Percent Infected | Z score | Gene     | Percent Infected | Z score |
|----------|------------------|---------|----------|------------------|---------|---------|------------------|---------|----------|------------------|---------|
| FAM134B  | 100.1            | 0.16    | AXUD1    | 105.6            | 0.46    | WHDC1   | 113.5            | 0.91    | PXK      | 125.5            | 1.58    |
| GTPBP2   | 100.5            | 0.18    | ADAR     | 105.6            | 0.46    | ZNF385B | 113.8            | 0.93    | PPM1K    | 125.5            | 1.58    |
| C2orf31  | 100.5            | 0.18    | PRAME    | 105.9            | 0.48    | GAK     | 113.8            | 0.93    | SAMHD1   | 125.5            | 1.58    |
| RAB27A   | 100.5            | 0.18    | VAMP5    | 106.3            | 0.50    | TRIM34  | 113.8            | 0.93    | PCTK3    | 125.8            | 1.60    |
| SPSB1    | 100.8            | 0.20    | IGFBP2   | 106.3            | 0.50    | AHNAK2  | 113.8            | 0.93    | ERLIN1   | 127.2            | 1.67    |
| TAP2     | 100.8            | 0.20    | HLA-C    | 106.3            | 0.50    | C9orf19 | 113.8            | 0.93    | TYMP     | 127.9            | 1.71    |
| IFITM1   | 100.8            | 0.20    | TXNIP    | 106.3            | 0.50    | LAP3    | 114.2            | 0.94    | MT1M     | 128.6            | 1.75    |
| CYP1B1   | 101.1            | 0.22    | FLJ39739 | 106.6            | 0.52    | CD74    | 114.2            | 0.94    | FNDC3B   | 128.9            | 1.77    |
| GLRX     | 101.1            | 0.22    | CDKN1A   | 107.0            | 0.54    | RASSF4  | 114.2            | 0.94    | ODC1     | 129.6            | 1.81    |
| HEG1     | 101.1            | 0.22    | G6PC     | 107.0            | 0.54    | MT1G    | 114.5            | 0.96    | FLT1     | 129.6            | 1.81    |
| NMI      | 101.5            | 0.23    | ZAP      | 107.0            | 0.54    | MT1H    | 114.5            | 0.96    | TIMP1    | 131.3            | 1.90    |
| CX3CL1   | 101.5            | 0.23    | NCF1     | 107.3            | 0.56    | CREB3L3 | 114.5            | 0.96    | MAP3K5   | 138.2            | 2.29    |
| PLEKHA4  | 101.8            | 0.25    | RNF19B   | 107.3            | 0.56    | RBCK1   | 114.9            | 0.98    | TAGAP    | 139.5            | 2.36    |
| GCH1     | 101.8            | 0.25    | ULK4     | 107.3            | 0.56    | CCNA1   | 114.9            | 0.98    | APOBEC3A | 143.3            | 2.57    |
| CCDC92   | 101.8            | 0.25    | MX1      | 107.7            | 0.58    | IL15RA  | 114.9            | 0.98    | IDO1     | 144.7            | 2.65    |
| ATP10D   | 101.8            | 0.25    | C22orf28 | 108.0            | 0.60    | HESX1   | 115.2            | 1.00    |          |                  |         |
| CFB      | 102.2            | 0.27    | FKBP5    | 108.0            | 0.60    | FER1L3  | 115.2            | 1.00    |          |                  |         |
| OAS2     | 102.2            | 0.27    | ABLIM3   | 108.0            | 0.60    | MASTL   | 115.5            | 1.02    |          |                  |         |
| IRF2     | 102.2            | 0.27    | PDK1     | 108.3            | 0.62    | NPAS2   | 115.9            | 1.04    |          |                  |         |
| UNC84B   | 102.5            | 0.29    | ENPP1    | 108.3            | 0.62    | B4GALT5 | 115.9            | 1.04    |          |                  |         |
| HERC6    | 102.5            | 0.29    | CCR1     | 108.3            | 0.62    | ZNF313  | 116.2            | 1.06    |          |                  |         |
| IL6ST    | 102.5            | 0.29    | SAT3     | 108.7            | 0.64    | LEPR    | 116.2            | 1.06    |          |                  |         |
| APOL6    | 102.5            | 0.29    | S100A8   | 109.0            | 0.66    | NCOA3   | 116.2            | 1.06    |          |                  |         |
| Gluc     | 102.9            | 0.31    | PPM1K    | 109.0            | 0.66    | GBP2    | 116.6            | 1.08    |          |                  |         |
| CLEC4D   | 102.9            | 0.31    | CCL2     | 109.4            | 0.68    | FAM46C  | 116.6            | 1.08    |          |                  |         |
| DNAPTP6  | 102.9            | 0.31    | NOS2A    | 109.4            | 0.68    | NT5C3   | 117.3            | 1.12    |          |                  |         |
| ETV6     | 103.2            | 0.33    | LGMN     | 109.7            | 0.69    | AKT3    | 117.3            | 1.12    |          |                  |         |
| RGS1     | 103.2            | 0.33    | GMPR     | 109.7            | 0.69    | MAX     | 117.9            | 1.16    |          |                  |         |
| SNN      | 103.5            | 0.35    | PMM2     | 110.1            | 0.71    | SCO2    | 117.9            | 1.16    |          |                  |         |
| JAK2     | 103.5            | 0.35    | SLC1A1   | 110.1            | 0.71    | TLK2    | 118.3            | 1.17    |          |                  |         |
| CASP7    | 103.5            | 0.35    | PRKD2    | 110.4            | 0.73    | ANKFY1  | 118.6            | 1.19    |          |                  |         |
| HES4     | 103.9            | 0.37    | LY6E     | 110.4            | 0.73    | BST2    | 118.6            | 1.19    |          |                  |         |
| SERPINB9 | 103.9            | 0.37    | SLC16A1  | 110.4            | 0.73    | MT1F    | 119.3            | 1.23    |          |                  |         |
| SLC25A30 | 103.9            | 0.37    | C1S      | 110.7            | 0.75    | HLA-F   | 119.7            | 1.25    |          |                  |         |
| PARP12   | 103.9            | 0.37    | TRIM21   | 111.1            | 0.77    | IL15    | 119.7            | 1.25    |          |                  |         |
| CD38     | 103.9            | 0.37    | HLA-E    | 111.4            | 0.79    | CD69    | 120.0            | 1.27    |          |                  |         |
| PADI2    | 104.2            | 0.39    | LMO2     | 111.4            | 0.79    | BAG1    | 120.7            | 1.31    |          |                  |         |
| EIF3L    | 104.2            | 0.39    | PIM3     | 111.4            | 0.79    | FAM46A  | 121.7            | 1.37    |          |                  |         |
| UBE2L6   | 104.6            | 0.41    | GK       | 111.4            | 0.79    | STAT1   | 122.1            | 1.39    |          |                  |         |
| Fluc     | 104.6            | 0.41    | OAS1     | 111.4            | 0.79    | SMAD3   | 122.7            | 1.42    |          |                  |         |
| STAP1    | 104.6            | 0.41    | ISG15    | 111.8            | 0.81    | MAFF    | 123.1            | 1.44    |          |                  |         |
| IL1R     | 104.6            | 0.41    | KIAA0040 | 111.8            | 0.81    | RIPK2   | 123.1            | 1.44    |          |                  |         |
| RBM25    | 104.6            | 0.41    | C9orf91  | 111.8            | 0.81    | DDX60   | 123.4            | 1.46    |          |                  |         |
| LINCR    | 104.9            | 0.43    | SP110    | 112.1            | 0.83    | CEBPD   | 123.8            | 1.48    |          |                  |         |
| MAB21L2  | 104.9            | 0.43    | CD80     | 112.1            | 0.83    | C5orf27 | 123.8            | 1.48    |          |                  |         |
| CRY1     | 104.9            | 0.43    | TMEM140  | 112.1            | 0.83    | CCND3   | 124.1            | 1.50    |          |                  |         |
| VEGFC    | 105.3            | 0.45    | ADM      | 112.5            | 0.85    | IL1RN   | 124.1            | 1.50    |          |                  |         |
| C4orf32  | 105.3            | 0.45    | IL28RA   | 112.8            | 0.87    | DDIT4   | 124.1            | 1.50    |          |                  |         |
| IFI6     | 105.6            | 0.46    | CD163    | 113.1            | 0.89    | IRF9    | 124.1            | 1.50    |          |                  |         |
| SOCS1    | 105.6            | 0.46    | FLJ23556 | 113.5            | 0.91    | DUSP5   | 124.5            | 1.52    |          |                  |         |
| ADAMDEC1 | 105.6            | 0.46    | FNDC4    | 113.5            | 0.91    | IFI30   | 125.1            | 1.56    |          |                  |         |

Supplementary Table 9. Large scale ISG screen: VEEV in STAT1<sup>-/-</sup> fibroblasts at 5.5 h (page 1 of 2)

| Gene     | Percent  |         |
|----------|----------|---------|----------|----------|---------|----------|----------|---------|----------|----------|---------|
|          | Infected | Z score |
| IRF1     | 10.0     | -4.23   | MAFB     | 69.1     | -0.99   | OAS2     | 75.3     | -0.64   | CHMP5    | 82.4     | -0.26   |
| UNC93B1  | 18.9     | -3.74   | SLFN5    | 69.4     | -0.97   | CCL19    | 75.6     | -0.63   | CASP7    | 83.0     | -0.23   |
| C6orf150 | 31.8     | -3.03   | PCTK2    | 69.4     | -0.97   | NUP50    | 75.9     | -0.61   | FAM70A   | 83.2     | -0.21   |
| DDX58    | 32.1     | -3.02   | IFI44    | 69.6     | -0.96   | ANGPTL1  | 75.9     | -0.61   | IL17RB   | 83.2     | -0.21   |
| HPSE     | 37.8     | -2.70   | ADAMDEC1 | 69.6     | -0.96   | APOL6    | 75.9     | -0.61   | GTPBP2   | 83.5     | -0.20   |
| PBEF1    | 43.5     | -2.39   | MAP3K14  | 69.6     | -0.96   | TFEC     | 76.2     | -0.60   | TRIM5    | 83.5     | -0.20   |
| IFIH1    | 51.1     | -1.97   | TMEM51   | 69.9     | -0.94   | CLEC4D   | 76.7     | -0.57   | TCF7L2   | 83.5     | -0.20   |
| PHF15    | 51.4     | -1.96   | FNDC4    | 70.2     | -0.93   | MT1H     | 77.0     | -0.56   | CCL2     | 84.0     | -0.17   |
| IRF7     | 52.8     | -1.88   | ALDH1A1  | 70.2     | -0.93   | SLC1A1   | 77.0     | -0.56   | TRIM14   | 84.0     | -0.17   |
| IL15RA   | 52.8     | -1.88   | UPP2     | 70.4     | -0.91   | PLSCR1   | 77.2     | -0.54   | PSMB8    | 84.0     | -0.17   |
| SAMD4A   | 54.1     | -1.81   | SNN      | 70.4     | -0.91   | MARCKS   | 77.5     | -0.53   | C15orf48 | 84.9     | -0.12   |
| ABTB2    | 54.1     | -1.81   | XAF1     | 70.4     | -0.91   | MYD88    | 77.8     | -0.51   | CCDC92   | 84.9     | -0.12   |
| P2RY6    | 54.1     | -1.81   | USP18    | 70.7     | -0.90   | NAPA     | 77.8     | -0.51   | PMAIP1   | 85.4     | -0.09   |
| SIRPA    | 54.7     | -1.78   | BLVRA    | 71.0     | -0.88   | TAP1     | 78.3     | -0.48   | LIPA     | 85.7     | -0.08   |
| AQP9     | 54.7     | -1.78   | TDRD7    | 71.0     | -0.88   | STARD5   | 78.3     | -0.48   | MCOLN2   | 85.7     | -0.08   |
| SCARB2   | 57.4     | -1.63   | TNFAIP6  | 71.3     | -0.87   | RPL22    | 78.3     | -0.48   | RGS1     | 85.7     | -0.08   |
| EPSTI1   | 58.5     | -1.57   | TREX1    | 71.3     | -0.87   | IFITM1   | 78.3     | -0.48   | ANKRD22  | 85.9     | -0.06   |
| LGALS9   | 58.7     | -1.55   | CMAH     | 71.5     | -0.85   | PSCD1    | 78.6     | -0.47   | EIF3L    | 86.2     | -0.05   |
| ACSL1    | 58.7     | -1.55   | ABLIM3   | 71.5     | -0.85   | B2M      | 78.9     | -0.45   | NPAS2    | 86.2     | -0.05   |
| TLR3     | 59.0     | -1.54   | MSR1     | 71.5     | -0.85   | IGFBP2   | 78.9     | -0.45   | UBE2L6   | 86.5     | -0.03   |
| APOL1    | 59.3     | -1.52   | DEFB1    | 71.8     | -0.84   | SSBP3    | 79.1     | -0.44   | TAP2     | 86.5     | -0.03   |
| IFIT2    | 59.6     | -1.51   | RNASE4   | 71.8     | -0.84   | MAX      | 79.4     | -0.42   | UNC84B   | 87.0     | 0.00    |
| SECTM1   | 60.7     | -1.45   | CXCL10   | 72.3     | -0.81   | FBXO6    | 79.4     | -0.42   | SERPING1 | 87.0     | 0.00    |
| PDGFRL   | 60.7     | -1.45   | EXT1     | 72.3     | -0.81   | CTCFL    | 79.4     | -0.42   | PSMB9    | 87.3     | 0.01    |
| GJA4     | 60.7     | -1.45   | CD274    | 72.3     | -0.81   | NT5C3    | 79.4     | -0.42   | GK       | 87.3     | 0.01    |
| MCL1     | 60.9     | -1.43   | SAT3     | 72.6     | -0.79   | FAM125B  | 79.4     | -0.42   | RSAD2    | 87.3     | 0.01    |
| CFB      | 61.2     | -1.42   | VEGFC    | 72.6     | -0.79   | CD9      | 79.7     | -0.41   | KIAA0082 | 87.3     | 0.01    |
| AIM2     | 61.5     | -1.40   | CLEC2B   | 72.6     | -0.79   | CCL8     | 80.0     | -0.39   | MICB     | 87.3     | 0.01    |
| NRN1     | 61.7     | -1.39   | IFI30    | 72.9     | -0.78   | ATP10D   | 80.0     | -0.39   | HSH2D    | 87.6     | 0.03    |
| IMPA2    | 62.3     | -1.36   | C9orf91  | 72.9     | -0.78   | IFNGR1   | 80.2     | -0.38   | HES4     | 87.9     | 0.04    |
| IFI27    | 62.6     | -1.35   | DTX3L    | 73.2     | -0.76   | TRIM34   | 80.2     | -0.38   | HLA-F    | 87.9     | 0.04    |
| C4orf32  | 62.8     | -1.33   | PTMA     | 73.7     | -0.73   | CXCL11   | 80.5     | -0.36   | CSDA     | 87.9     | 0.04    |
| EPAS1    | 63.6     | -1.29   | SLC15A3  | 73.7     | -0.73   | C10orf10 | 80.5     | -0.36   | TRIM38   | 88.1     | 0.06    |
| EHD4     | 64.2     | -1.26   | SAA1     | 74.0     | -0.72   | WARS     | 80.5     | -0.36   | PHF11    | 88.1     | 0.06    |
| GLRX     | 64.5     | -1.24   | IFI35    | 74.0     | -0.72   | IFIT5    | 80.8     | -0.35   | BST2     | 88.1     | 0.06    |
| ENPP1    | 65.3     | -1.20   | WHDC1    | 74.0     | -0.72   | OGFR     | 80.8     | -0.35   | THOC4    | 88.4     | 0.07    |
| HLA-G    | 65.8     | -1.17   | STEAP4   | 74.0     | -0.72   | C22orf28 | 81.1     | -0.33   | HK2      | 88.7     | 0.09    |
| AMPH     | 65.8     | -1.17   | KIAA1618 | 74.0     | -0.72   | BCL2L14  | 81.1     | -0.33   | C5orf39  | 88.7     | 0.09    |
| RARRES3  | 66.4     | -1.14   | NOD2     | 74.3     | -0.70   | AHNAK2   | 81.1     | -0.33   | CES1     | 88.9     | 0.10    |
| CCL5     | 66.6     | -1.12   | PNRC1    | 74.3     | -0.70   | CXCL9    | 81.3     | -0.32   | PARP12   | 88.9     | 0.10    |
| THBD     | 66.6     | -1.12   | BCL3     | 74.3     | -0.70   | SERPINE1 | 81.3     | -0.32   | TNFAIP3  | 88.9     | 0.10    |
| CCL4     | 66.9     | -1.11   | BAG1     | 74.3     | -0.70   | NDC80    | 81.3     | -0.32   | TRAFD1   | 88.9     | 0.10    |
| SLC16A1  | 66.9     | -1.11   | TBX3     | 74.3     | -0.70   | FNDC3B   | 81.3     | -0.32   | NOS2A    | 88.9     | 0.10    |
| AGPAT9   | 67.2     | -1.09   | TMEM49   | 74.3     | -0.70   | GCH1     | 81.6     | -0.30   | PLEKHA4  | 89.2     | 0.12    |
| IFIT1    | 67.2     | -1.09   | MT1X     | 74.5     | -0.69   | PML      | 81.9     | -0.29   | GBP5     | 89.2     | 0.12    |
| CLEC4E   | 67.5     | -1.08   | NCF1     | 74.5     | -0.69   | OAS1     | 81.9     | -0.29   | MTHFD2L  | 89.5     | 0.13    |
| CX3CL1   | 67.7     | -1.06   | ANKFY1   | 74.5     | -0.69   | BATF2    | 82.1     | -0.27   | GPX2     | 89.5     | 0.13    |
| IFI16    | 68.0     | -1.05   | IFITM3   | 74.8     | -0.67   | PUS1     | 82.1     | -0.27   | TNFSF13B | 89.5     | 0.13    |
| OASL     | 68.5     | -1.02   | PI4K2B   | 74.8     | -0.67   | CD163    | 82.1     | -0.27   | ZNF313   | 89.5     | 0.13    |
| VAMP5    | 68.8     | -1.00   | IFITM3   | 75.3     | -0.64   | CCDC75   | 82.4     | -0.26   | CRP      | 90.0     | 0.16    |
| DHX58    | 68.8     | -1.00   | APOL2    | 75.3     | -0.64   | ODC1     | 82.4     | -0.26   | DDX3X    | 90.0     | 0.16    |

Supplementary Table 9. Large scale ISG screen: VEEV in STAT1<sup>-/-</sup> fibroblasts at 5.5 h (page 2 of 2)

| Gene     | Percent  |         | Gene     | Percent  |         | Gene      | Percent  |         | Gene     | Percent  |         |
|----------|----------|---------|----------|----------|---------|-----------|----------|---------|----------|----------|---------|
|          | Infected | Z score |          | Infected | Z score |           | Infected | Z score |          | Infected | Z score |
| MX2      | 90.0     | 0.16    | RAB27A   | 96.6     | 0.52    | PDK1      | 104.2    | 0.94    | PPM1K    | 116.7    | 1.62    |
| RASSF4   | 90.3     | 0.18    | OPTN     | 96.6     | 0.52    | MS4A4A    | 104.2    | 0.94    | ERLIN1   | 116.7    | 1.62    |
| MKX      | 90.3     | 0.18    | JUNB     | 96.8     | 0.53    | ETV7      | 104.4    | 0.95    | ADM      | 117.2    | 1.65    |
| GEM      | 90.3     | 0.18    | GZMB     | 96.8     | 0.53    | ZBP1      | 104.4    | 0.95    | LEPR     | 118.3    | 1.71    |
| TNFSF10  | 90.6     | 0.19    | IRF2     | 96.8     | 0.53    | DCP1A     | 104.7    | 0.97    | SOCS1    | 118.6    | 1.73    |
| G6PC     | 90.6     | 0.19    | HERC6    | 97.4     | 0.56    | TRIM21    | 104.7    | 0.97    | PPM1K    | 119.1    | 1.76    |
| MASTL    | 90.8     | 0.21    | TAGAP    | 97.4     | 0.56    | RTP4      | 105.0    | 0.98    | TLK2     | 120.2    | 1.82    |
| CCND3    | 91.4     | 0.24    | ULK4     | 97.6     | 0.58    | NCOA3     | 105.8    | 1.03    | TIMP1    | 121.0    | 1.86    |
| SPSB1    | 91.4     | 0.24    | SP110    | 97.9     | 0.59    | TRIM25    | 106.1    | 1.04    | FKBP5    | 121.3    | 1.88    |
| GMPR     | 91.7     | 0.25    | PRKD2    | 97.9     | 0.59    | LINCR     | 106.6    | 1.07    | SMAD3    | 122.7    | 1.95    |
| CD80     | 91.7     | 0.25    | LAMP3    | 97.9     | 0.59    | CCDC109B  | 106.6    | 1.07    | IDO1     | 123.2    | 1.98    |
| SLC25A28 | 91.9     | 0.26    | BUB1     | 97.9     | 0.59    | ATF3      | 106.6    | 1.07    | IL1RN    | 125.4    | 2.10    |
| STAT2    | 91.9     | 0.26    | GCA      | 98.2     | 0.61    | FUT4      | 106.9    | 1.08    | CCNA1    | 125.7    | 2.11    |
| CEBPD    | 92.2     | 0.28    | IL6ST    | 98.2     | 0.61    | IL1R      | 106.9    | 1.08    | DDX60    | 129.5    | 2.32    |
| AKT3     | 92.2     | 0.28    | HESX1    | 98.5     | 0.62    | MT1G      | 107.2    | 1.10    | APOBEC3A | 138.2    | 2.80    |
| AXUD1    | 92.2     | 0.28    | CCR1     | 98.5     | 0.62    | TXNIP     | 107.2    | 1.10    |          |          |         |
| ADFP     | 92.5     | 0.29    | IRF9     | 98.7     | 0.64    | SLC25A30  | 107.4    | 1.11    |          |          |         |
| CPT1A    | 92.5     | 0.29    | DNAPT6   | 98.7     | 0.64    | C2orf31   | 108.0    | 1.14    |          |          |         |
| MX1      | 92.5     | 0.29    | LRG1     | 99.0     | 0.65    | CDKN1A    | 108.0    | 1.14    |          |          |         |
| TMEM140  | 92.5     | 0.29    | BTN3A3   | 99.0     | 0.65    | ARG2      | 108.3    | 1.16    |          |          |         |
| SOCS2    | 92.7     | 0.31    | SPTLC2   | 99.0     | 0.65    | FLT1      | 108.3    | 1.16    |          |          |         |
| Fluc     | 92.7     | 0.31    | FAM134B  | 99.3     | 0.67    | GALNT2    | 108.5    | 1.17    |          |          |         |
| FFAR2    | 92.7     | 0.31    | ARNTL    | 99.5     | 0.68    | HLA-E     | 108.8    | 1.19    |          |          |         |
| IFITM2   | 93.0     | 0.32    | ELF1     | 99.5     | 0.68    | IL15      | 108.8    | 1.19    |          |          |         |
| PMM2     | 93.0     | 0.32    | DDIT4    | 99.8     | 0.70    | ETV6      | 109.1    | 1.20    |          |          |         |
| Fluc     | 93.3     | 0.34    | C1S      | 99.8     | 0.70    | PXK       | 109.1    | 1.20    |          |          |         |
| FCGR1A   | 93.3     | 0.34    | CD74     | 100.1    | 0.71    | ADAR      | 109.1    | 1.20    |          |          |         |
| GBP4     | 93.3     | 0.34    | MT1M     | 100.4    | 0.73    | JAK2      | 109.6    | 1.23    |          |          |         |
| B4GALT5  | 93.3     | 0.34    | C4orf33  | 100.4    | 0.73    | C9orf19   | 109.6    | 1.23    |          |          |         |
| LGALS3   | 93.6     | 0.35    | PIM3     | 100.6    | 0.74    | IFI6      | 109.9    | 1.25    |          |          |         |
| FLJ39739 | 93.6     | 0.35    | GBP2     | 100.6    | 0.74    | SCO2      | 110.7    | 1.29    |          |          |         |
| PRAME    | 93.6     | 0.35    | GAK      | 100.9    | 0.76    | GBP1      | 111.2    | 1.32    |          |          |         |
| ZAP      | 93.6     | 0.35    | Gluc     | 101.2    | 0.77    | SAMHD1    | 111.8    | 1.35    |          |          |         |
| NMI      | 93.8     | 0.37    | CD38     | 101.2    | 0.77    | CREB3L3   | 112.3    | 1.38    |          |          |         |
| PNPT1    | 93.8     | 0.37    | SERPINB9 | 101.5    | 0.79    | MAP3K5    | 113.1    | 1.43    |          |          |         |
| MAB21L2  | 94.1     | 0.38    | CD69     | 101.7    | 0.80    | GBP3      | 113.1    | 1.43    |          |          |         |
| FLJ23556 | 94.1     | 0.38    | DUSP5    | 101.7    | 0.80    | HLA-C     | 113.4    | 1.44    |          |          |         |
| IFI6     | 94.1     | 0.38    | C5orf27  | 102.0    | 0.82    | MAFF      | 113.4    | 1.44    |          |          |         |
| IFI44L   | 94.1     | 0.38    | CRY1     | 102.0    | 0.82    | RIPK2     | 113.7    | 1.46    |          |          |         |
| LAP3     | 94.7     | 0.41    | KIAA0040 | 102.0    | 0.82    | Fluc      | 114.0    | 1.47    |          |          |         |
| ISG20    | 94.7     | 0.41    | PFKFB3   | 102.3    | 0.83    | TNFRSF10A | 114.5    | 1.50    |          |          |         |
| ARHGEF3  | 94.7     | 0.41    | LY6E     | 102.3    | 0.83    | FAM46C    | 114.5    | 1.50    |          |          |         |
| STAP1    | 94.9     | 0.43    | PADI2    | 102.5    | 0.85    | ISG15     | 115.0    | 1.53    |          |          |         |
| IFIT3    | 94.9     | 0.43    | HEG1     | 102.5    | 0.85    | TYMP      | 115.3    | 1.55    |          |          |         |
| LMO2     | 95.5     | 0.46    | MX1      | 102.8    | 0.86    | IL28RA    | 115.6    | 1.56    |          |          |         |
| DYNLT1   | 95.5     | 0.46    | S100A8   | 103.1    | 0.88    | FAM46A    | 115.6    | 1.56    |          |          |         |
| STAT1    | 95.5     | 0.46    | LGMN     | 103.4    | 0.89    | ZNF385B   | 115.9    | 1.58    |          |          |         |
| NFIL3    | 95.5     | 0.46    | RNF19B   | 103.6    | 0.91    | GTPBP1    | 115.9    | 1.58    |          |          |         |
| PRIC285  | 95.7     | 0.47    | RBM25    | 103.6    | 0.91    | CYP1B1    | 116.1    | 1.59    |          |          |         |
| COMMD3   | 96.0     | 0.49    | RNF24    | 103.6    | 0.91    | PCTK3     | 116.1    | 1.59    |          |          |         |
| RBCK1    | 96.6     | 0.52    | FER1L3   | 103.9    | 0.92    | MT1F      | 116.7    | 1.62    |          |          |         |

Supplementary Table 10. Large scale ISG screen: CHIKV in STAT1<sup>-/-</sup> fibroblasts at 10 h (page 1 of 2)

| Percent   |          |         | Percent  |          |         | Percent  |          |         | Percent  |          |         |
|-----------|----------|---------|----------|----------|---------|----------|----------|---------|----------|----------|---------|
| Gene      | Infected | Z score | Gene     | Infected | Z score | Gene     | Infected | Z score | Gene     | Infected | Z score |
| IRF1      | 3.8      | -4.20   | CCL2     | 77.8     | -0.83   | G6PC     | 87.3     | -0.40   | PML      | 94.5     | -0.07   |
| UNC93B1   | 13.6     | -3.75   | BLVRA    | 78.4     | -0.80   | PCTK2    | 87.5     | -0.38   | PRIC285  | 94.8     | -0.05   |
| C6orf150  | 21.5     | -3.40   | SPSB1    | 78.4     | -0.80   | SAA1     | 87.8     | -0.37   | IFI6     | 94.8     | -0.05   |
| SLC25A28  | 28.5     | -3.07   | FLJ39739 | 78.4     | -0.80   | PMM2     | 88.1     | -0.36   | NUP50    | 94.8     | -0.05   |
| SLC15A3   | 28.8     | -3.06   | RSAD2    | 78.4     | -0.80   | DDIT4    | 88.3     | -0.35   | TLR3     | 94.8     | -0.05   |
| P2RY6     | 35.5     | -2.75   | SCO2     | 78.6     | -0.79   | USP18    | 88.3     | -0.35   | TCF7L2   | 95.3     | -0.03   |
| CDKN1A    | 38.2     | -2.63   | STAP1    | 79.7     | -0.74   | CCL5     | 88.3     | -0.35   | FLJ23556 | 95.6     | -0.02   |
| TNFRSF10A | 39.3     | -2.58   | B2M      | 80.0     | -0.73   | ANKRD22  | 88.3     | -0.35   | HEG1     | 95.6     | -0.02   |
| IFIH1     | 43.4     | -2.40   | RAB27A   | 80.0     | -0.73   | IFI6     | 88.6     | -0.34   | UBE2L6   | 95.6     | -0.02   |
| EHD4      | 43.6     | -2.38   | PI4K2B   | 80.3     | -0.72   | RARRES3  | 88.9     | -0.32   | ACSL1    | 95.6     | -0.02   |
| C5orf39   | 49.3     | -2.13   | CD74     | 80.3     | -0.72   | RIPK2    | 89.1     | -0.31   | MAB21L2  | 95.9     | 0.00    |
| IRF2      | 49.6     | -2.11   | C15orf48 | 80.5     | -0.70   | CSDA     | 89.4     | -0.30   | BATF2    | 95.9     | 0.00    |
| IFITM3    | 52.0     | -2.00   | PSMB9    | 80.8     | -0.69   | TAP2     | 89.7     | -0.29   | IFI44    | 96.1     | 0.01    |
| GJA4      | 53.9     | -1.92   | AKT3     | 81.1     | -0.68   | TMEM49   | 89.9     | -0.27   | CASP7    | 96.4     | 0.02    |
| FAM134B   | 55.7     | -1.83   | HLA-G    | 81.1     | -0.68   | KIAA1618 | 89.9     | -0.27   | SLFN5    | 96.4     | 0.02    |
| MAP3K14   | 55.7     | -1.83   | CCL4     | 81.1     | -0.68   | C4orf32  | 89.9     | -0.27   | NAPA     | 96.4     | 0.02    |
| DDX58     | 56.6     | -1.80   | TNFSF10  | 81.3     | -0.67   | RASSF4   | 90.2     | -0.26   | DDX3X    | 96.4     | 0.02    |
| IFITM1    | 56.8     | -1.78   | THOC4    | 81.6     | -0.65   | BAG1     | 90.8     | -0.24   | GMMPR    | 96.7     | 0.03    |
| TRIM14    | 57.4     | -1.76   | HPSE     | 81.6     | -0.65   | GK       | 91.0     | -0.22   | FFAR2    | 96.7     | 0.03    |
| ZBP1      | 58.2     | -1.72   | HES4     | 82.1     | -0.63   | APOL2    | 91.3     | -0.21   | Fluc     | 96.9     | 0.05    |
| IRF7      | 58.2     | -1.72   | TNFAIP6  | 82.1     | -0.63   | C5orf27  | 91.6     | -0.20   | CXCL11   | 96.9     | 0.05    |
| SAMD4A    | 58.2     | -1.72   | GCH1     | 82.1     | -0.63   | GPX2     | 91.6     | -0.20   | PNPT1    | 97.2     | 0.06    |
| STARD5    | 58.7     | -1.70   | RNF19B   | 82.4     | -0.62   | PSMB8    | 91.6     | -0.20   | SNN      | 97.2     | 0.06    |
| NRN1      | 60.6     | -1.61   | VAMP5    | 82.7     | -0.61   | XAF1     | 91.8     | -0.19   | IGFBP2   | 97.5     | 0.07    |
| BCL3      | 62.7     | -1.51   | NCF1     | 82.9     | -0.59   | C10orf10 | 92.1     | -0.18   | TNFSF13B | 97.5     | 0.07    |
| IFIT1     | 62.7     | -1.51   | STEAP4   | 83.2     | -0.58   | ALDH1A1  | 92.1     | -0.18   | IL15RA   | 97.5     | 0.07    |
| MYD88     | 63.3     | -1.49   | PHF15    | 83.2     | -0.58   | CCDC109B | 92.1     | -0.18   | IMPA2    | 97.8     | 0.08    |
| SECTM1    | 63.3     | -1.49   | EPAS1    | 83.2     | -0.58   | GZMB     | 92.1     | -0.18   | CEBPD    | 97.8     | 0.08    |
| IFITM3    | 64.6     | -1.43   | AIM2     | 84.0     | -0.54   | PDGFRL   | 92.1     | -0.18   | TRIM38   | 97.8     | 0.08    |
| IFI27     | 65.7     | -1.38   | SSBP3    | 84.0     | -0.54   | TFEC     | 92.1     | -0.18   | DYNLT1   | 98.0     | 0.09    |
| ARHGEF3   | 66.0     | -1.37   | LGALS9   | 84.0     | -0.54   | CYP1B1   | 92.4     | -0.16   | EIF3L    | 98.0     | 0.09    |
| JUNB      | 66.2     | -1.35   | CX3CL1   | 84.0     | -0.54   | MT1X     | 92.4     | -0.16   | IL1RN    | 98.3     | 0.11    |
| IFITM2    | 67.1     | -1.32   | IFI35    | 84.3     | -0.53   | RPL22    | 92.4     | -0.16   | MKX      | 98.3     | 0.11    |
| PLSCR1    | 67.1     | -1.32   | CXCL9    | 84.3     | -0.53   | MT1F     | 92.6     | -0.15   | CCDC75   | 98.3     | 0.11    |
| EPSTI1    | 67.3     | -1.30   | CCL8     | 84.6     | -0.52   | HS2D     | 92.6     | -0.15   | TRAFD1   | 98.3     | 0.11    |
| CD9       | 68.1     | -1.27   | CCL19    | 84.6     | -0.52   | CXCL10   | 92.6     | -0.15   | PIM3     | 98.6     | 0.12    |
| ATF3      | 68.7     | -1.24   | CCDC92   | 84.8     | -0.51   | ARNTL    | 92.6     | -0.15   | UNC84B   | 98.6     | 0.12    |
| TAP1      | 68.7     | -1.24   | FNDC4    | 85.1     | -0.49   | GBP1     | 92.9     | -0.14   | PDK1     | 98.6     | 0.12    |
| ISG20     | 68.9     | -1.23   | ADFP     | 85.4     | -0.48   | GLRX     | 92.9     | -0.14   | MX1      | 98.6     | 0.12    |
| FAM70A    | 69.5     | -1.21   | DHX58    | 85.4     | -0.48   | CHMP5    | 92.9     | -0.14   | PPM1K    | 98.8     | 0.13    |
| PBEF1     | 69.7     | -1.19   | CMAH     | 85.4     | -0.48   | IFIT3    | 92.9     | -0.14   | LGMN     | 98.8     | 0.13    |
| C9orf91   | 70.0     | -1.18   | CRP      | 85.6     | -0.47   | MTHFD2L  | 93.2     | -0.13   | LINCR    | 99.1     | 0.14    |
| DEFB1     | 70.6     | -1.16   | LGALS3   | 86.2     | -0.45   | LMO2     | 93.2     | -0.13   | IFIT2    | 99.1     | 0.14    |
| BST2      | 71.1     | -1.13   | FBXO6    | 86.4     | -0.43   | ABTB2    | 93.2     | -0.13   | CLEC4E   | 99.1     | 0.14    |
| CES1      | 72.7     | -1.06   | OASL     | 86.4     | -0.43   | HLA-F    | 93.4     | -0.11   | C2orf31  | 99.4     | 0.16    |
| MICB      | 74.3     | -0.99   | ARG2     | 86.7     | -0.42   | TREX1    | 93.4     | -0.11   | Gluc     | 99.4     | 0.16    |
| AGPAT9    | 74.6     | -0.97   | TBX3     | 86.7     | -0.42   | IFI44L   | 93.7     | -0.10   | MSR1     | 99.6     | 0.17    |
| PUS1      | 75.1     | -0.95   | SIRPA    | 87.0     | -0.41   | SCARB2   | 93.7     | -0.10   | COMMD3   | 99.9     | 0.18    |
| SERPINE1  | 76.8     | -0.88   | STAT2    | 87.3     | -0.40   | RNASE4   | 94.0     | -0.09   | MAFB     | 99.9     | 0.18    |
| BCL2L14   | 77.0     | -0.86   | NOD2     | 87.3     | -0.40   | RGS1     | 94.3     | -0.08   | NDC80    | 99.9     | 0.18    |
| MCOLN2    | 77.6     | -0.84   | PMAIP1   | 87.3     | -0.40   | MT1H     | 94.5     | -0.07   | ETV7     | 100.2    | 0.19    |



Supplementary Table 10. Large scale ISG screen: CHIKV in STAT1<sup>-/-</sup> fibroblasts at 10 h (page 2 of 2)

| Gene      | Percent<br>Infected | Z score | Gene     | Percent<br>Infected | Z score | Gene     | Percent<br>Infected | Z score | Gene   | Percent<br>Infected | Z score |
|-----------|---------------------|---------|----------|---------------------|---------|----------|---------------------|---------|--------|---------------------|---------|
| Fluc11/17 | 100.2               | 0.19    | IL28RA   | 106.9               | 0.50    | HERC6    | 114.2               | 0.83    | ODC1   | 133.6               | 1.71    |
| PLEKHA4   | 100.4               | 0.20    | IFI30    | 106.9               | 0.50    | AQP9     | 114.2               | 0.83    | LY6E   | 134.6               | 1.76    |
| ELF1      | 100.4               | 0.20    | LRG1     | 106.9               | 0.50    | SERPING1 | 114.2               | 0.83    | OAS3   | 136.0               | 1.83    |
| TRIM25    | 100.7               | 0.22    | SOCS1    | 106.9               | 0.50    | MX2      | 114.2               | 0.83    | FAM46A | 137.1               | 1.87    |
| MCL1      | 100.7               | 0.22    | IL17RB   | 106.9               | 0.50    | RTP4     | 114.7               | 0.86    | MARCKS | 137.6               | 1.90    |
| LIPA      | 101.0               | 0.23    | ZNF313   | 106.9               | 0.50    | CFB      | 115.0               | 0.87    | GALNT2 | 138.2               | 1.92    |
| GTPBP2    | 101.3               | 0.24    | GEM      | 106.9               | 0.50    | RBCK1    | 116.3               | 0.93    | N4BP1  | 138.7               | 1.95    |
| SERPINB9  | 101.3               | 0.24    | MT1M     | 107.2               | 0.51    | DNATP6   | 116.6               | 0.94    | DDX60  | 140.6               | 2.03    |
| TIMP1     | 101.8               | 0.27    | PADI2    | 107.5               | 0.52    | IL15     | 116.9               | 0.95    | IDO1   | 147.3               | 2.34    |
| GCA       | 101.8               | 0.27    | NMI      | 107.5               | 0.52    | WHDC1    | 117.1               | 0.97    | ADAR   | 157.3               | 2.79    |
| CD38      | 101.8               | 0.27    | GBP5     | 107.5               | 0.52    | FAM46C   | 117.1               | 0.97    |        |                     |         |
| PNRC1     | 102.1               | 0.28    | C9orf19  | 107.5               | 0.52    | CCR1     | 117.1               | 0.97    |        |                     |         |
| VEGFC     | 102.3               | 0.29    | CD274    | 107.5               | 0.52    | GBP3     | 117.7               | 0.99    |        |                     |         |
| ISG15     | 102.3               | 0.29    | KIAA0040 | 108.0               | 0.55    | AHNAK2   | 117.7               | 0.99    |        |                     |         |
| TMEM51    | 102.3               | 0.29    | KIAA0082 | 108.0               | 0.55    | FCGR1A   | 117.7               | 0.99    |        |                     |         |
| ATP10D    | 102.3               | 0.29    | IL6ST    | 108.3               | 0.56    | NPAS2    | 118.0               | 1.00    |        |                     |         |
| CPT1A     | 102.3               | 0.29    | OPTN     | 108.3               | 0.56    | CRY1     | 118.2               | 1.02    |        |                     |         |
| OAS1      | 102.3               | 0.29    | DTX3L    | 108.3               | 0.56    | NT5C3    | 118.8               | 1.04    |        |                     |         |
| ULK4      | 102.6               | 0.30    | PPM1K    | 108.5               | 0.57    | C1S      | 119.3               | 1.06    |        |                     |         |
| LAP3      | 102.9               | 0.32    | S100A8   | 108.5               | 0.57    | SLC25A30 | 119.3               | 1.06    |        |                     |         |
| GBP2      | 102.9               | 0.32    | CCNA1    | 108.8               | 0.59    | ANGPTL1  | 120.4               | 1.11    |        |                     |         |
| C4orf33   | 102.9               | 0.32    | GTPBP1   | 108.8               | 0.59    | SLC16A1  | 120.4               | 1.11    |        |                     |         |
| Fluc      | 102.9               | 0.32    | MAFF     | 108.8               | 0.59    | PTMA     | 120.6               | 1.13    |        |                     |         |
| NOS2A     | 102.9               | 0.32    | CTCFL    | 109.1               | 0.60    | JAK2     | 121.2               | 1.15    |        |                     |         |
| UPP2      | 103.1               | 0.33    | HESX1    | 109.1               | 0.60    | PABPC4   | 121.5               | 1.16    |        |                     |         |
| MX1       | 103.1               | 0.33    | ZNF385B  | 109.6               | 0.62    | DCP1A    | 121.7               | 1.17    |        |                     |         |
| PSCD1     | 103.1               | 0.33    | PHF11    | 109.6               | 0.62    | MASTL    | 121.7               | 1.17    |        |                     |         |
| TRIM5     | 103.4               | 0.34    | RNF24    | 109.9               | 0.63    | EXT1     | 121.7               | 1.17    |        |                     |         |
| APOL6     | 103.7               | 0.35    | SOCS2    | 110.1               | 0.65    | PRKD2    | 122.0               | 1.19    |        |                     |         |
| SAT3      | 103.9               | 0.36    | SP110    | 110.1               | 0.65    | BUB1     | 123.1               | 1.24    |        |                     |         |
| TMEM140   | 103.9               | 0.36    | STAT1    | 110.4               | 0.66    | SAMHD1   | 123.3               | 1.25    |        |                     |         |
| OAS2      | 104.2               | 0.38    | APOL3    | 110.4               | 0.66    | HK2      | 123.6               | 1.26    |        |                     |         |
| CD80      | 104.5               | 0.39    | ADAMDEC1 | 110.7               | 0.67    | AXUD1    | 123.6               | 1.26    |        |                     |         |
| CLEC2B    | 104.8               | 0.40    | WARS     | 110.7               | 0.67    | CD163    | 125.0               | 1.32    |        |                     |         |
| TNFAIP3   | 104.8               | 0.40    | IFNGR1   | 111.0               | 0.68    | TLR7     | 125.5               | 1.35    |        |                     |         |
| CD69      | 104.8               | 0.40    | TDRD7    | 111.0               | 0.68    | ZNF295   | 125.8               | 1.36    |        |                     |         |
| CLEC4D    | 105.0               | 0.41    | HLA-E    | 111.2               | 0.70    | BLZF1    | 126.0               | 1.37    |        |                     |         |
| ENPP1     | 105.0               | 0.41    | APOBEC3A | 112.0               | 0.73    | ANKFY1   | 126.0               | 1.37    |        |                     |         |
| TRIM34    | 105.0               | 0.41    | CREB3L3  | 112.3               | 0.75    | SPTLC2   | 126.0               | 1.37    |        |                     |         |
| ZAP       | 105.0               | 0.41    | MS4A4A   | 112.3               | 0.75    | FNDC3B   | 126.8               | 1.41    |        |                     |         |
| ADM       | 105.3               | 0.43    | FAM125B  | 112.3               | 0.75    | TAGAP    | 127.1               | 1.42    |        |                     |         |
| MAP3K5    | 105.6               | 0.44    | ERLIN1   | 112.6               | 0.76    | HLA-C    | 127.4               | 1.43    |        |                     |         |
| APOL1     | 105.6               | 0.44    | IL1R     | 112.8               | 0.77    | BTN3A3   | 127.9               | 1.46    |        |                     |         |
| GAK       | 105.8               | 0.45    | AMPH     | 112.8               | 0.77    | DUSP5    | 128.2               | 1.47    |        |                     |         |
| TRIM21    | 105.8               | 0.45    | IFI16    | 112.8               | 0.77    | TXNIP    | 129.5               | 1.53    |        |                     |         |
| FKBP5     | 106.1               | 0.46    | PCTK3    | 113.4               | 0.79    | B4GALT5  | 129.5               | 1.53    |        |                     |         |
| ABLIM3    | 106.1               | 0.46    | FER1L3   | 113.4               | 0.79    | NCOA3    | 131.7               | 1.63    |        |                     |         |
| MT1G      | 106.4               | 0.48    | RBM25    | 113.4               | 0.79    | FLT1     | 132.5               | 1.67    |        |                     |         |
| OGFR      | 106.4               | 0.48    | PFKFB3   | 113.6               | 0.81    | TLK2     | 133.3               | 1.70    |        |                     |         |
| GBP4      | 106.4               | 0.48    | PARP12   | 113.6               | 0.81    | LEPR     | 133.3               | 1.70    |        |                     |         |
| MAX       | 106.9               | 0.50    | CCND3    | 113.9               | 0.82    | IRF9     | 133.6               | 1.71    |        |                     |         |

Supplementary Table 11: Gene ontology analysis of validated antiviral ISGs

| Gene ID | Gene Symbol | Gene Name                                                                 | Panther Molecular Function                                                      | Panther Biological Process                                                                       | Chromosome |
|---------|-------------|---------------------------------------------------------------------------|---------------------------------------------------------------------------------|--------------------------------------------------------------------------------------------------|------------|
| 115004  | C6orf150    | chromosome 6 open reading frame 150                                       | Molecular function unclassified                                                 | Biological process unclassified                                                                  | 6          |
| 972     | CD74        | CD74 molecule, major histocompatibility complex, class II invariant chain | Major histocompatibility complex antigen                                        | MHCII-mediated immunity                                                                          | 5          |
| 54541   | DDIT4       | DNA-damage-inducible transcript 4                                         | Molecular function unclassified                                                 | Biological process unclassified                                                                  | 10         |
| 23586   | DDX58       | DEAD (Asp-Glu-Ala-Asp) box polypeptide 58                                 | Helicase                                                                        | Nucleoside, nucleotide and nucleic acid metabolism;Apoptosis                                     | 9          |
| 55601   | DDX60       | DEAD (Asp-Glu-Ala-Asp) box polypeptide 60                                 | Helicase;Hydrolase                                                              | Nucleoside, nucleotide and nucleic acid metabolism;Meiosis                                       | 4          |
| 10655   | HPSE        | heparanase                                                                | Glycosidase                                                                     | Developmental processes                                                                          | 4          |
| 10964   | IF44L       | interferon-induced protein 44-like                                        | Molecular function unclassified                                                 | Biological process unclassified                                                                  | 1          |
| 2537    | IF16        | interferon, alpha-inducible protein 6                                     | Molecular function unclassified                                                 | Immunity and defense                                                                             | 1          |
| 64135   | IFIH1       | interferon induced with helicase C domain 1                               | Helicase;Hydrolase                                                              | Nucleoside, nucleotide and nucleic acid metabolism;Apoptosis                                     | 2          |
| 10591   | IFTM2       | interferon induced transmembrane protein 2 (1-8D)                         | Other miscellaneous function protein                                            | Immunity and defense;Cell proliferation and differentiation                                      | 11         |
| 10410   | IFTM3       | interferon induced transmembrane protein 3 (1-8U)                         | Other miscellaneous function protein                                            | Immunity and defense;Cell proliferation and differentiation                                      | 11         |
| 3659    | IRF1        | interferon regulatory factor 1                                            | Other transcription factor;Nucleic acid binding                                 | mRNA transcription regulation;Interferon-mediated immunity;Oncogenesis                           | 5          |
| 3665    | IRF7        | interferon regulatory factor 7                                            | Other transcription factor;Nucleic acid binding                                 | mRNA transcription regulation;Interferon-mediated immunity;Oncogenesis                           | 11         |
| 9020    | MAP3K14     | mitogen-activated protein kinase kinase kinase 14                         | Protein kinase;Transferase                                                      | Protein phosphorylation;Phosphate metabolism;Other metabolism                                    | 17         |
| 4343    | MOV10       | MOV10, Moloney leukemia virus 10, homolog (mouse)                         | Helicase;Hydrolase                                                              | Other nucleoside, nucleotide and nucleic acid metabolism;Other metabolism                        | 1          |
| 51338   | MS4AAA      | membrane-spanning 4-domains, subfamily A, member 4                        | Receptor                                                                        | Biological process unclassified                                                                  | 11         |
| 4600    | MX2         | myxovirus (influenza virus) resistance 2 (mouse)                          | Microtubule family cytoskeletal protein;Small GTPase;Other hydrolase            | Endocytosis;Transport;Cell structure                                                             | 21         |
| 51251   | NT5C3       | 5'-nucleotidase, cytosolic III                                            | Esterase                                                                        | Biological process unclassified                                                                  | 7          |
| 8638    | OASL        | 2'-5'-oligoadenylate synthetase-like                                      | Nucleic acid binding;Synthetase;Nucleotidyltransferase;Defense/immunity protein | Nucleoside, nucleotide and nucleic acid metabolism;Interferon-mediated immunity;Other metabolism | 12         |
| 5031    | P2RY6       | pyrimidinergic receptor P2Y, G-protein coupled, 6                         | G-protein coupled receptor                                                      | G-protein mediated signaling                                                                     | 11         |
| 10135   | PBEF1       | pre-B-cell colony enhancing factor 1                                      | Other cytokine                                                                  | Ligand-mediated signaling;Immunity and defense                                                   | 7          |
| 23338   | PHF15       | PHD finger protein 15                                                     | Other zinc finger;transcription factor;Nucleic acid binding                     | mRNA transcription initiation;Oncogenesis                                                        | 5          |
| 64108   | RTP4        | receptor (chemosensory) transporter protein 4                             | Molecular function unclassified                                                 | Biological process unclassified                                                                  | 3          |
| 51296   | SLC15A3     | solute carrier family 15, member 3                                        | Other transporter                                                               | Small molecule transport;Other transport                                                         | 11         |
| 81894   | SLC25A28    | solute carrier family 25, member 28                                       | Mitochondrial carrier protein                                                   | Small molecule transport                                                                         | 10         |
| 23648   | SSBP3       | single stranded DNA binding protein 3                                     | Single-stranded DNA-binding protein                                             | mRNA transcription initiation;mRNA transcription regulation                                      | 1          |
| 11277   | TREX1       | three prime repair exonuclease 1                                          | Molecular function unclassified                                                 | Biological process unclassified                                                                  | 3          |
| 25777   | UNC84B      | unc-84 homolog B (C. elegans)                                             | Non-motor microtubule binding protein                                           | Meiosis                                                                                          | 22         |

**Supplementary Table 11.** Gene ontology analysis of validated antiviral ISGs. The PANTHER Classification System was used to classify validated antiviral ISGs by molecular function or biological process. Table shows GeneID, gene symbol, gene name, molecular function, biological process, and chromosome location.
